# Supplementary material for: Synthesis of fullerenyl-1,2,3-triazoles by reaction of fullerenyl azide with terminal acetylenes
Source: Royal Society of Chemistry journal article supplement (doi:10.1039/d1ob01483h), 2021-01-01
Supplement: d1ob01483h1.pdf [file d1ob01483h1.pdf]

*Supporting Information*

**Synthesis of fullereryl-1,2,3-triazoles by reaction of fullereryl  
azide with terminal acetylenes**

Z. R. Sadretdinova, A. R. Akhmetov, A.R.Tulyabaev, Yu. H. Budnikova, Yu. B. Dudkina, A. R.  
Tuktarov, U. M. Dzhemilev

Institute of Petrochemistry and Catalysis, Russian Academy of Sciences. 141 Pr. Octyabrya, Ufa,  
450075, Russian Federation

Arbuzov Institute of Organic and Physical Chemistry of RAS, 8. Arbuzov str., 420088 Kazan, Russian  
Federation

## Table of Contents

|                                                                                                                  |         |
|------------------------------------------------------------------------------------------------------------------|---------|
| Figure S1.....                                                                                                   | S3      |
| Figure S2.....                                                                                                   | S3      |
| Copies of <sup>1</sup> H NMR, <sup>13</sup> C NMR, COSY, HMBC, HSQC<br>spectra of compound <b>2</b> .....        | S4-S6   |
| Copies of <sup>1</sup> H NMR, <sup>13</sup> C NMR, COSY, HMBC, HSQC<br>spectra of compound <b>3</b> .....        | S7-S9   |
| Copies of <sup>1</sup> H NMR, <sup>13</sup> C NMR, COSY, HMBC, HSQC<br>spectra of compound <b>4</b> .....        | S10-S12 |
| Copies of <sup>1</sup> H NMR, <sup>13</sup> C NMR, COSY, HMBC, HSQC<br>spectra of compound <b>5</b> .....        | S13-S16 |
| Copies of <sup>1</sup> H NMR, <sup>13</sup> C NMR, COSY, HMBC, HSQC, NOESY<br>spectra of compound <b>6</b> ..... | S16-S19 |
| Copies of <sup>1</sup> H NMR, <sup>13</sup> C NMR, COSY, HMBC, HSQC<br>spectra of compound <b>7</b> .....        | S19-S22 |
| Copies of <sup>1</sup> H NMR, <sup>13</sup> C NMR, COSY, HMBC, HSQC<br>spectra of compound <b>8</b> .....        | S22-S25 |
| Copies of <sup>1</sup> H NMR, <sup>13</sup> C NMR, COSY, HMBC, HSQC<br>spectra of compound <b>9</b> .....        | S25-S28 |
| Copies of <sup>1</sup> H NMR, <sup>13</sup> C NMR, COSY, HMBC, HSQC<br>spectra of compound <b>10</b> .....       | S28-S31 |
| Copies of <sup>1</sup> H NMR, <sup>13</sup> C NMR, COSY, HMBC, HSQC<br>spectra of compound <b>11</b> .....       | S31-S34 |
| Copies of <sup>1</sup> H NMR, <sup>13</sup> C NMR, COSY, HMBC, HSQC<br>spectra of compound <b>12</b> .....       | S34-S37 |
| Copies of <sup>1</sup> H NMR, <sup>13</sup> C NMR, COSY, HMBC, HSQC<br>spectra of compound <b>13</b> .....       | S37-S40 |
| Copies of <sup>1</sup> H NMR, <sup>13</sup> C NMR, COSY, HMBC, HSQC<br>spectra of compound <b>14</b> .....       | S40-S43 |
| Copies of <sup>1</sup> H NMR, <sup>13</sup> C NMR, COSY, HMBC, HSQC<br>spectra of compound <b>15</b> .....       | S43-S46 |
| Copies of <sup>1</sup> H NMR, <sup>13</sup> C NMR, COSY, HMBC, HSQC<br>spectra of compound <b>16</b> .....       | S46-S49 |
| Cartesian coordinates for compound <b>5</b> .....                                                                | S50-51  |
| Cartesian coordinates for compound <b>6</b> .....                                                                | S52-53  |
| Cartesian coordinates for compound <b>15</b> .....                                                               | S54-56  |
| Cartesian coordinates for compound <b>16</b> .....                                                               | S56-58  |

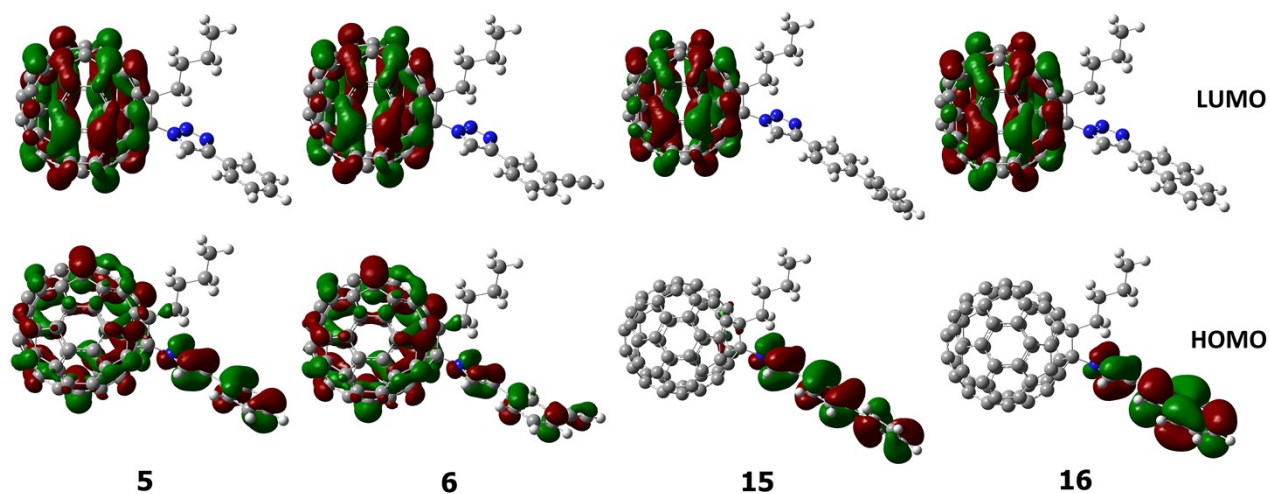

**Figure S1.** Distribution of the boundary orbitals of compounds **5**, **6**, **15**, and **16** calculated at the PBE/PBE/6-311G(d,p) level of theory.

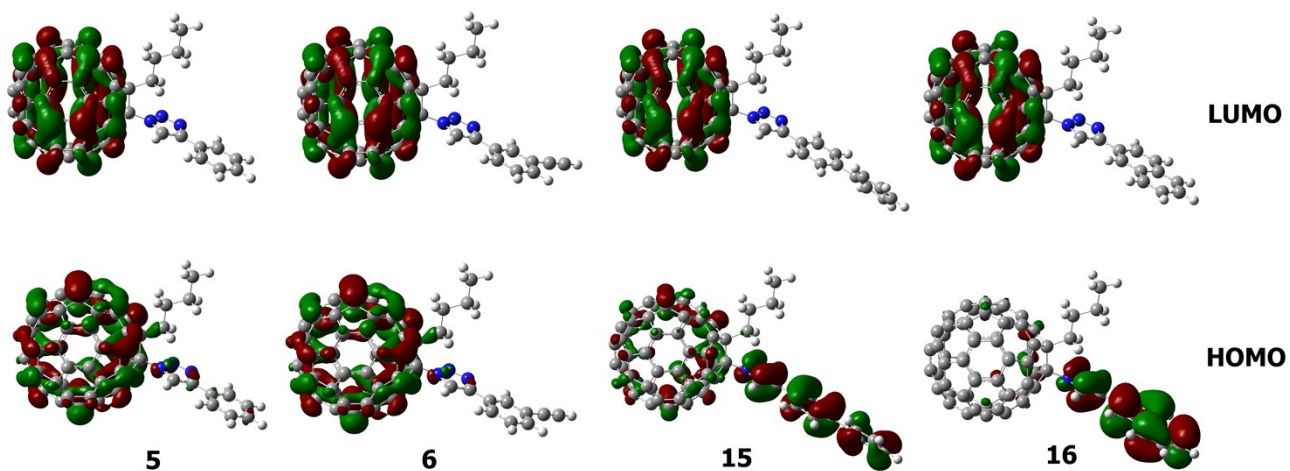

**Figure S2.** Distribution of the boundary orbitals of compounds **5**, **6**, **15**, and **16** calculated at the B3LYP / 6-31G (d, p) level of theory.

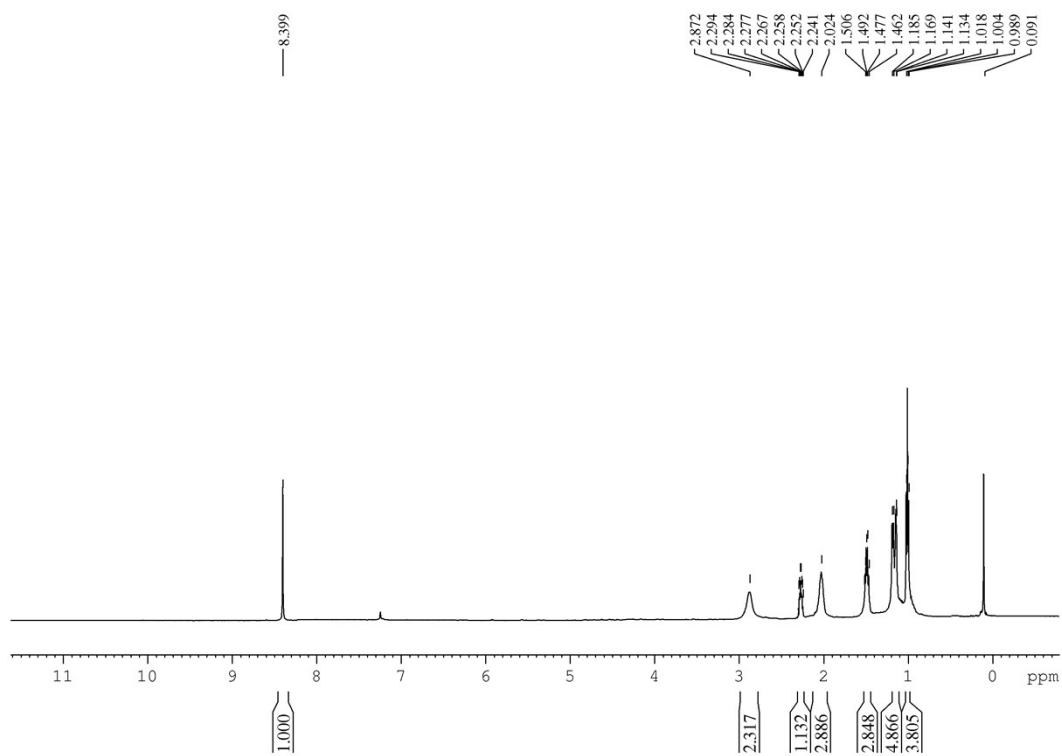

Figure S1. Copy of  $^1\text{H}$  NMR spectra of compound 2

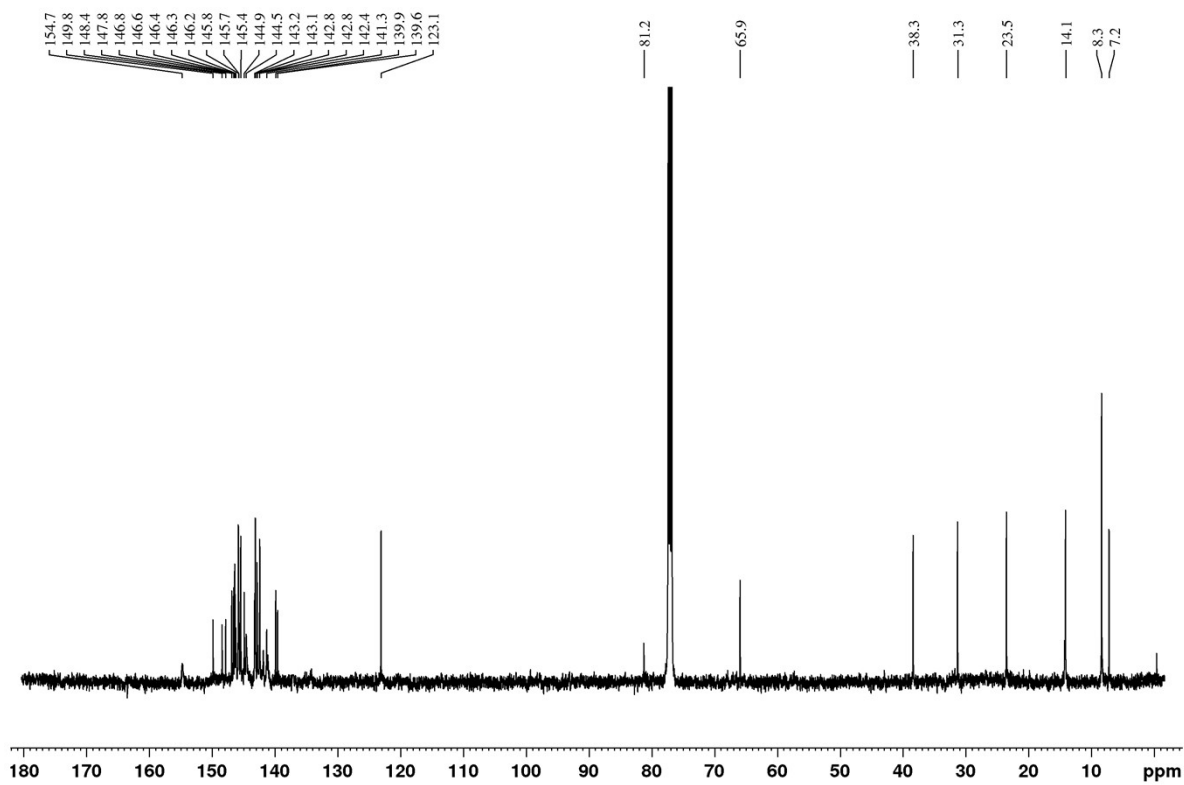

Figure S2. Copy of  $^{13}\text{C}$  NMR spectra of compound 2

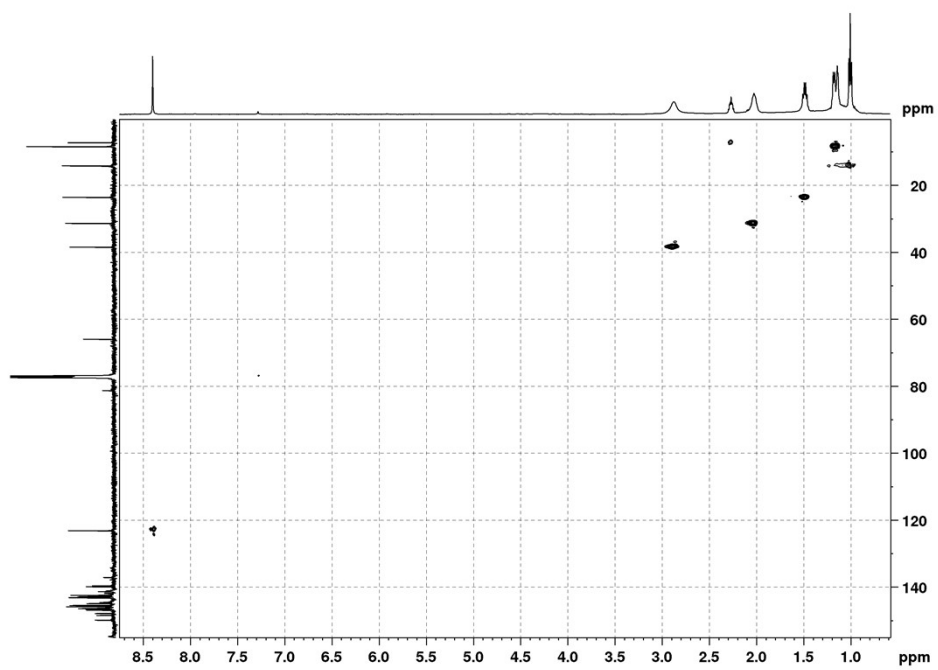

Figure S3. Copy of HSQC spectra of compound 2

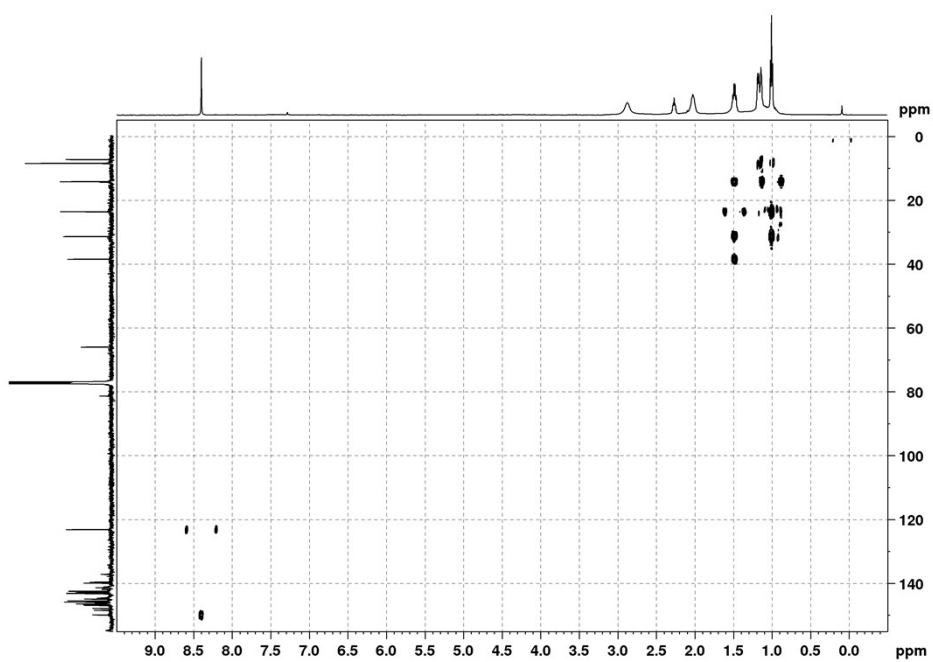

Figure S4. Copy of HMBC spectra of compound 2

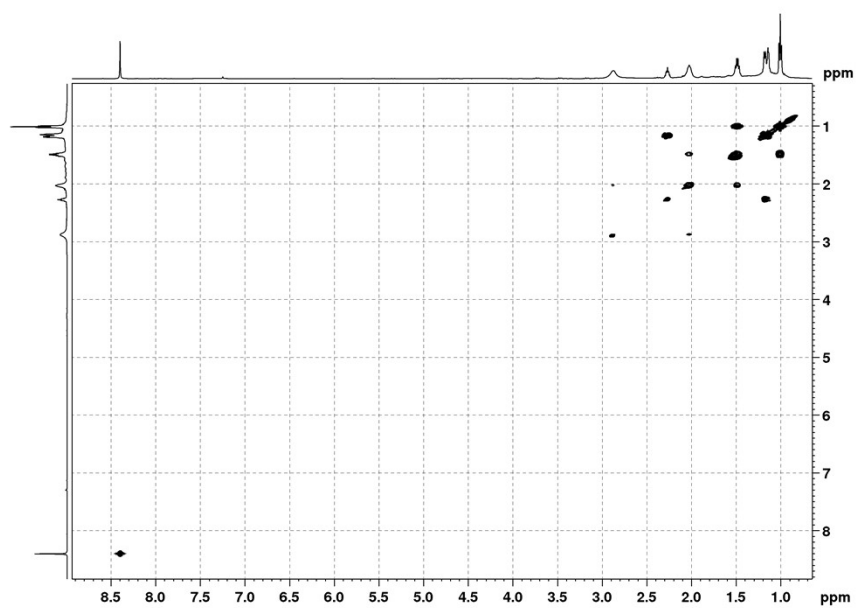

Figure S5. Copy of COSY spectra of compound 2

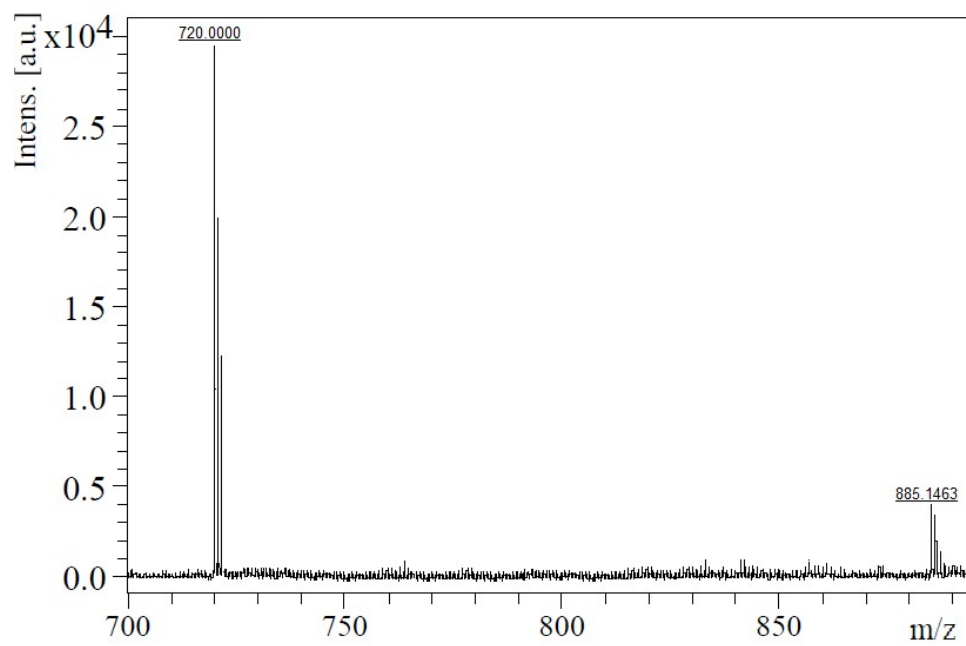

Figure S6. Copy of MALDI TOF spectra of compound 2

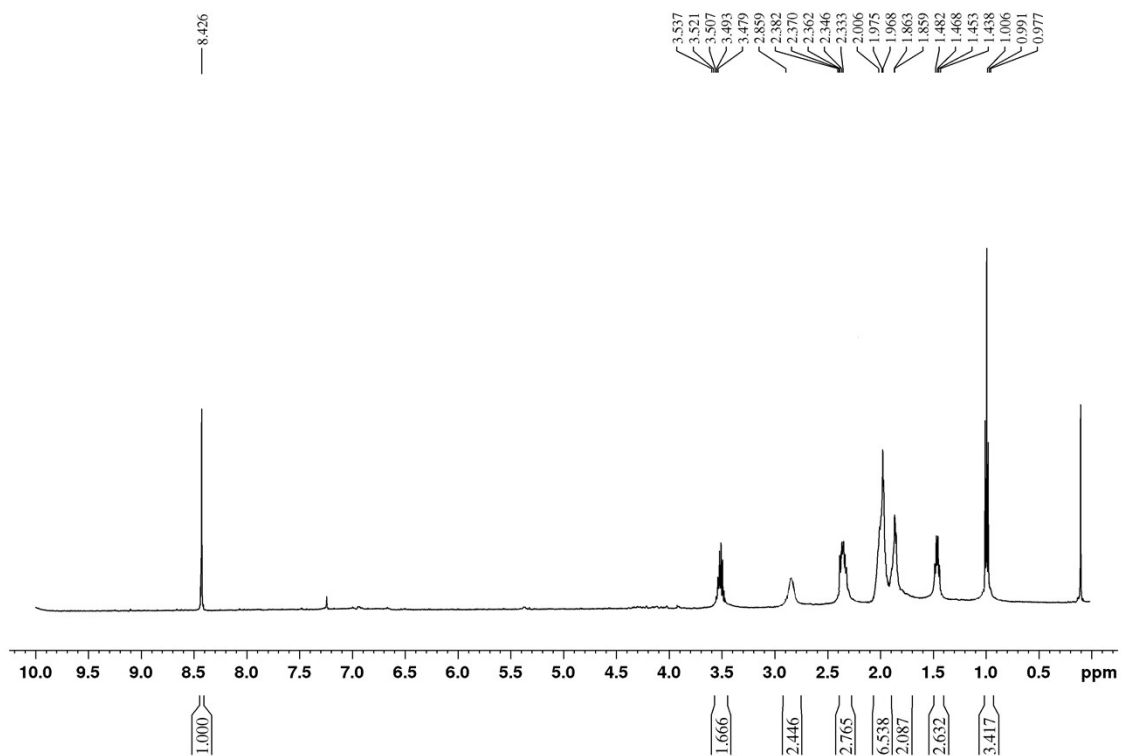

Figure S7. Copy of  $^1\text{H}$  NMR spectra of compound 3

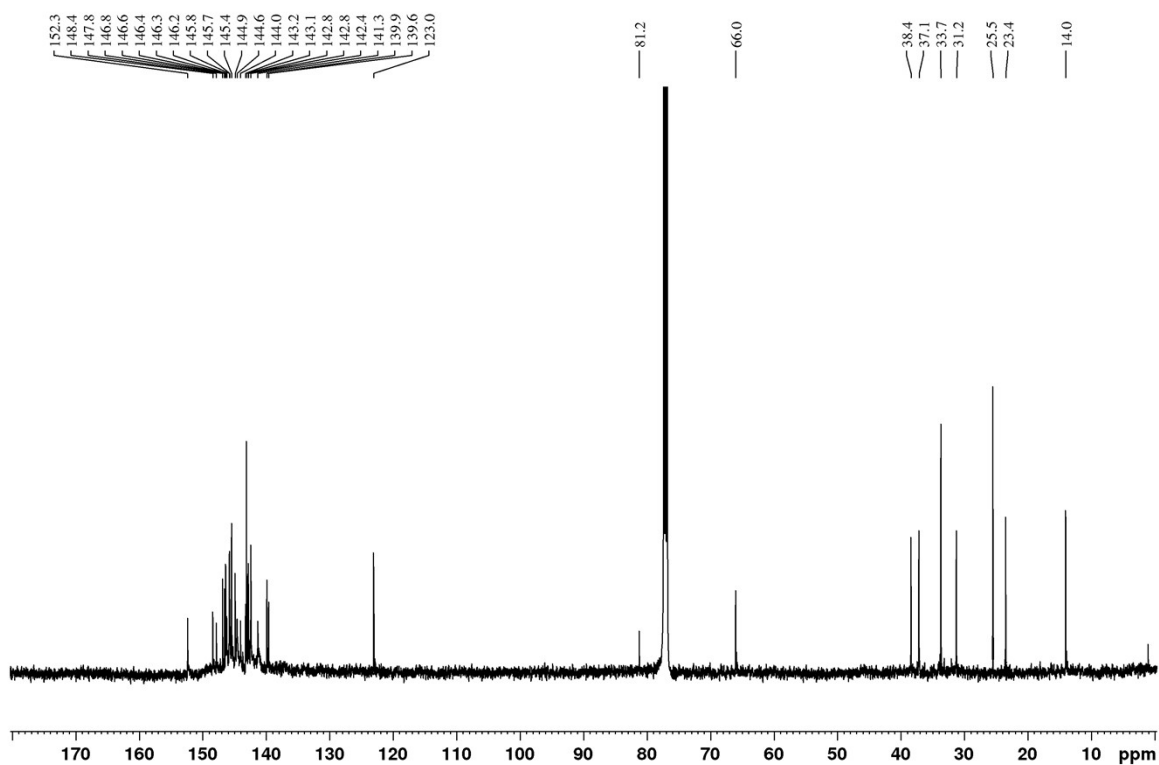

Figure S8. Copy of  $^{13}\text{C}$  NMR spectra of compound 3

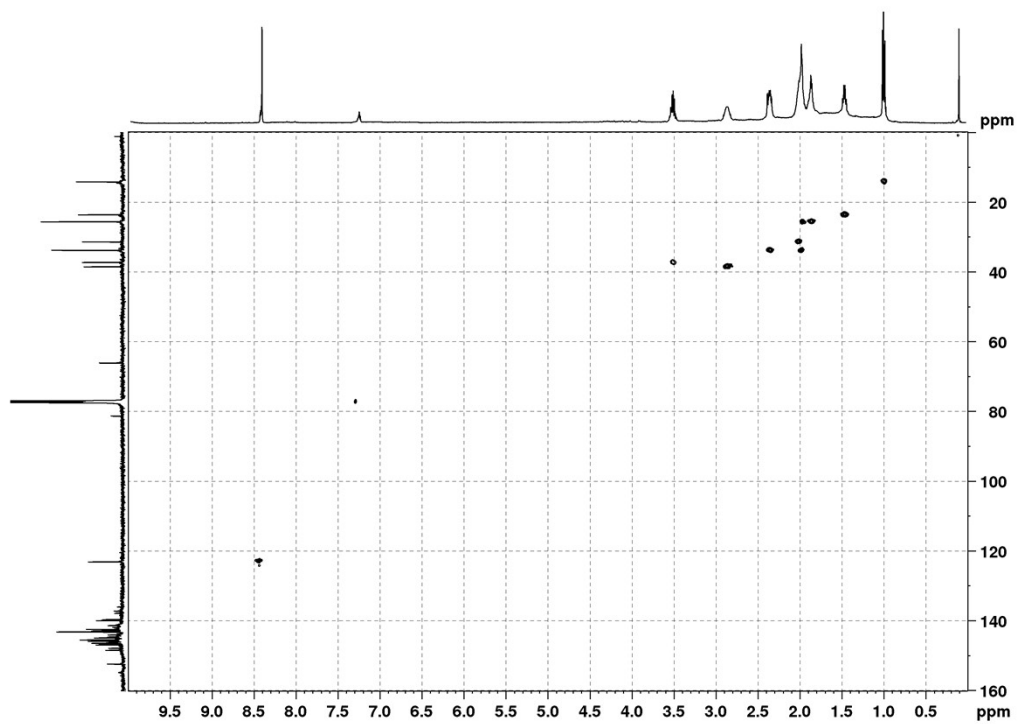

**Figure S9.** Copy of HSQC spectra of compound **3**

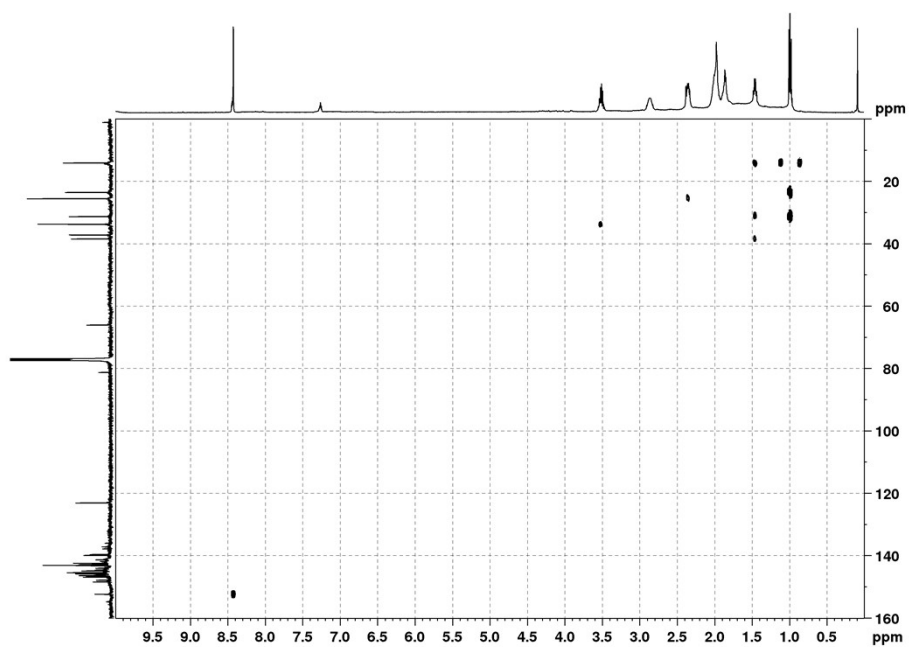

**Figure S10.** Copy of HMBC spectra of compound **3**



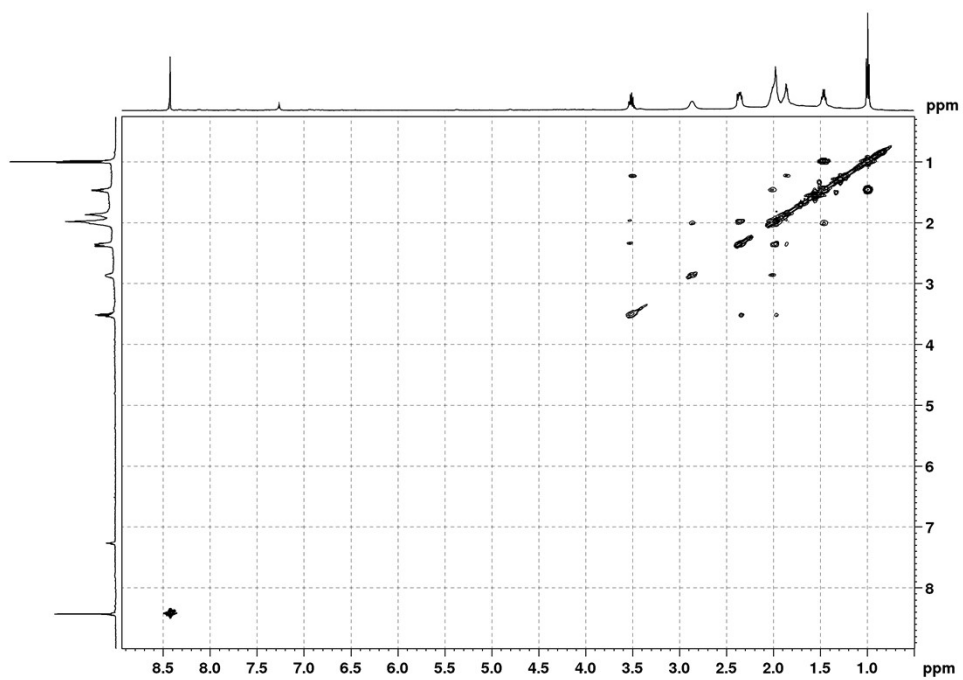

**Figure S11.** Copy of COSY spectra of compound **3**

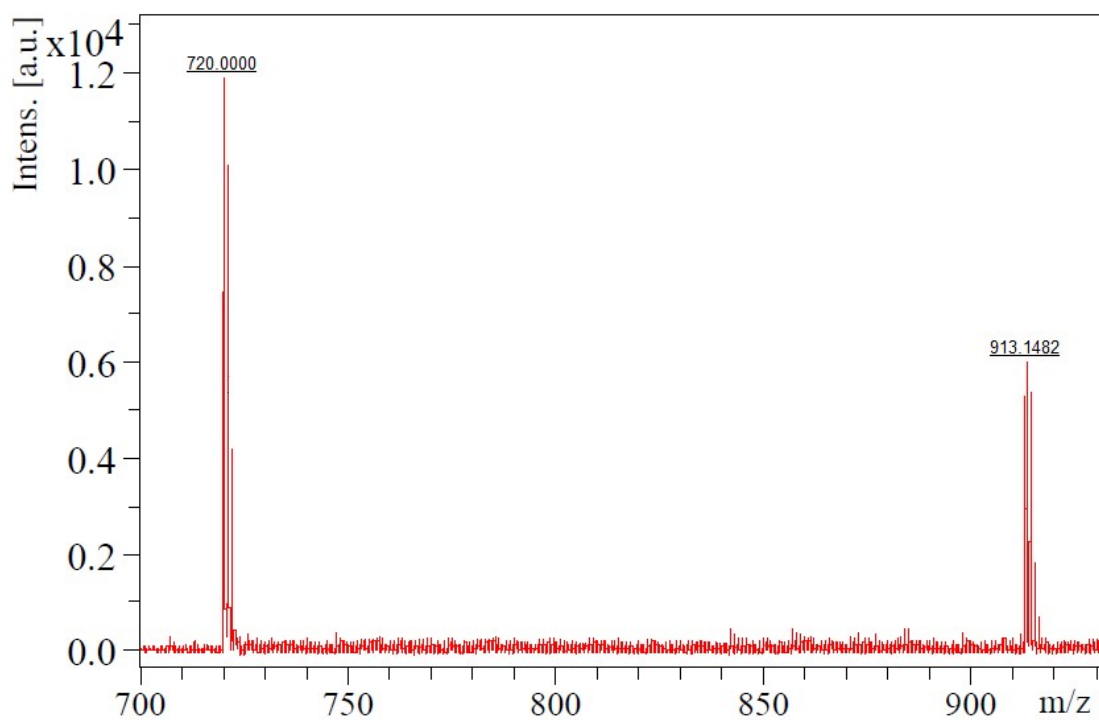

**Figure S12.** Copy of MALDI TOF spectra of compound **3**

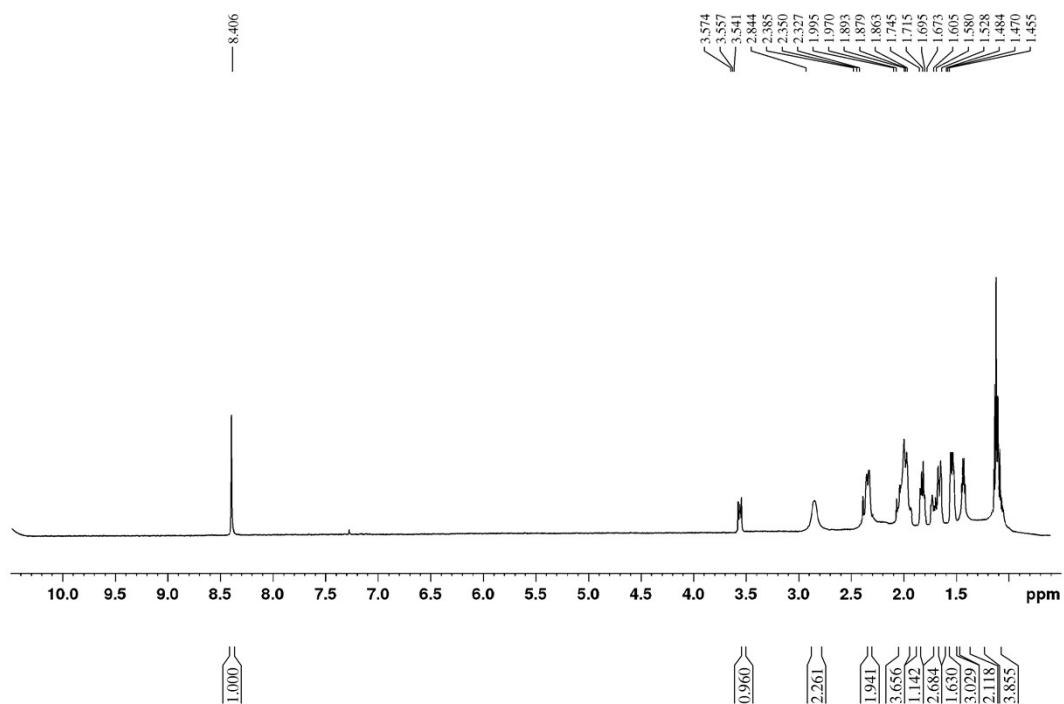

Figure S13. Copy of  $^1\text{H}$  NMR spectra of compound 4

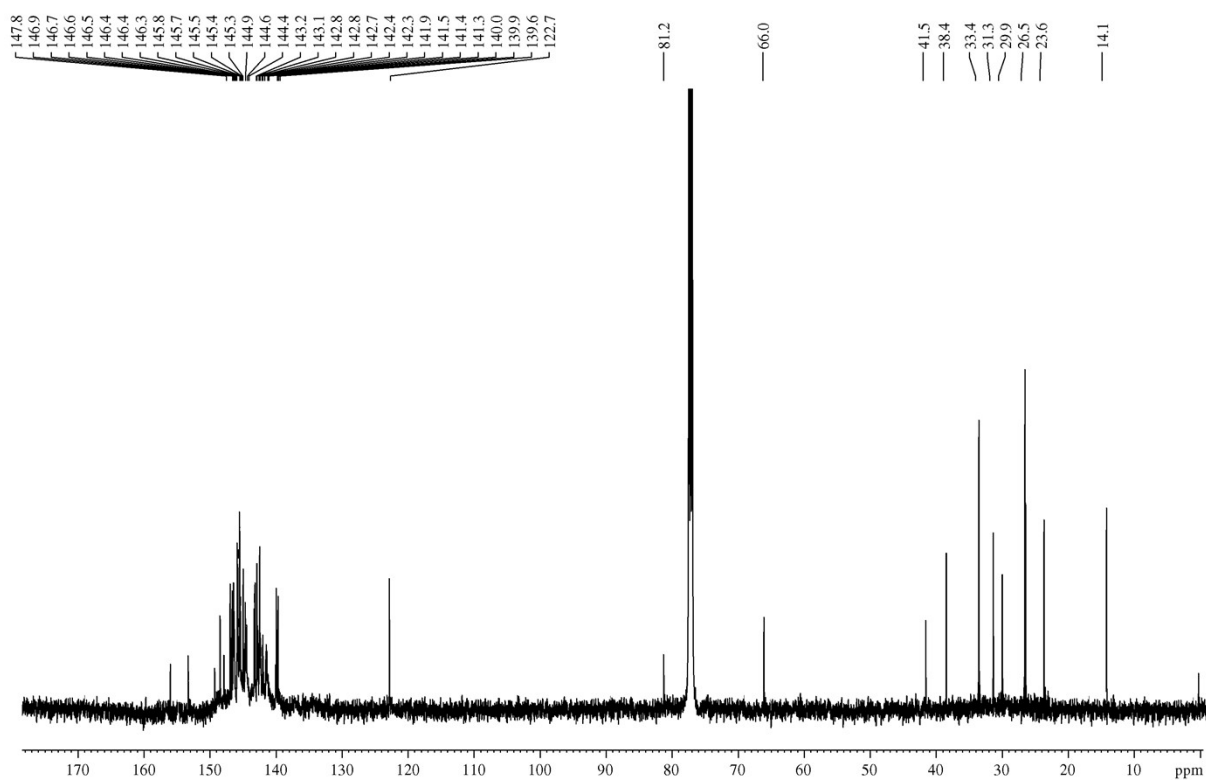

Figure S14. Copy of  $^{13}\text{C}$  NMR spectra of compound 4

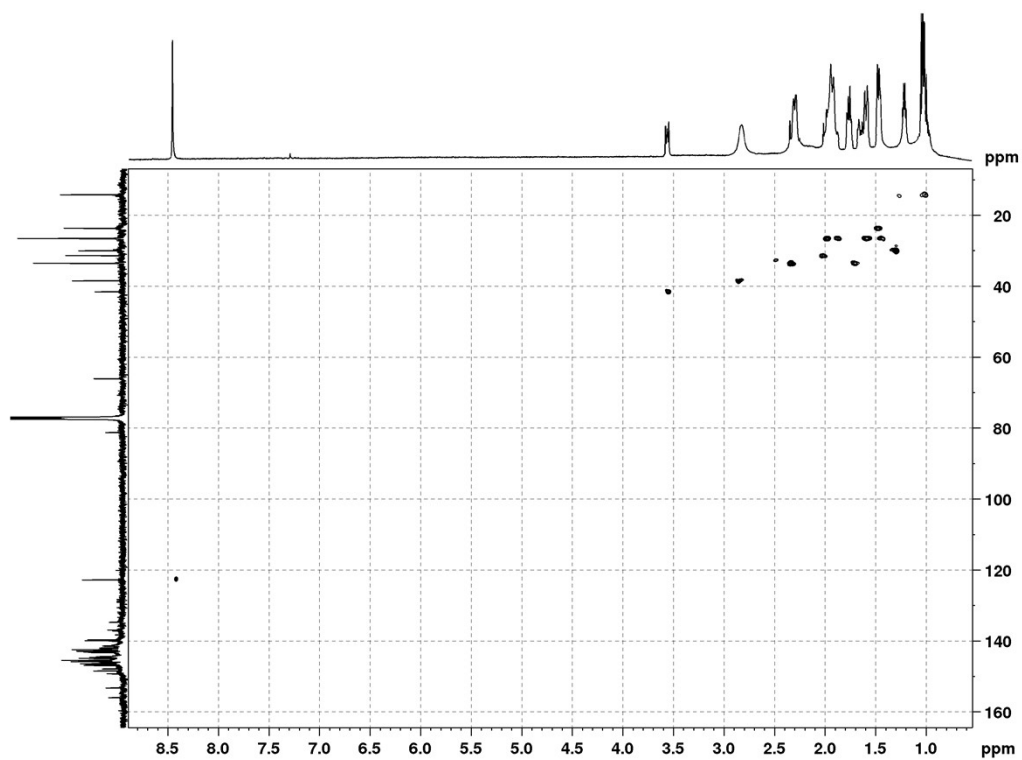

Figure S15. Copy of HSQC NMR spectra of compound 4

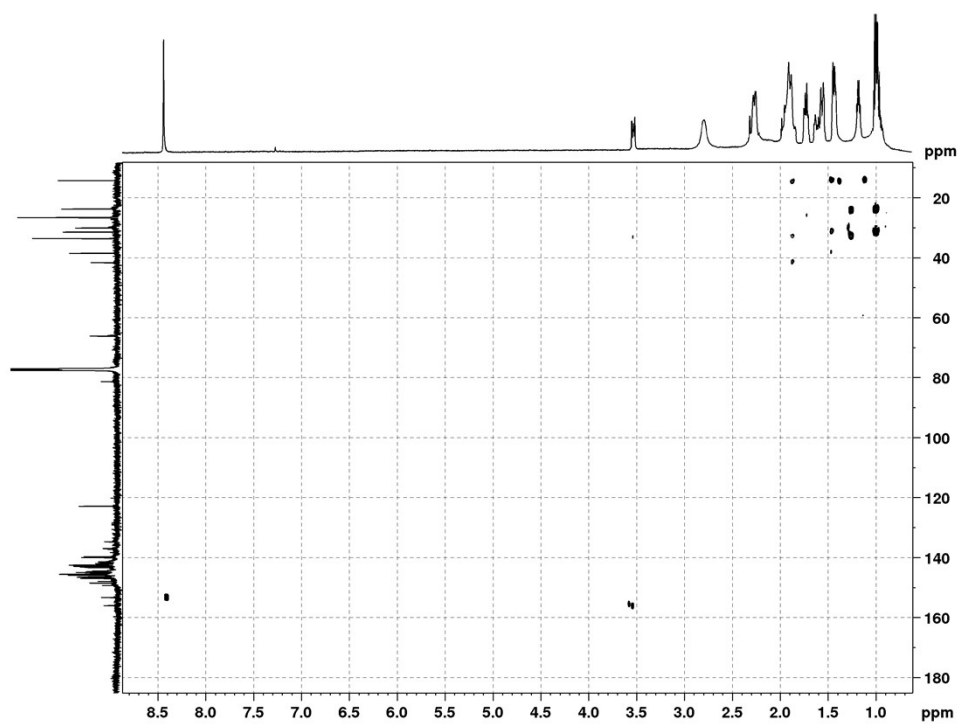

Figure S16. Copy of HMBC NMR spectra of compound 4

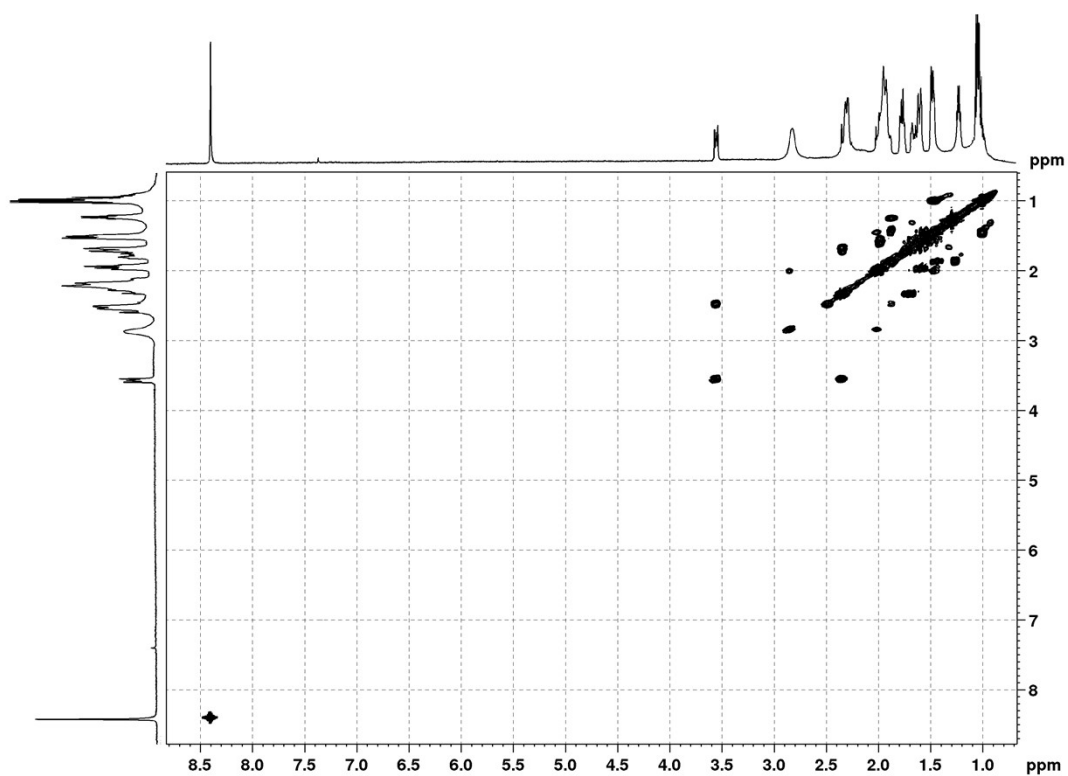

Figure S17. Copy of COSY NMR spectra of compound 4

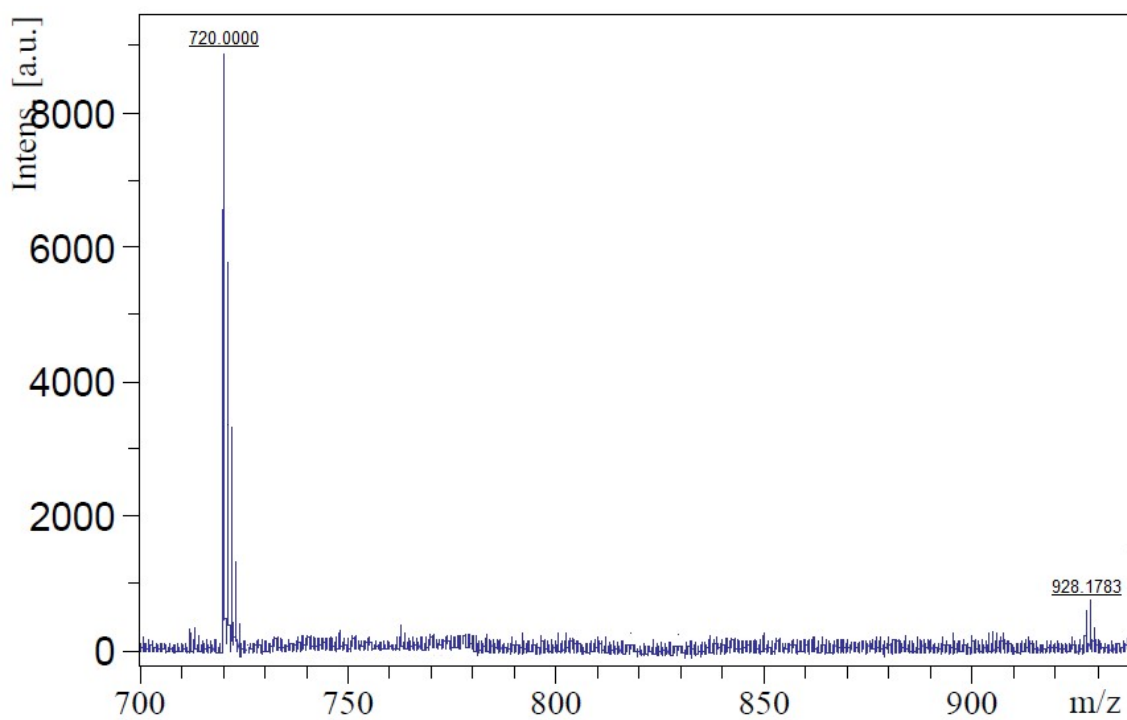

Figure S18. Copy of MALDI TOF spectra of compound 4

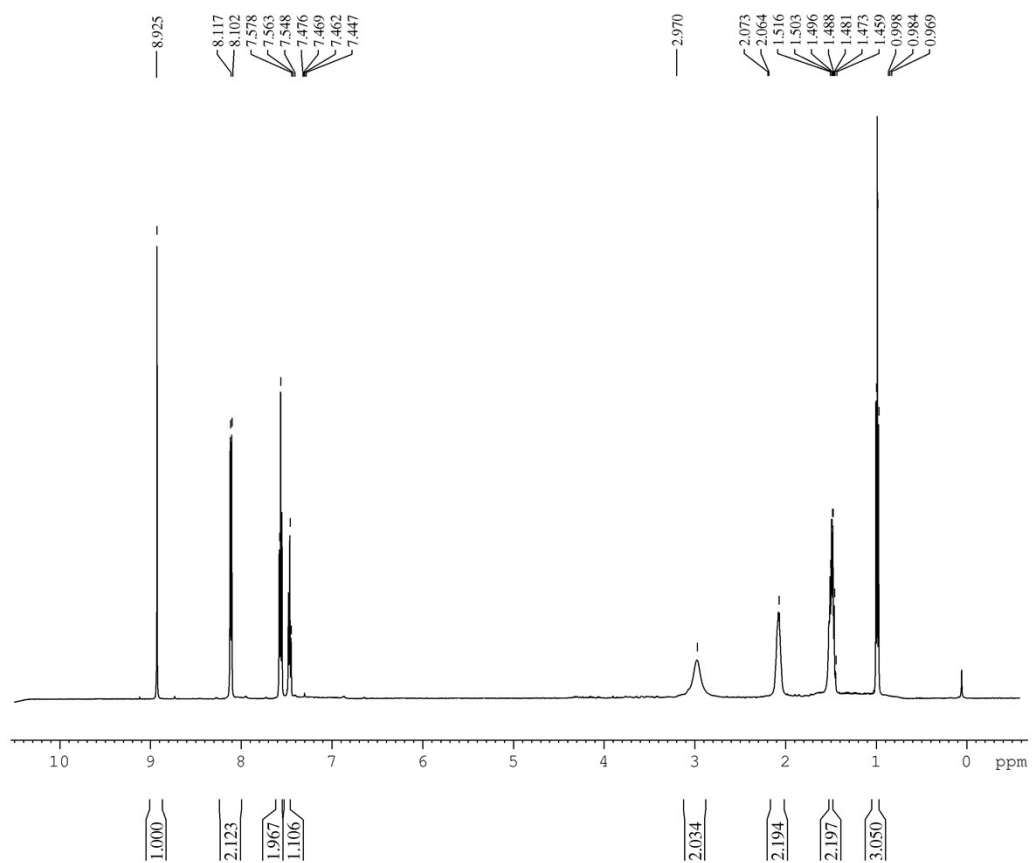

Figure S19. Copy of  $^1\text{H}$  NMR spectra of compound **5**

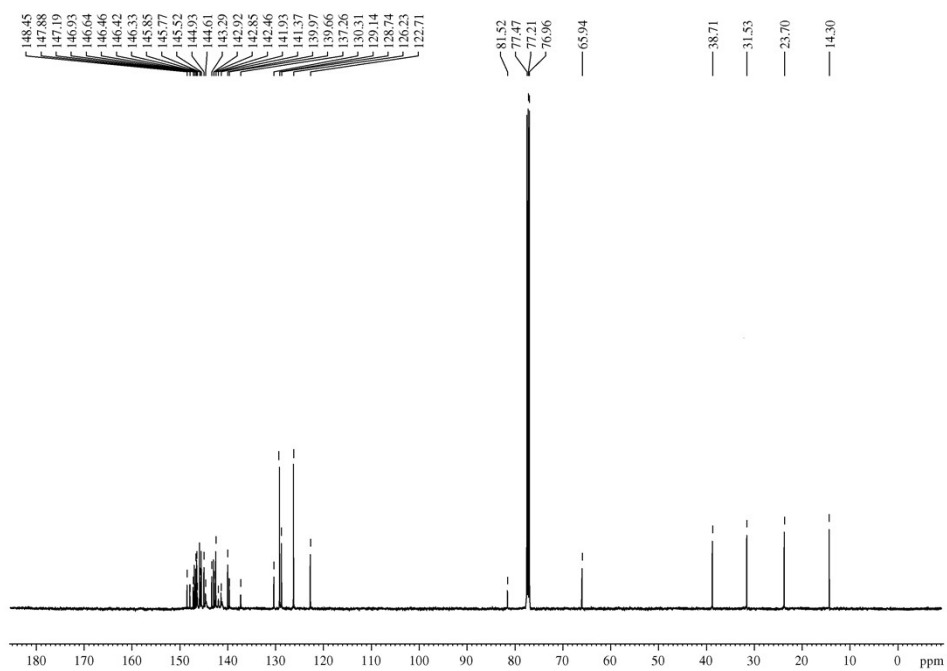

Figure S20. Copy of  $^{13}\text{C}$  NMR spectra of compound **5**

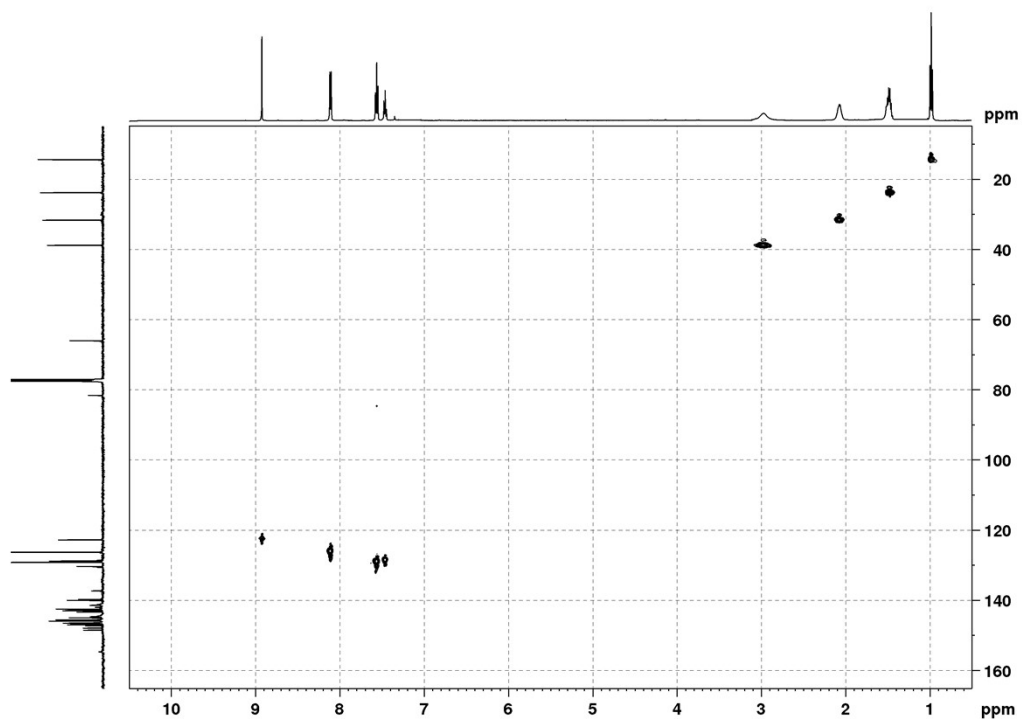

**Figure S21.** Copy of HSQC NMR spectra of compound **5**

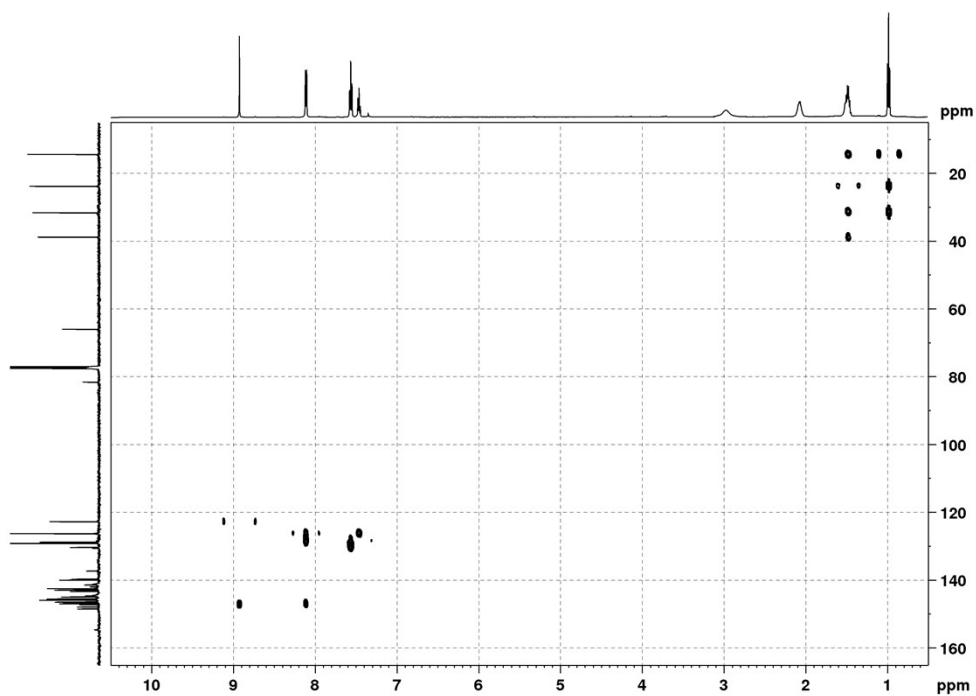

**Figure S22.** Copy of HMBC NMR spectra of compound **5**

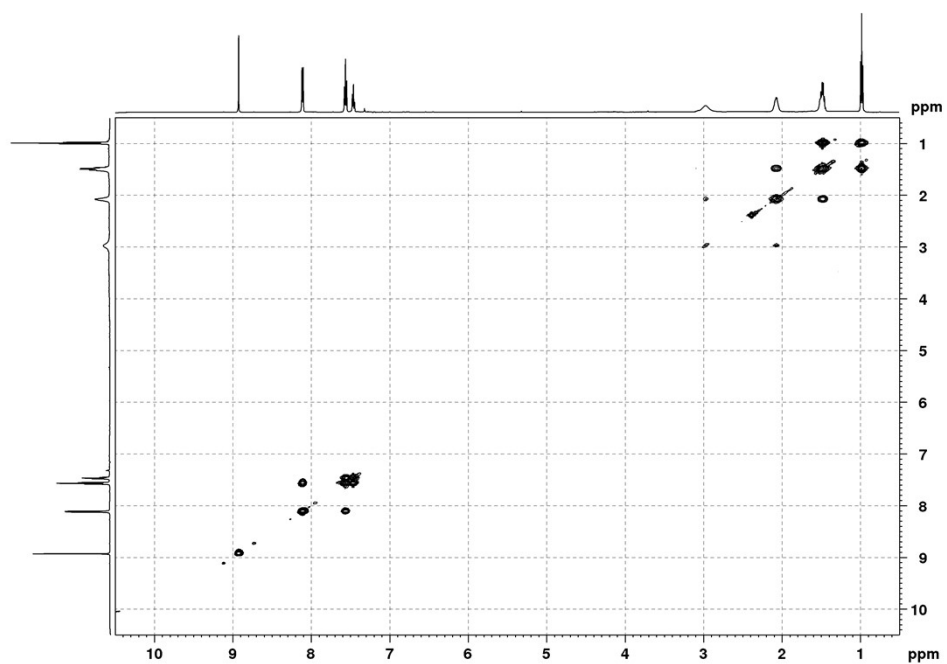

**Figure S23.** Copy of COSY NMR spectra of compound **5**

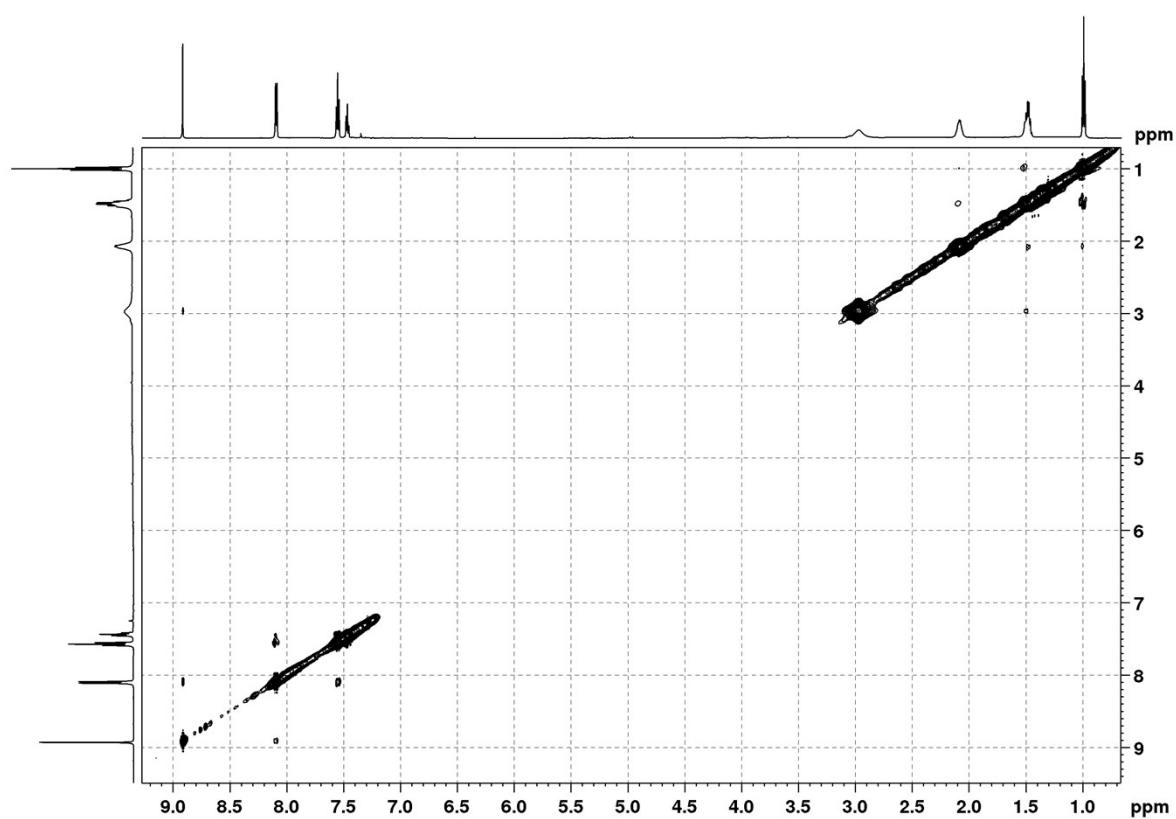

**Figure S24.** Copy of NOESY NMR spectra of compound **5**

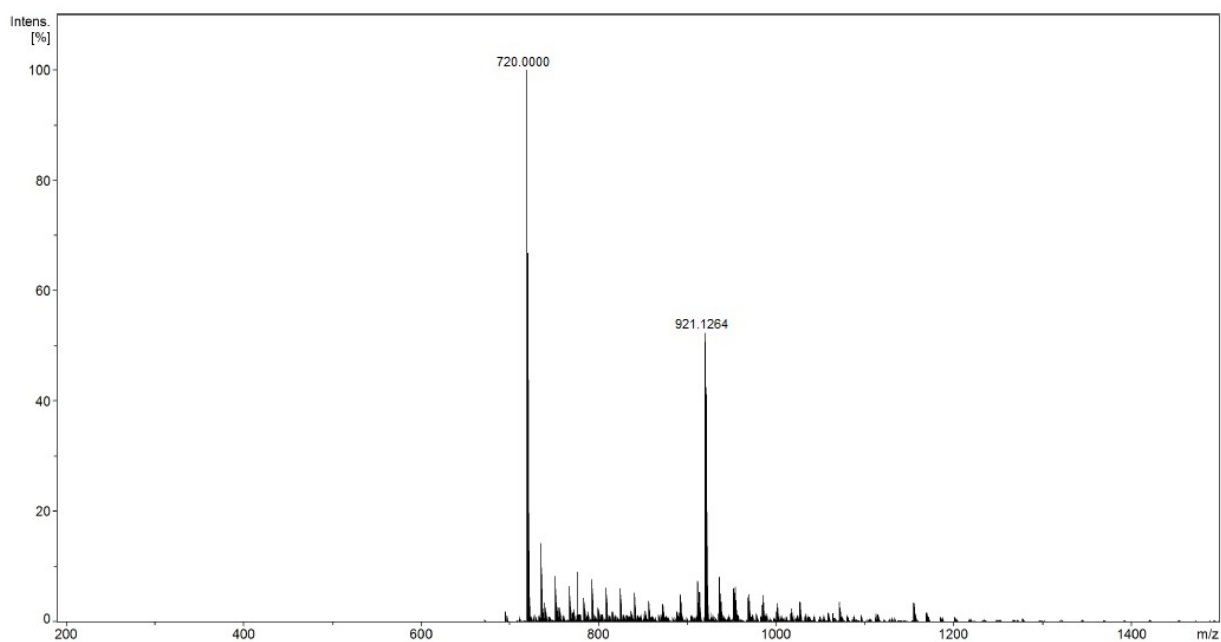

**Figure S25.** Copy of MALDI TOF spectra of compound **5**

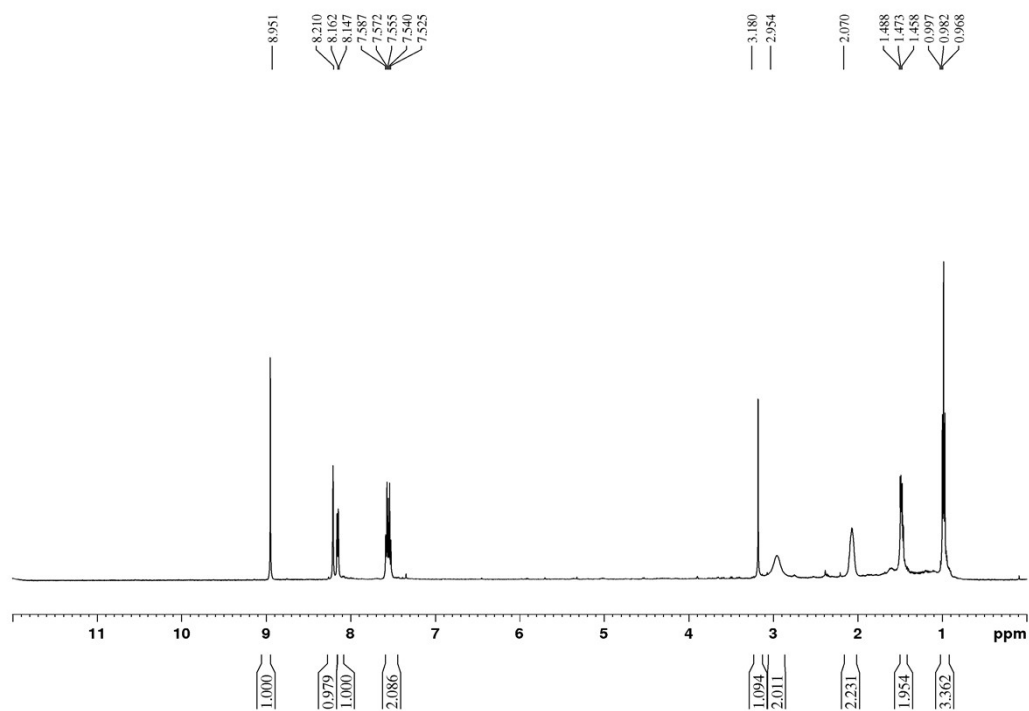

**Figure S26.** Copy of <sup>1</sup>H NMR spectra of compound **6**



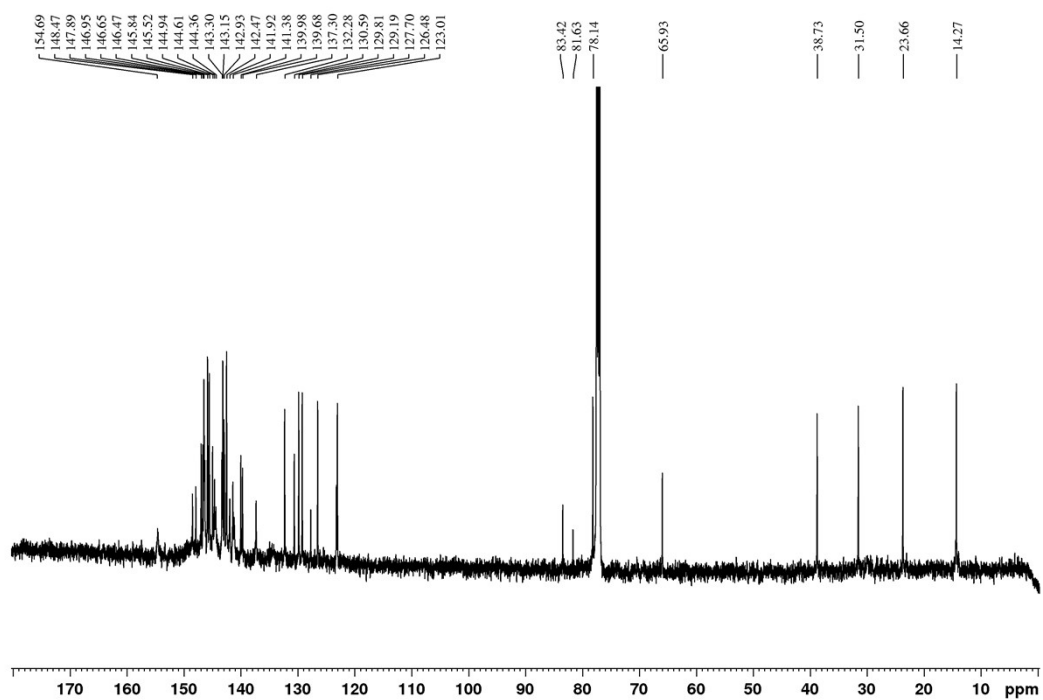

Figure S27. Copy of  $^{13}\text{C}$  NMR spectra of compound 6

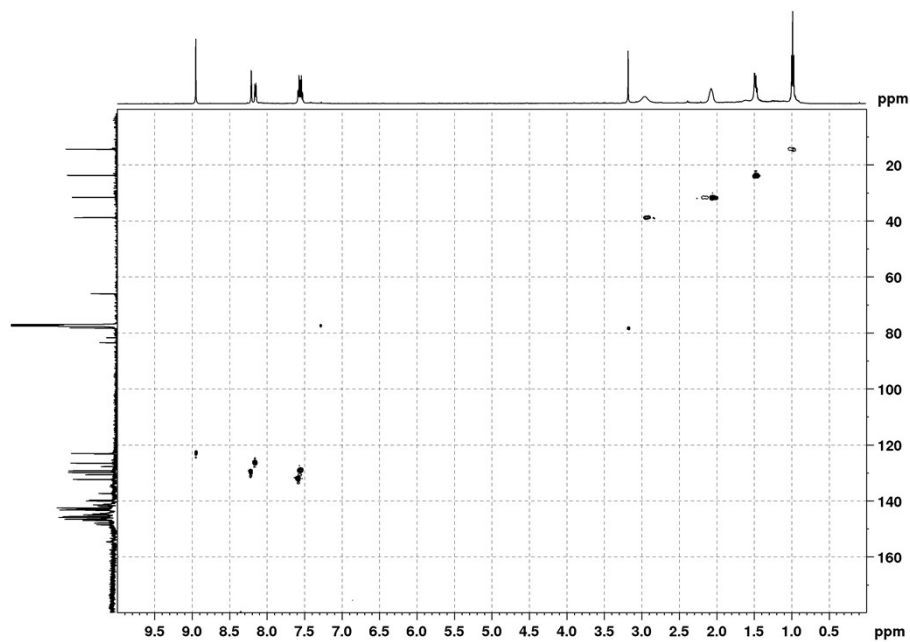

Figure S28. Copy of HSQC NMR spectra of compound 6

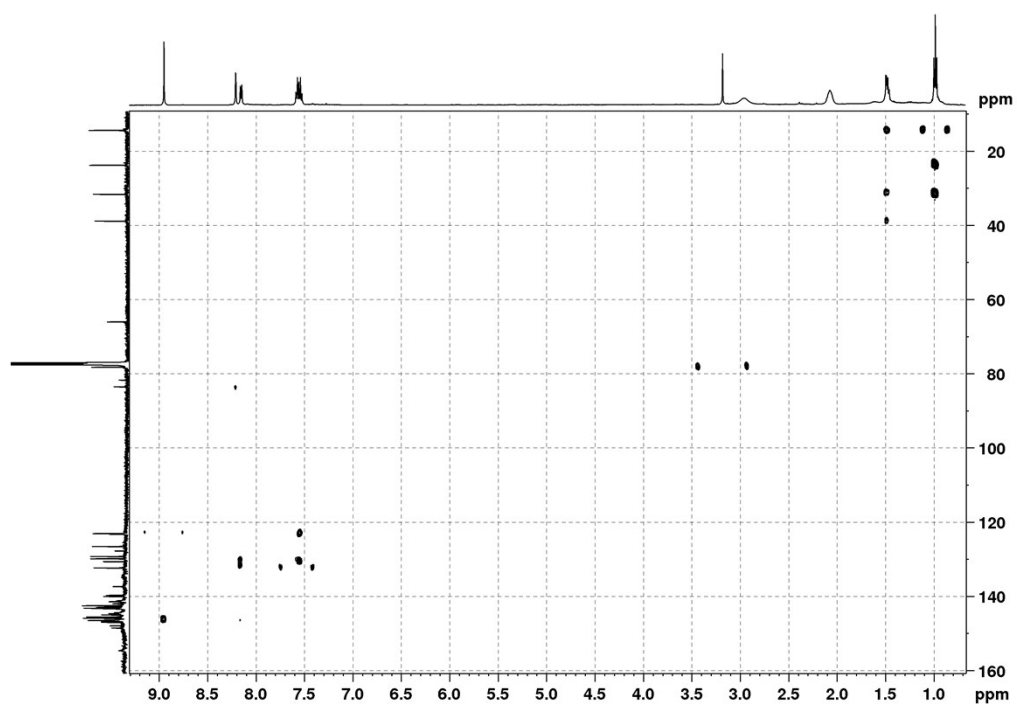

**Figure S29.** Copy of HMBC NMR spectra of compound **6**

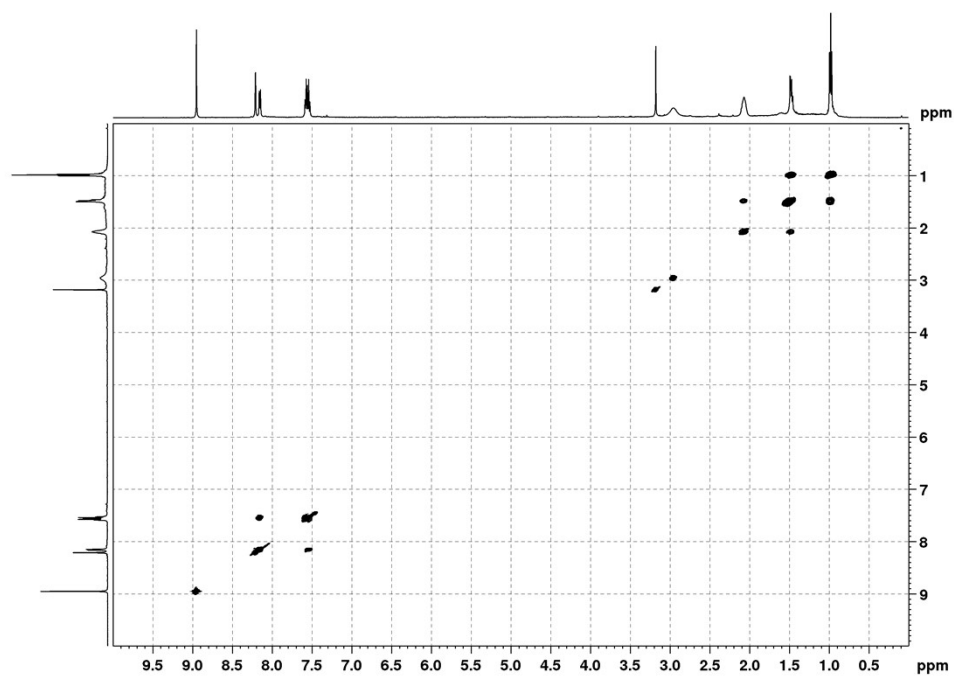

**Figure S30.** Copy of COSY NMR spectra of compound **6**

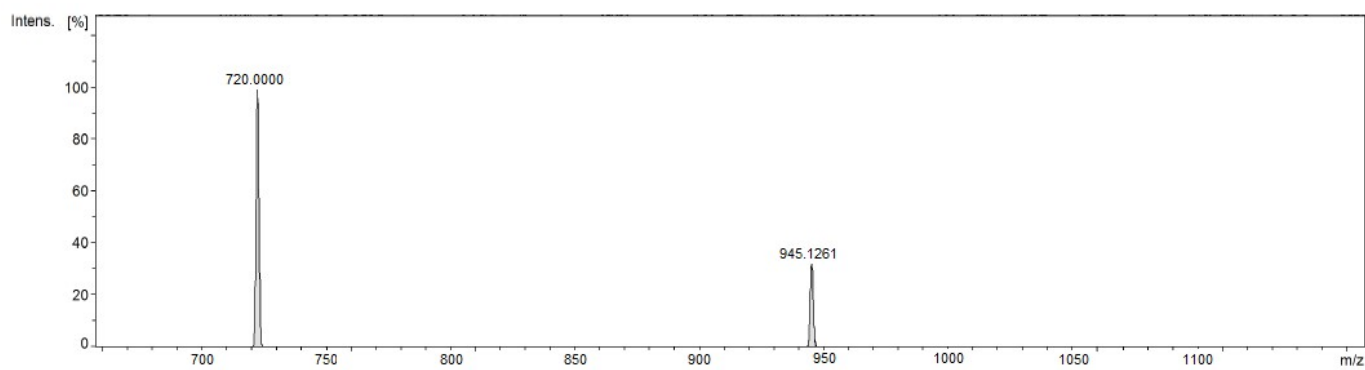

Figure S31. Copy of MALDI TOF spectra of compound 6

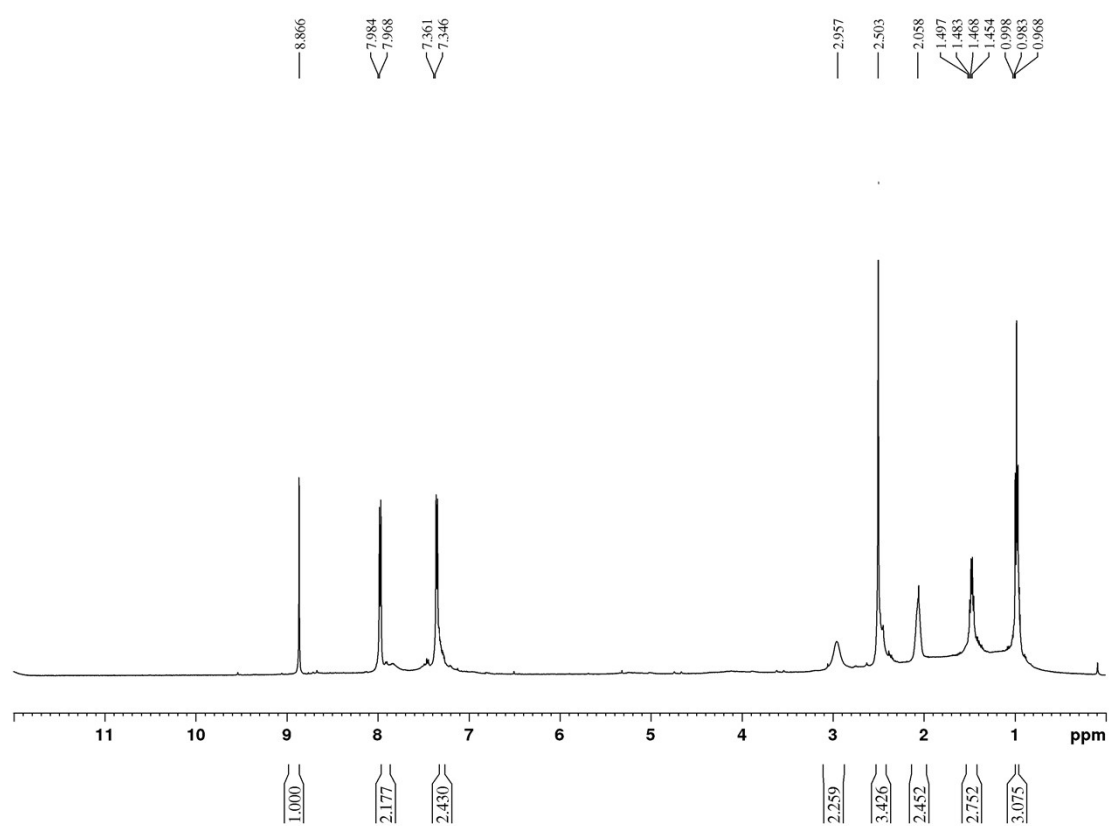

Figure S32. Copy of <sup>1</sup>H NMR spectra of compound 7

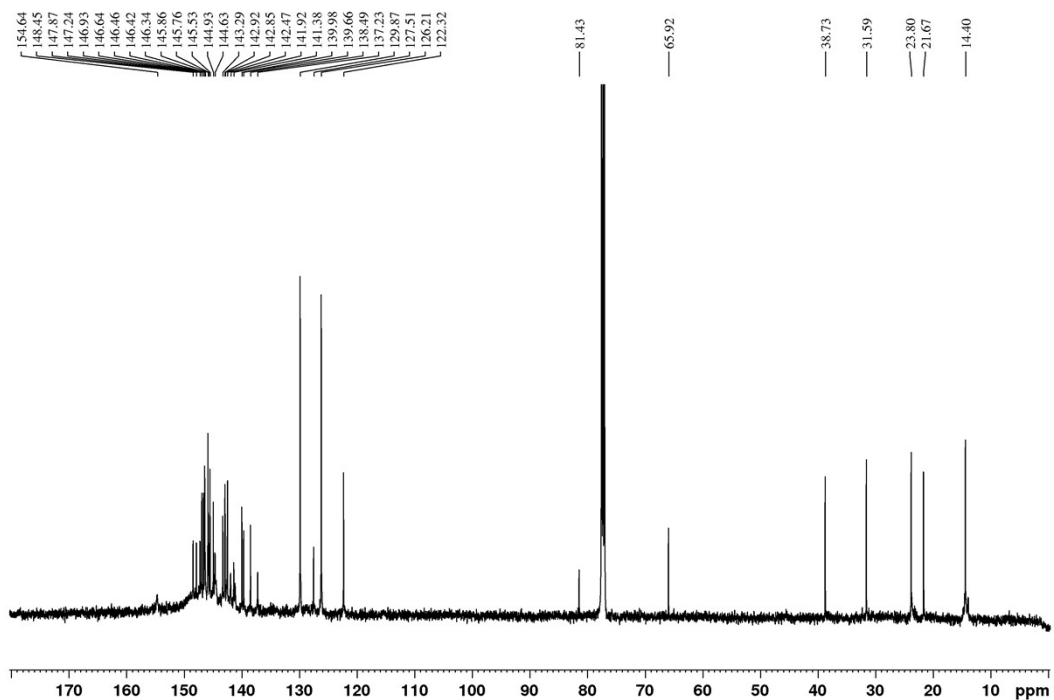

Figure S33. Copy of  $^{13}\text{C}$  NMR spectra of compound 7

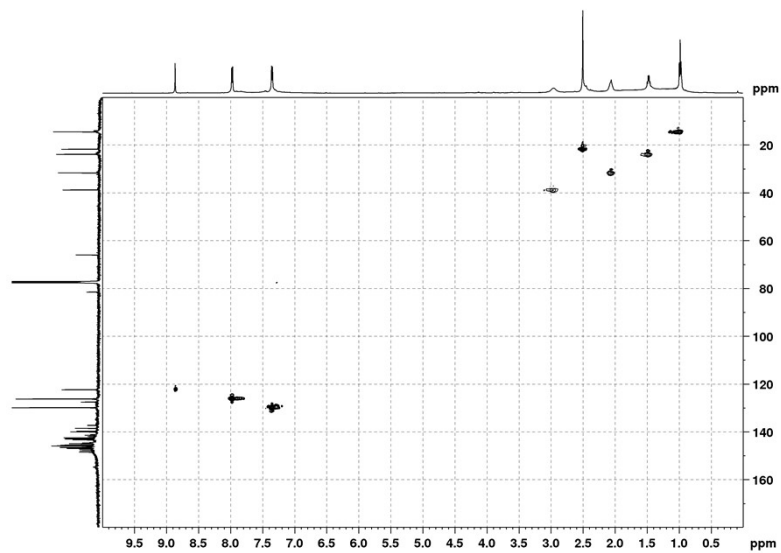

Figure S34. Copy of HSQC spectra of compound 7

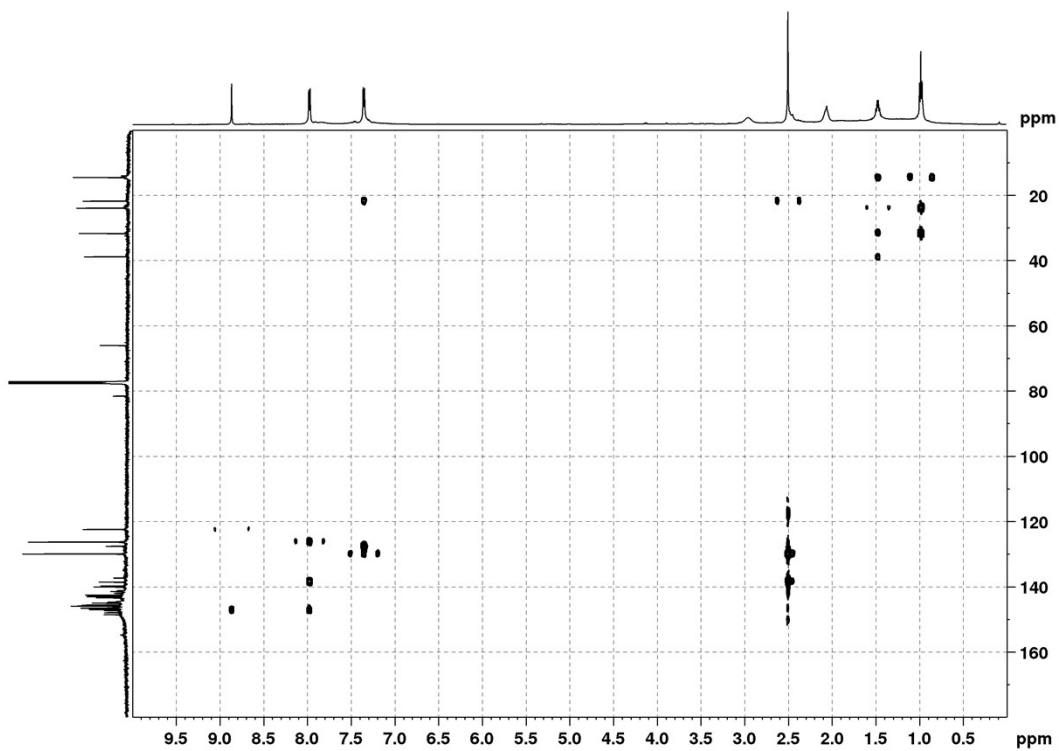

Figure S35. Copy of HMBC spectra of compound 7

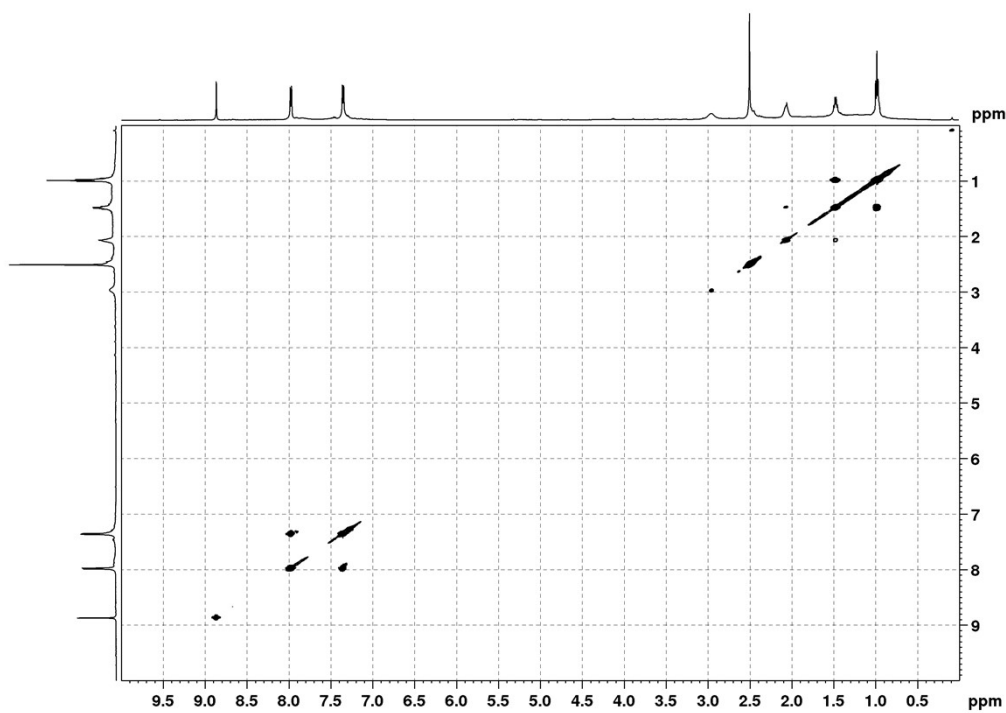

Figure S36. Copy of COSY spectra of compound 7

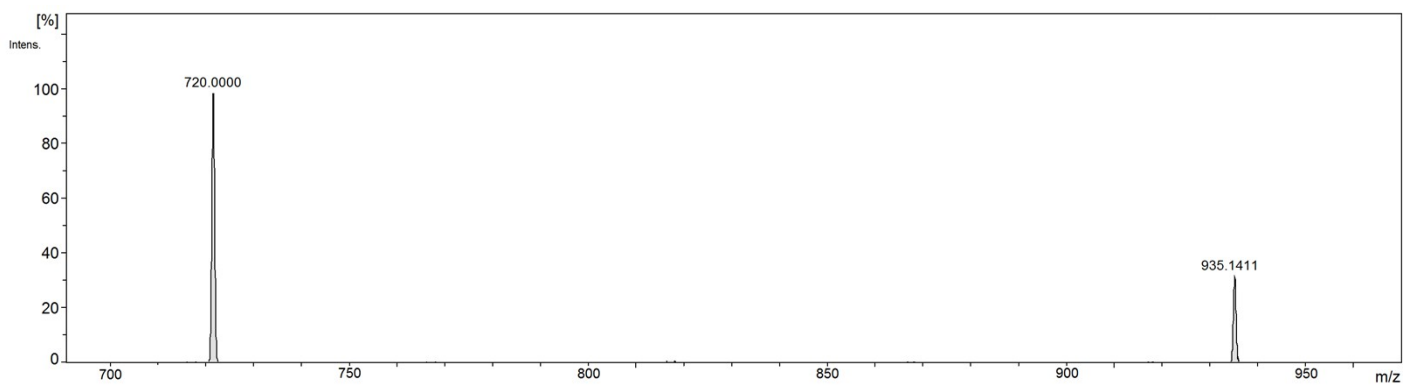

**Figure S37.** Copy of MALDI TOF spectra of compound **7**

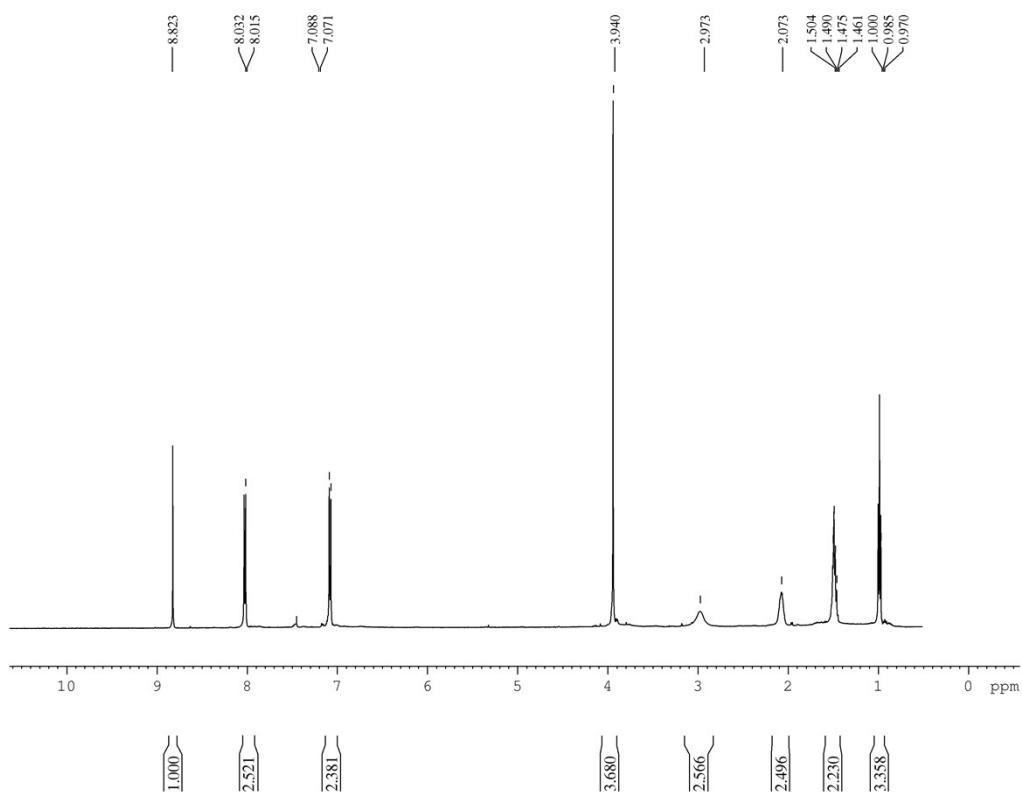

**Figure S38.** Copy of <sup>1</sup>H NMR spectra of compound **8**

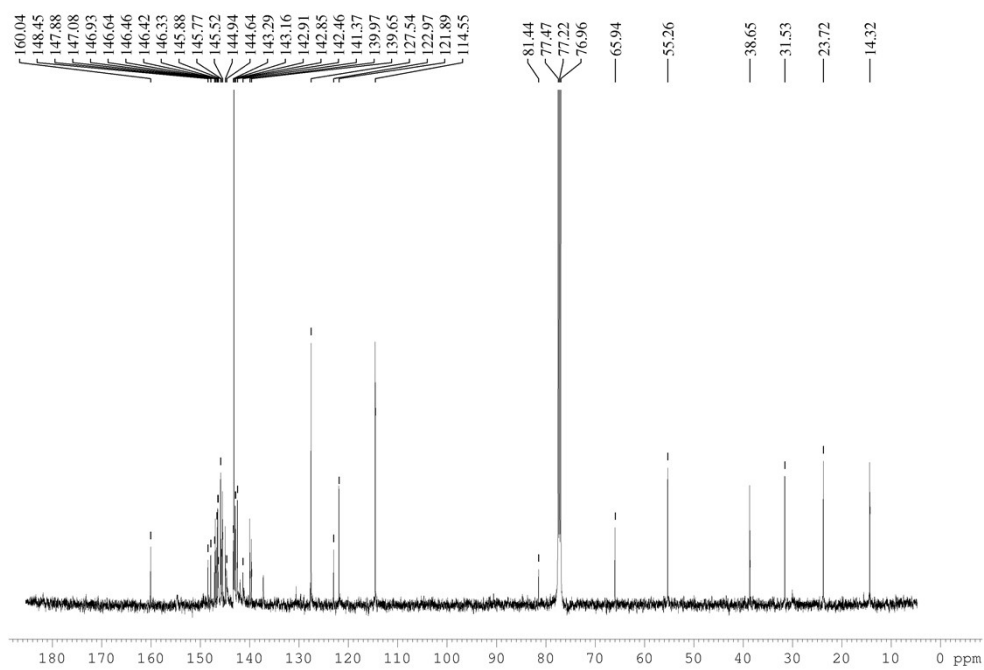

Figure S39. Copy of  $^{13}\text{C}$  NMR spectra of compound 8

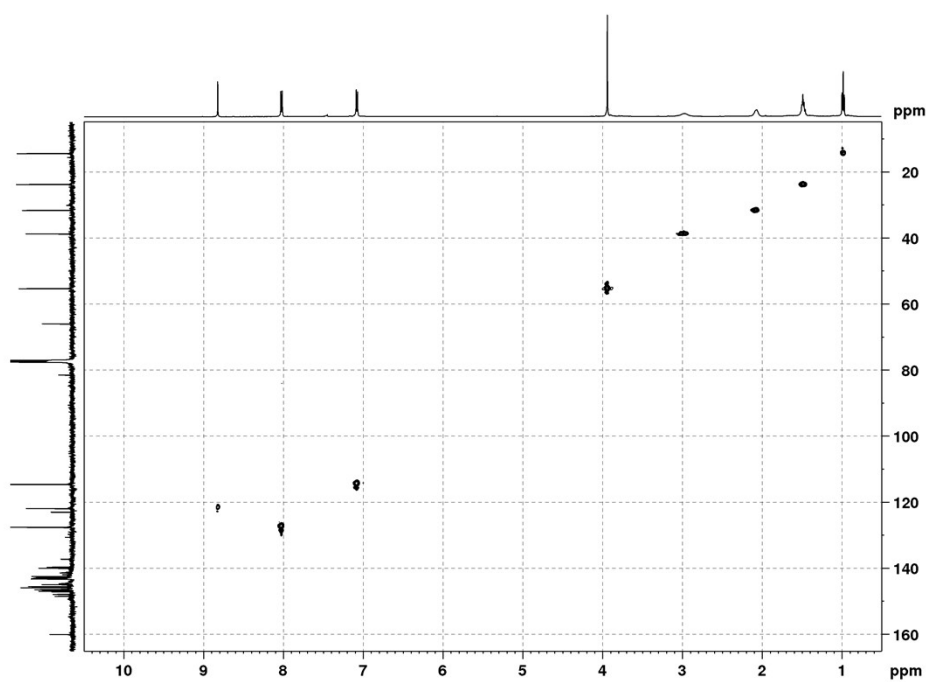

Figure S40. Copy of HSQC NMR spectra of compound 8

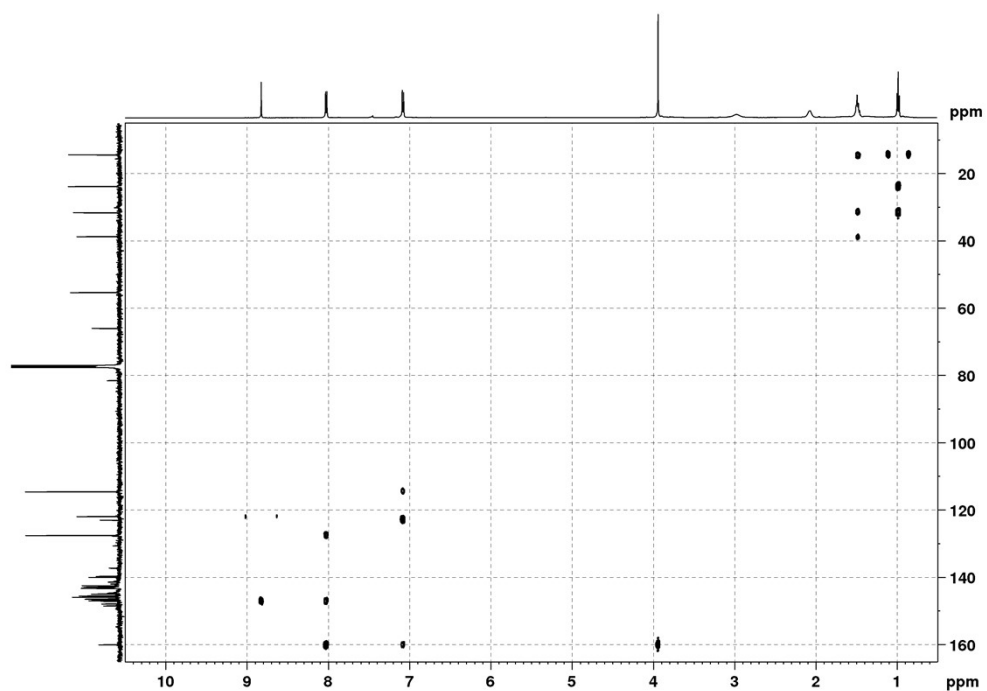

Figure S41. Copy of HMBC NMR spectra of compound 8

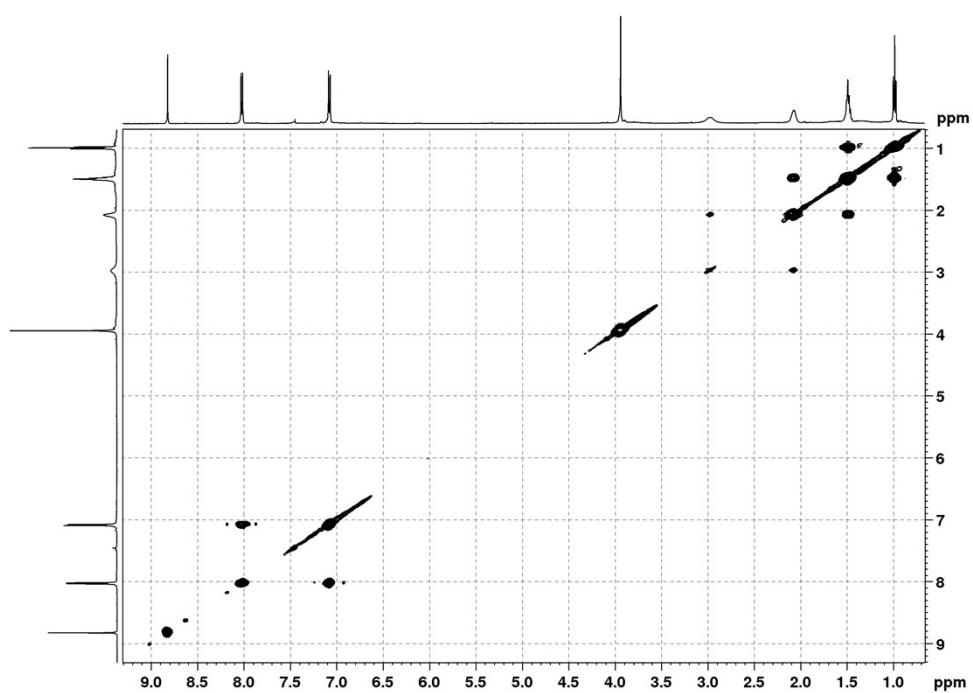

Figure S42. Copy of COSY spectra of compound 8



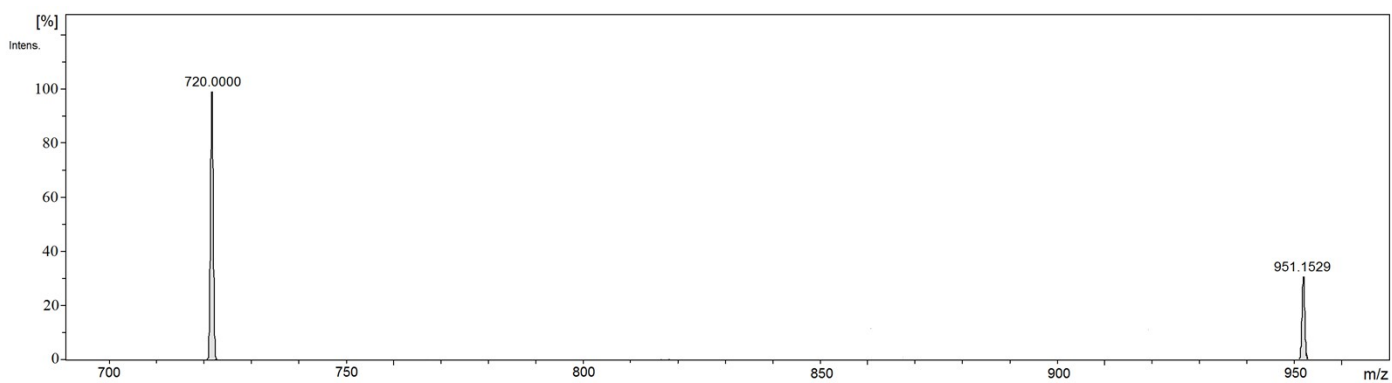

Figure S43. Copy of MALDI TOF spectra of compound 8

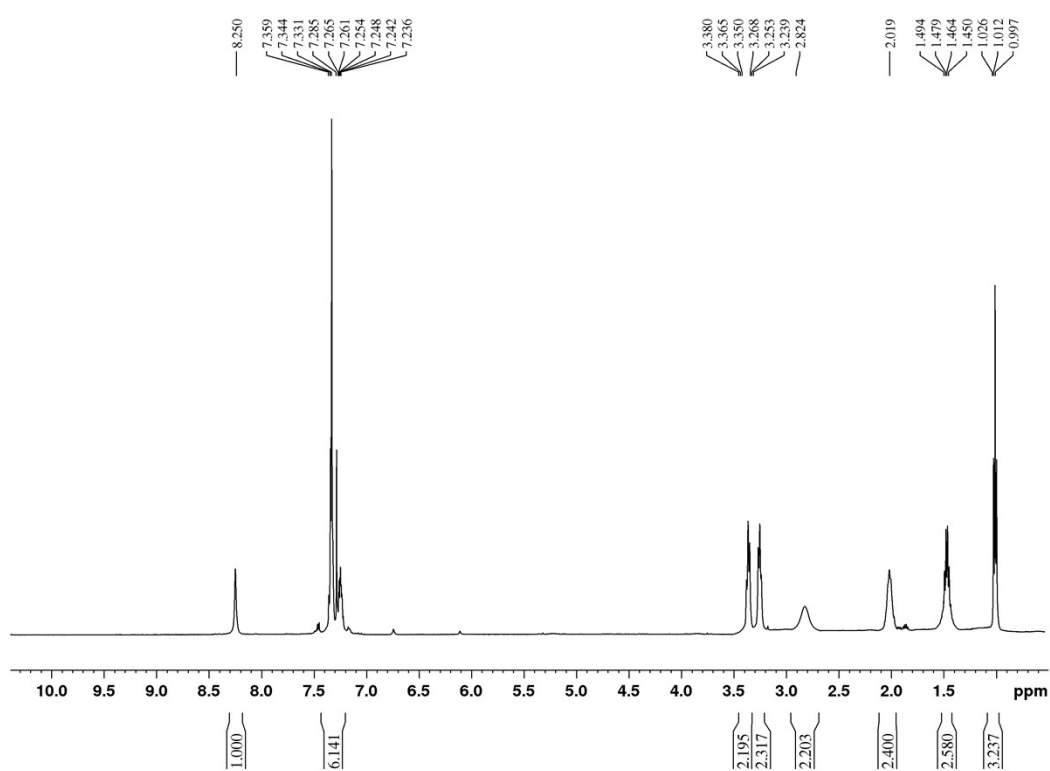

Figure S44. Copy of  $^1\text{H}$  NMR spectra of compound 9

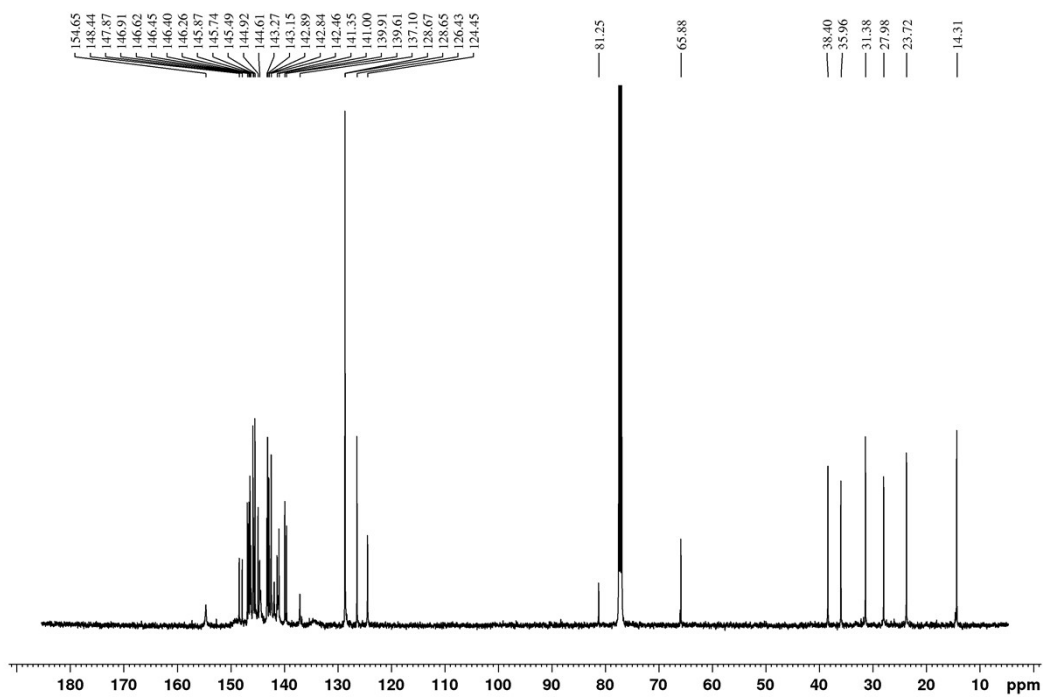

Figure S45. Copy of  $^{13}\text{C}$  NMR spectra of compound **9**

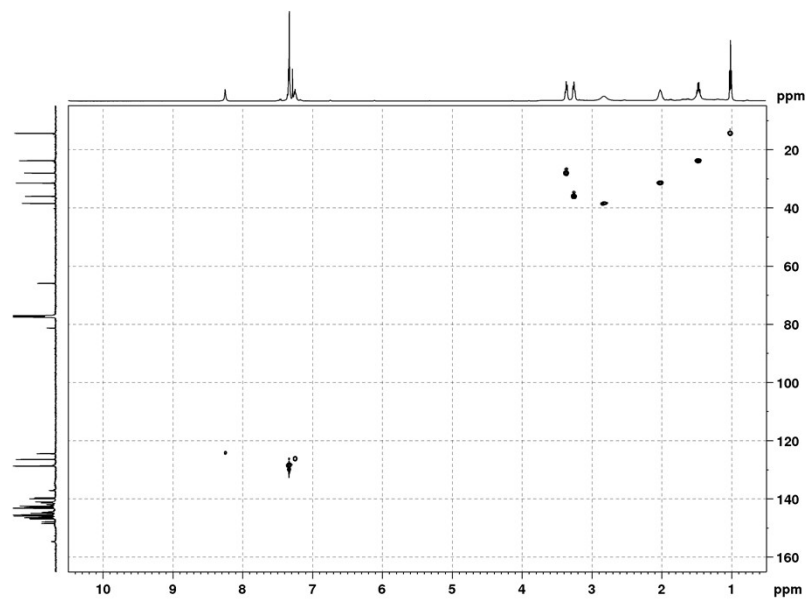

Figure S46. Copy of HSQC NMR spectra of compound **9**

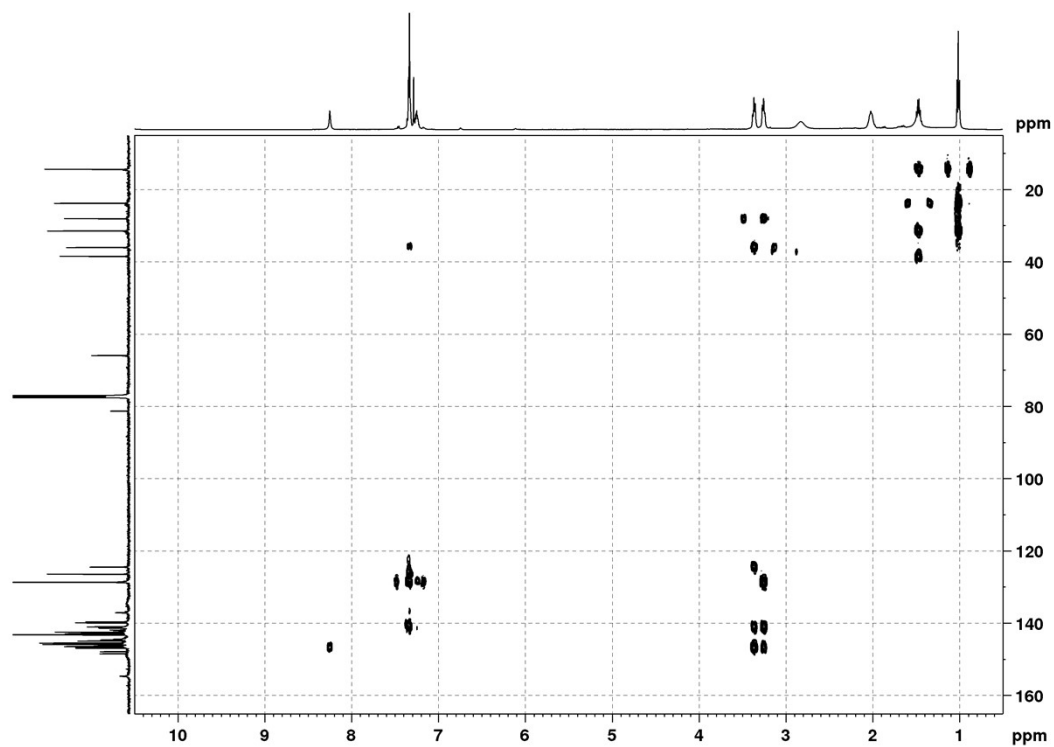

Figure S47. Copy of HMBC NMR spectra of compound 9

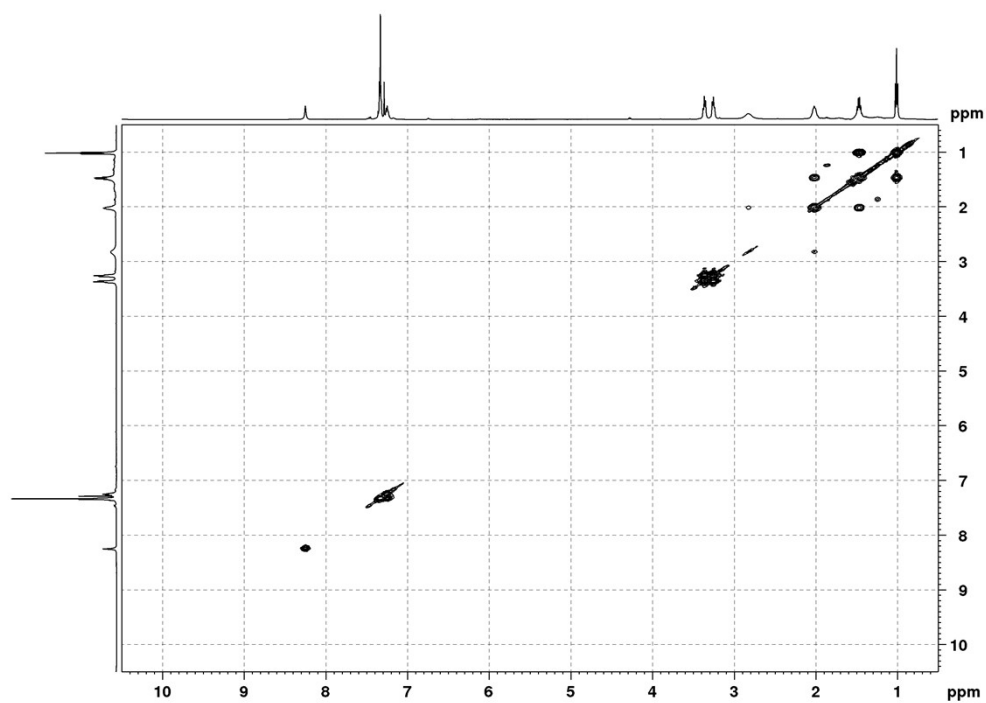

Figure S48. Copy of COSY NMR spectra of compound 9

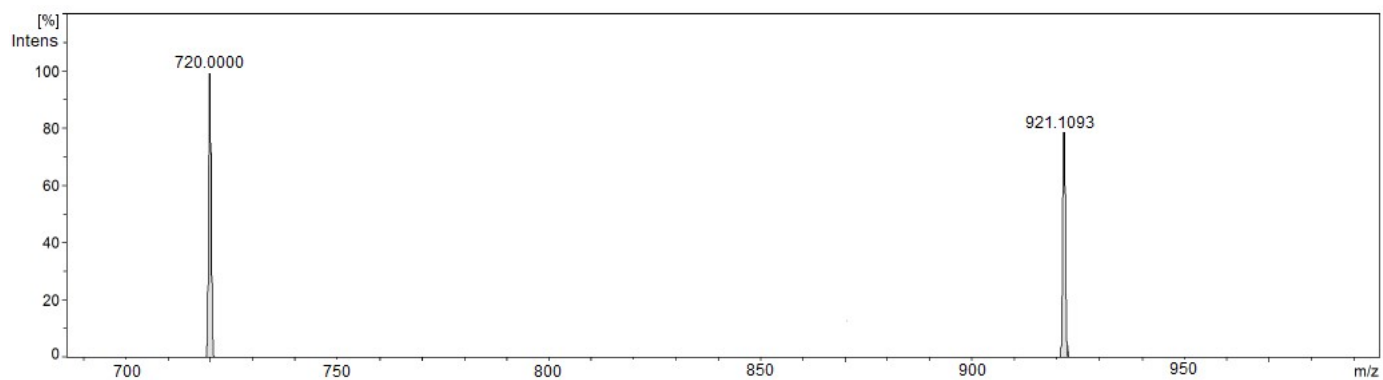

**Figure S49.** Copy of MALDI TOF spectra of compound **9**

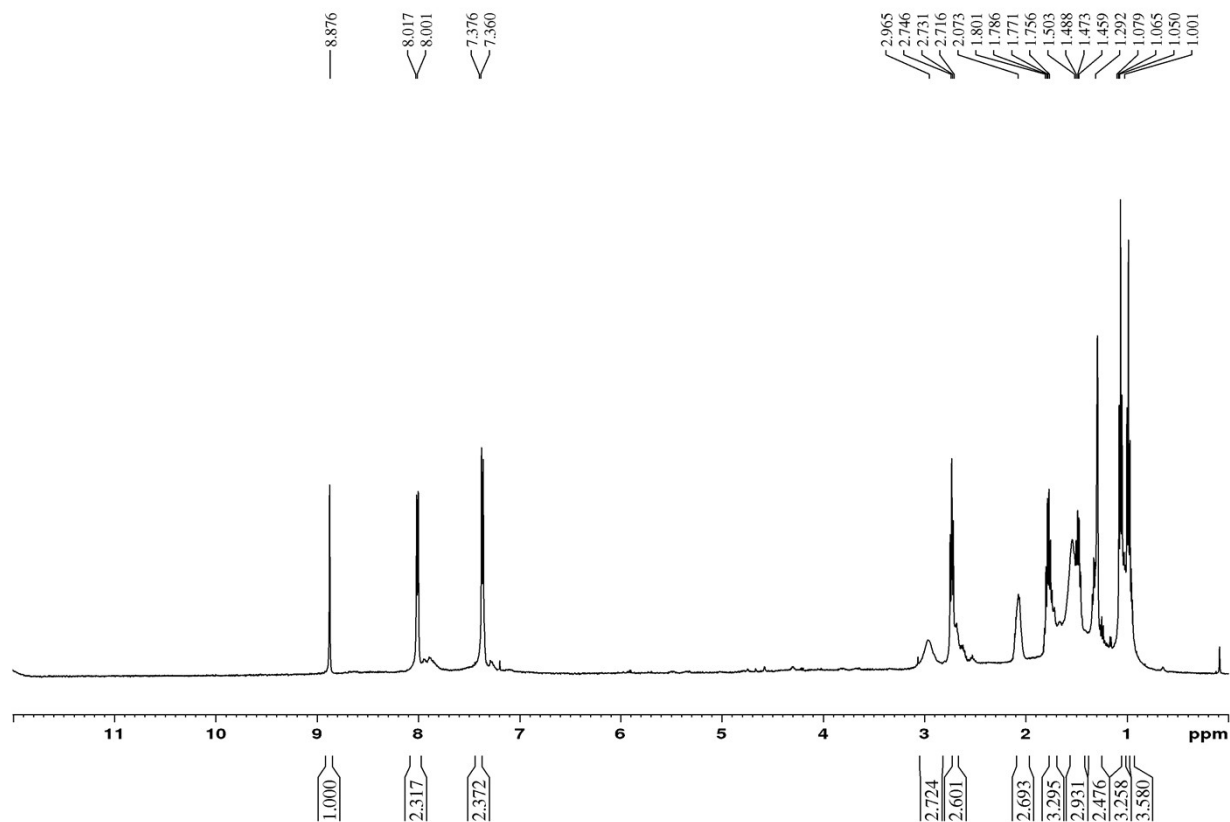

**Figure S50.** Copy of <sup>1</sup>H NMR spectra of compound **10**

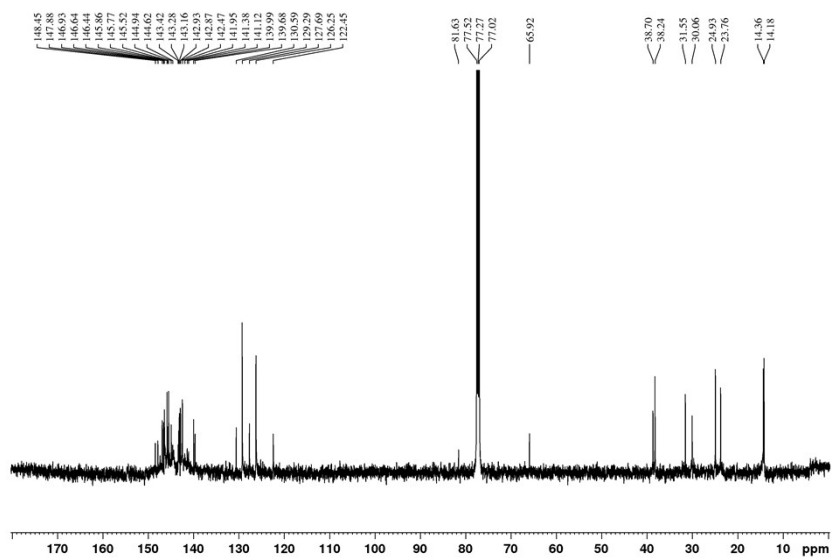

Figure S51. Copy of  $^{13}\text{C}$  NMR spectra of compound 10

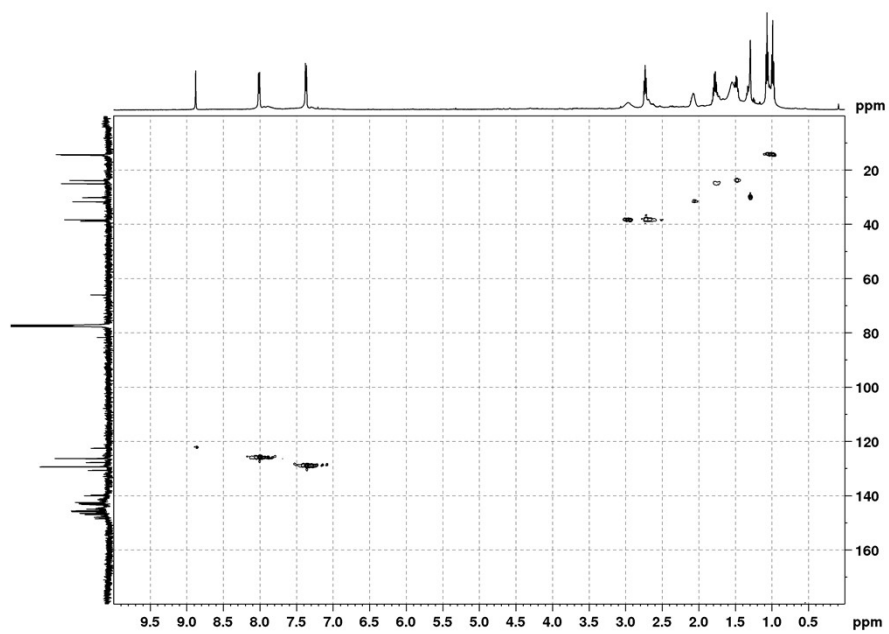

Figure S52. Copy of HSQC NMR spectra of compound 10

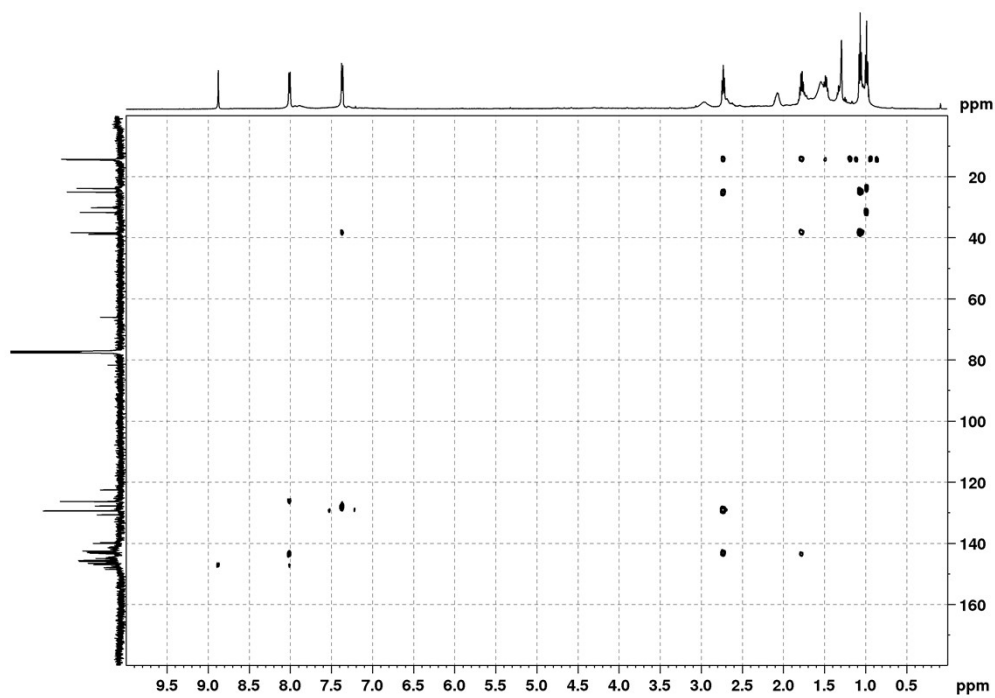

Figure S53. Copy of HMBC NMR spectra of compound **10**

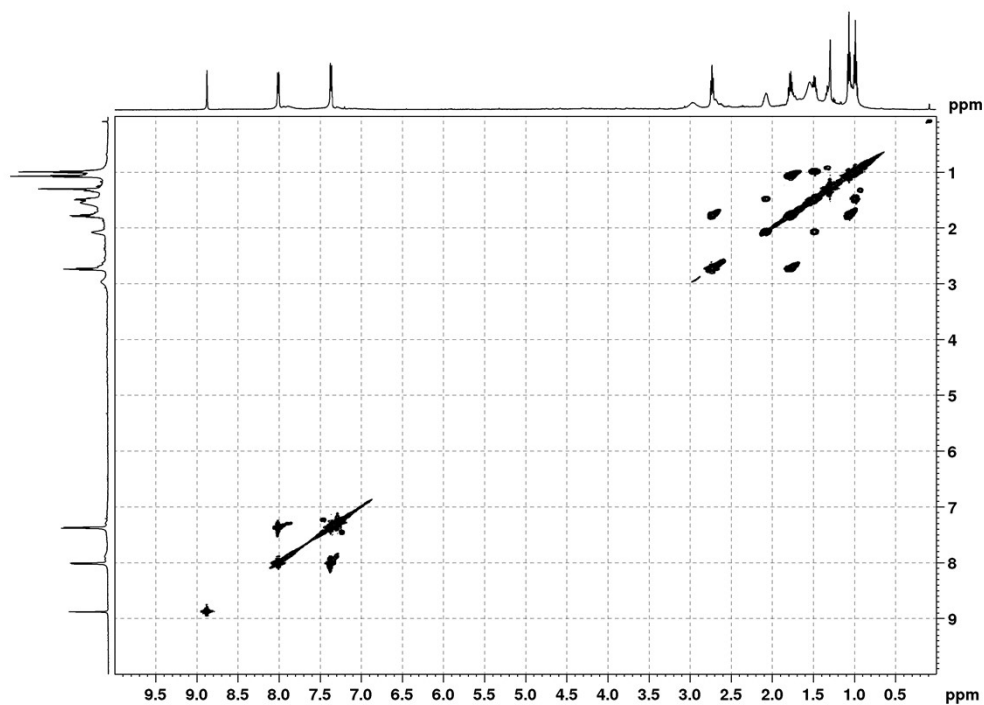

Figure S54. Copy of COSY NMR spectra of compound **10**

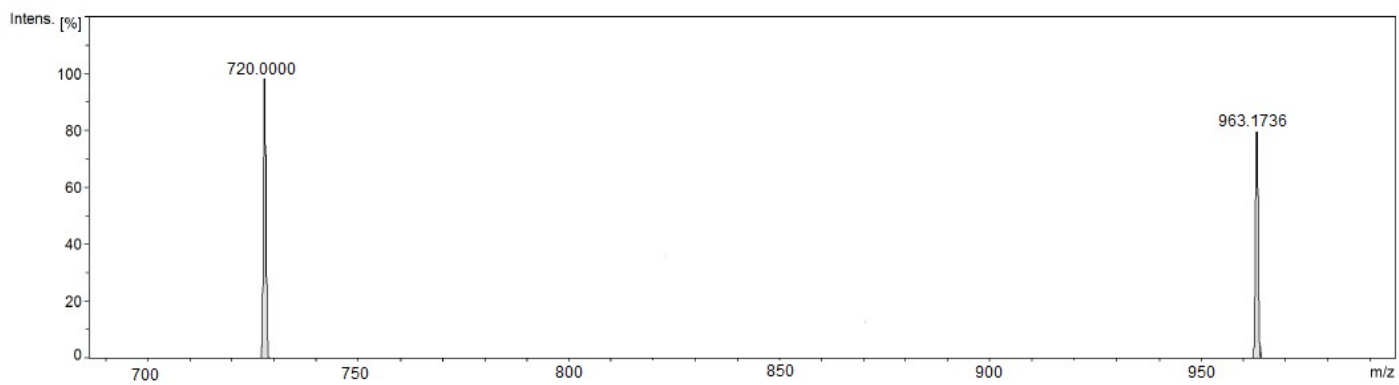

Figure S55. Copy of MALDI TOF spectra of compound 10

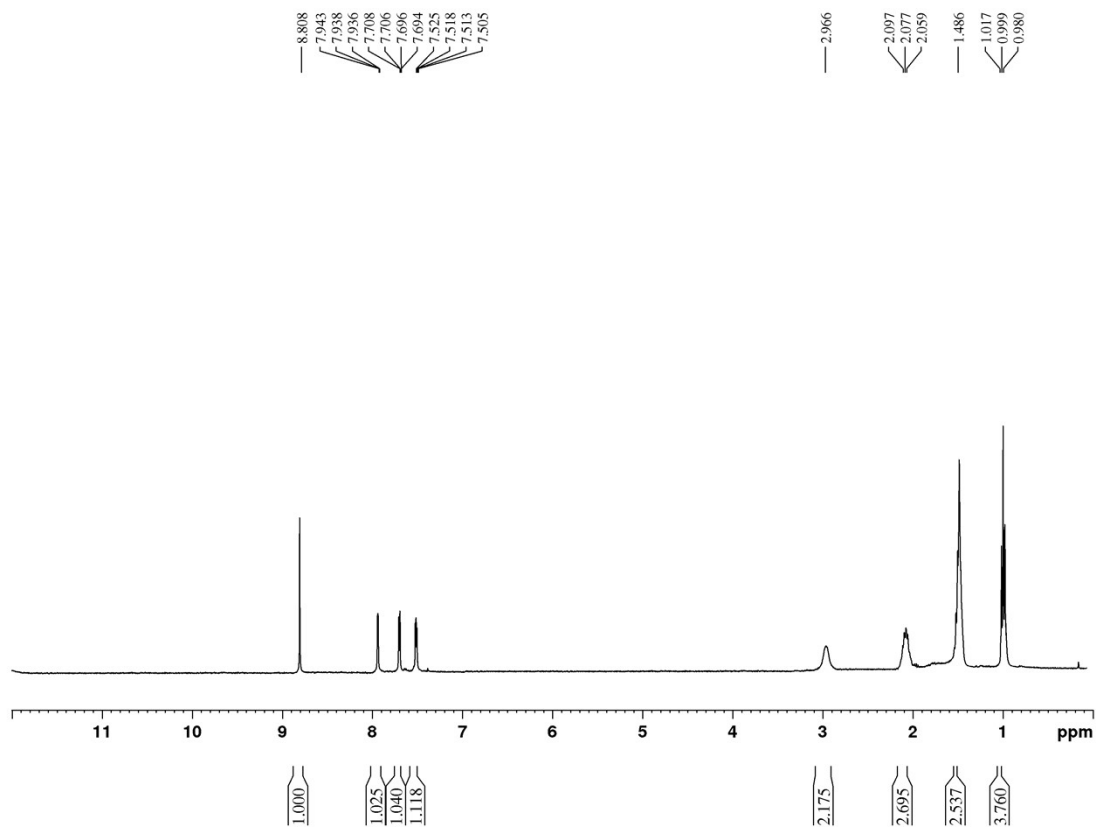

Figure S56. Copy of <sup>1</sup>H NMR spectra of compound 11

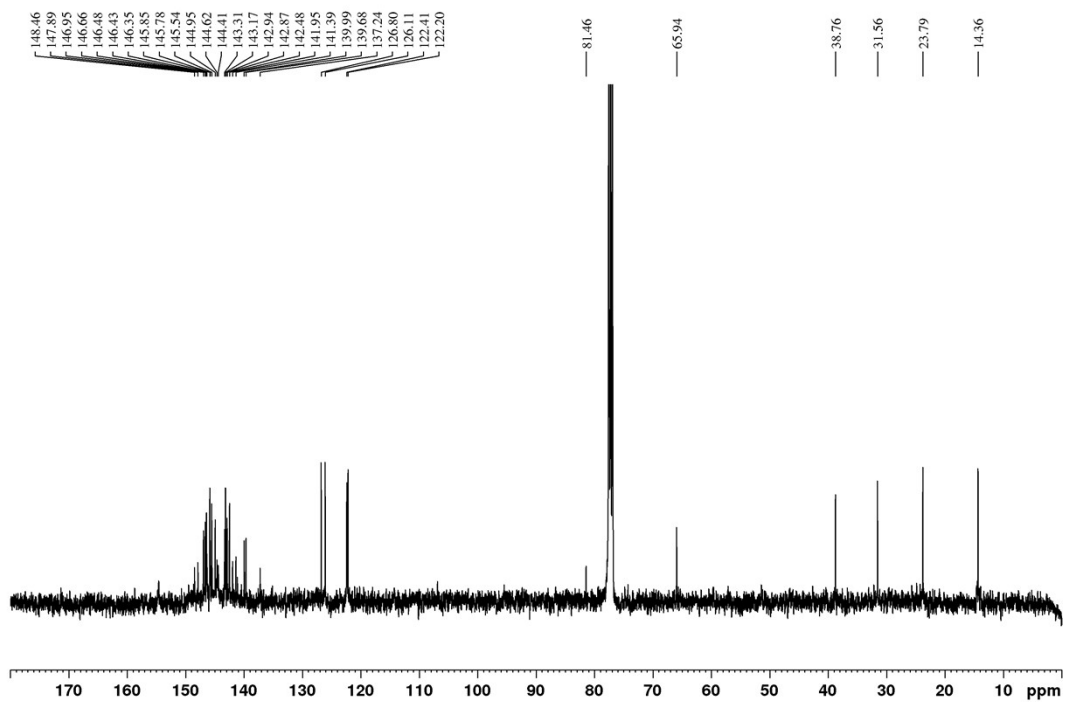

Figure S57. Copy of  $^{13}\text{C}$  NMR spectra of compound 11

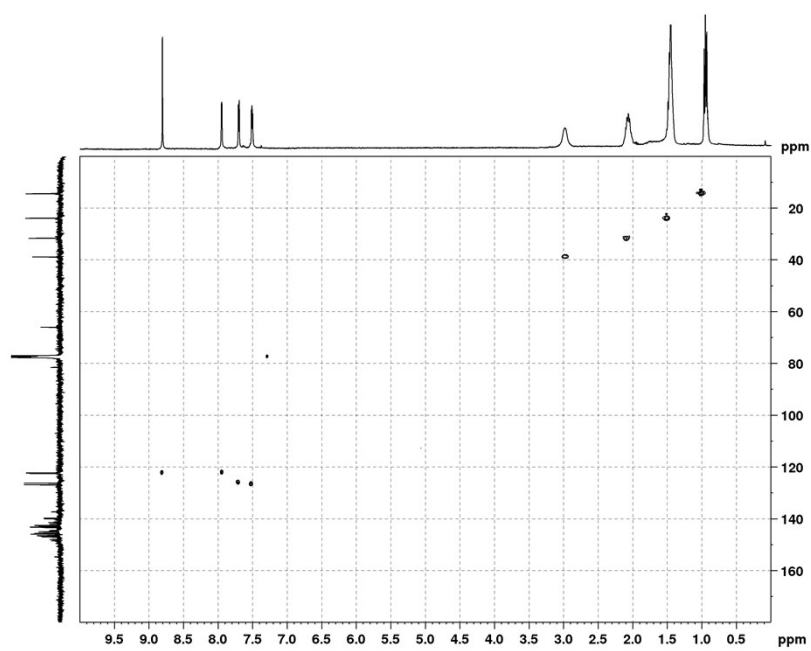

Figure S58. Copy of HSQC NMR spectra of compound 11



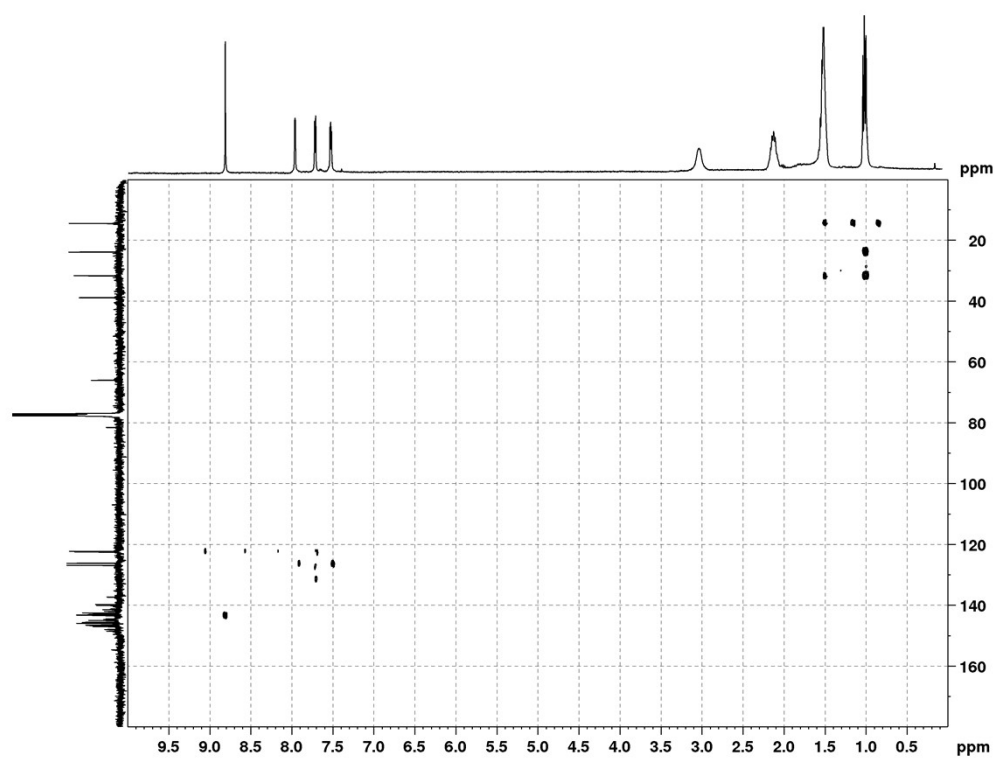

**Figure S59.** Copy of HMBC NMR spectra of compound **11**

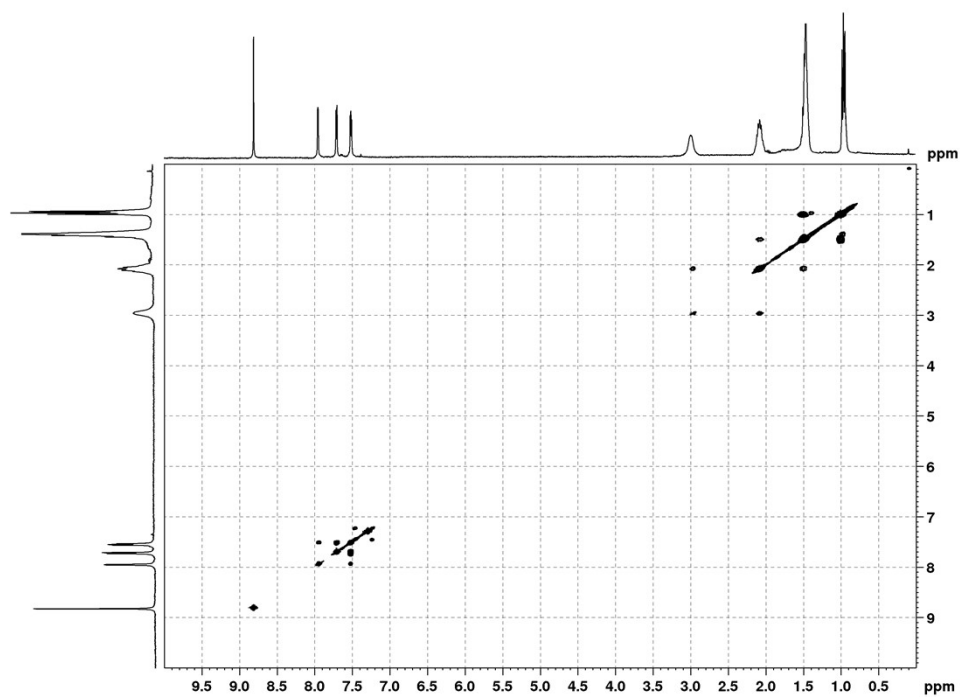

**Figure S60.** Copy of COSY NMR spectra of compound **11**

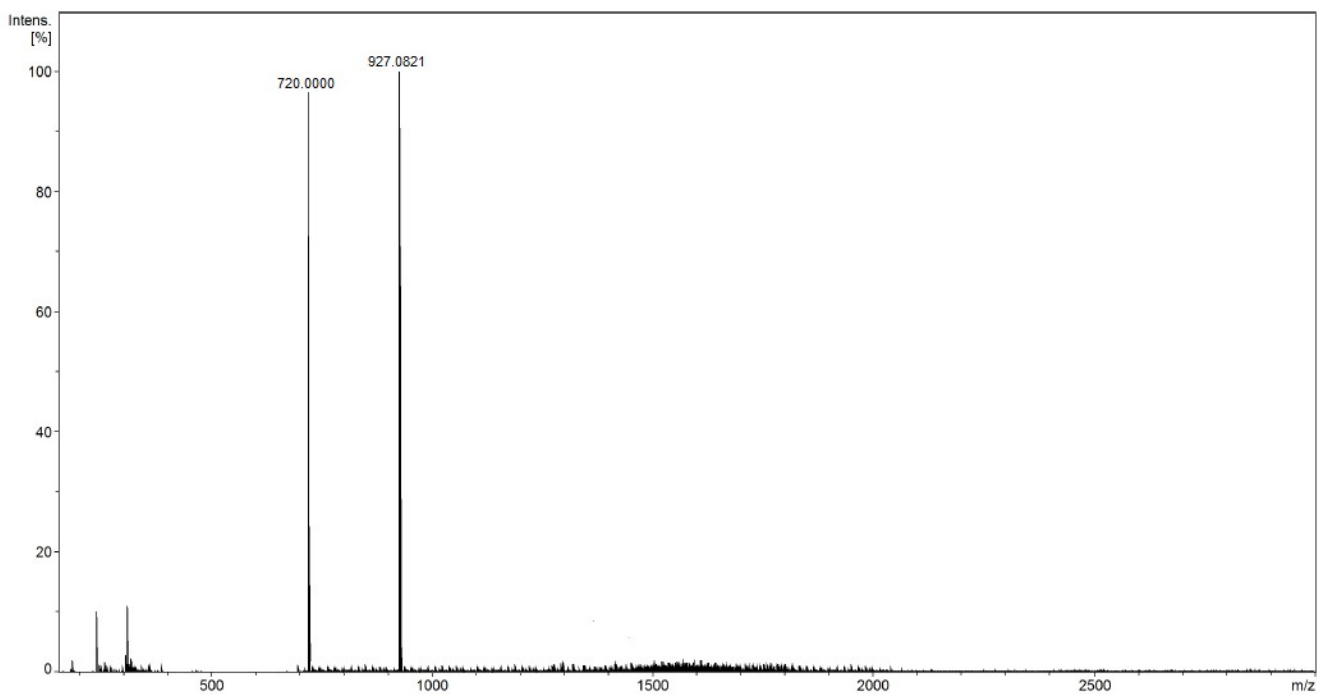

Figure S61. Copy of MALDI TOF spectra of compound 11

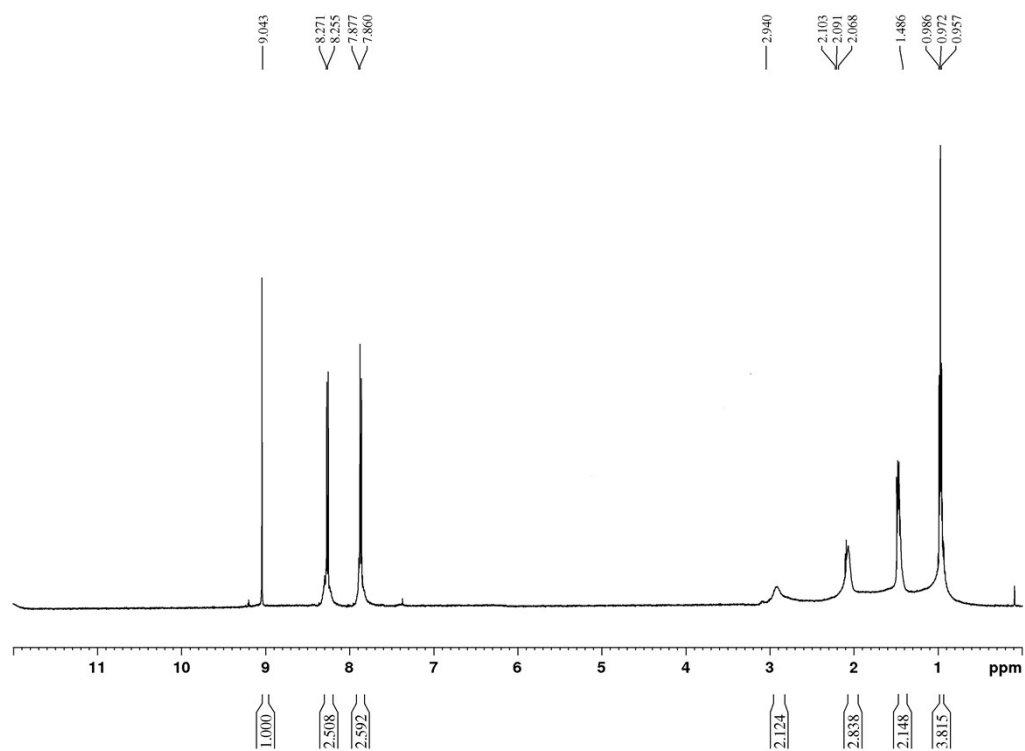

Figure S62. Copy of <sup>1</sup>H NMR spectra of compound 12

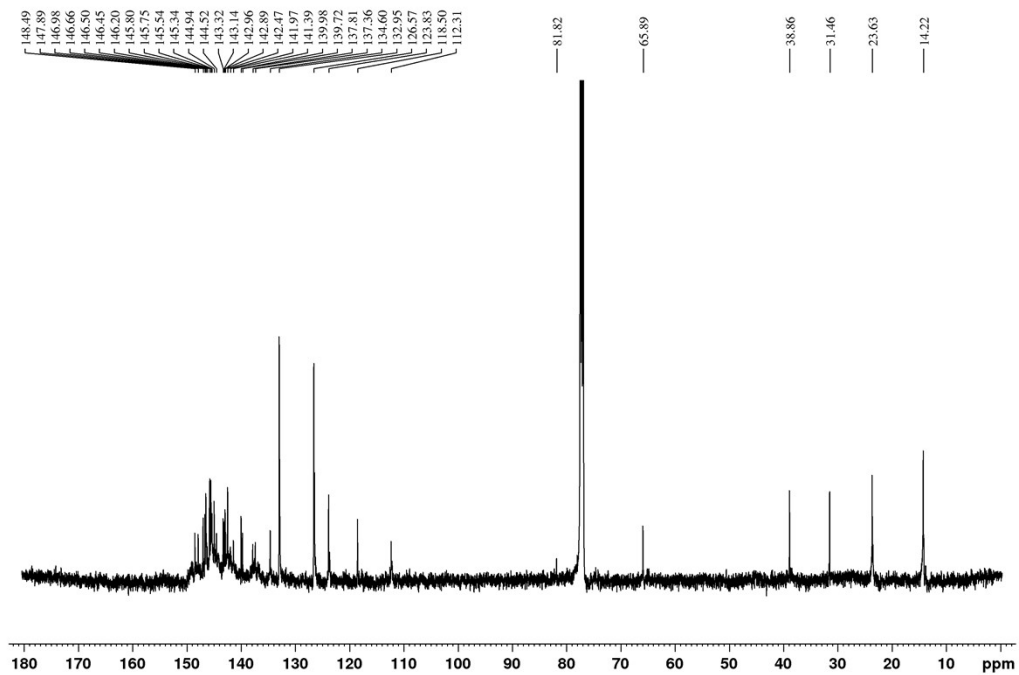

Figure S63. Copy of  $^{13}\text{C}$  NMR spectra of compound 12

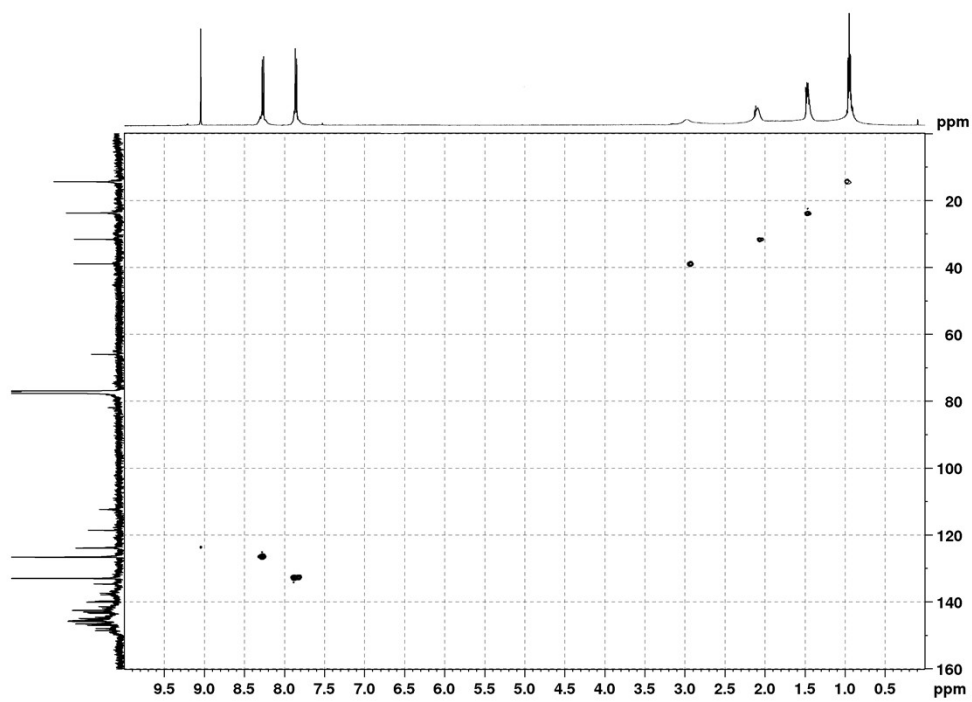

Figure S64. Copy of HSQC NMR spectra of compound 12

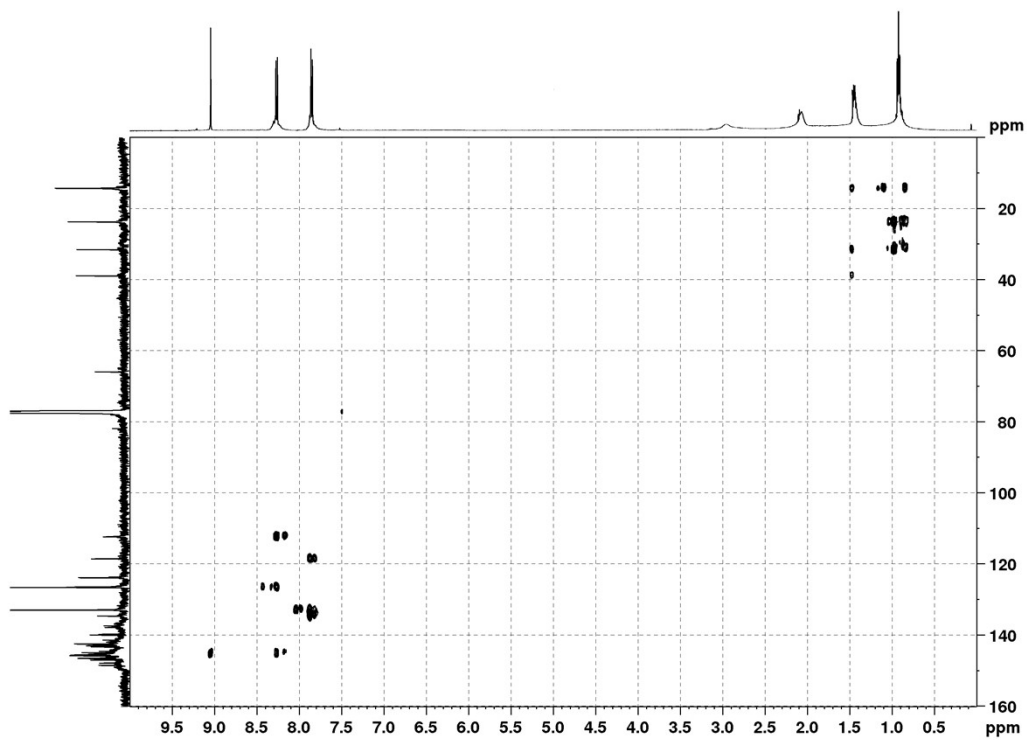

Figure S65. Copy of HMBC NMR spectra of compound 12

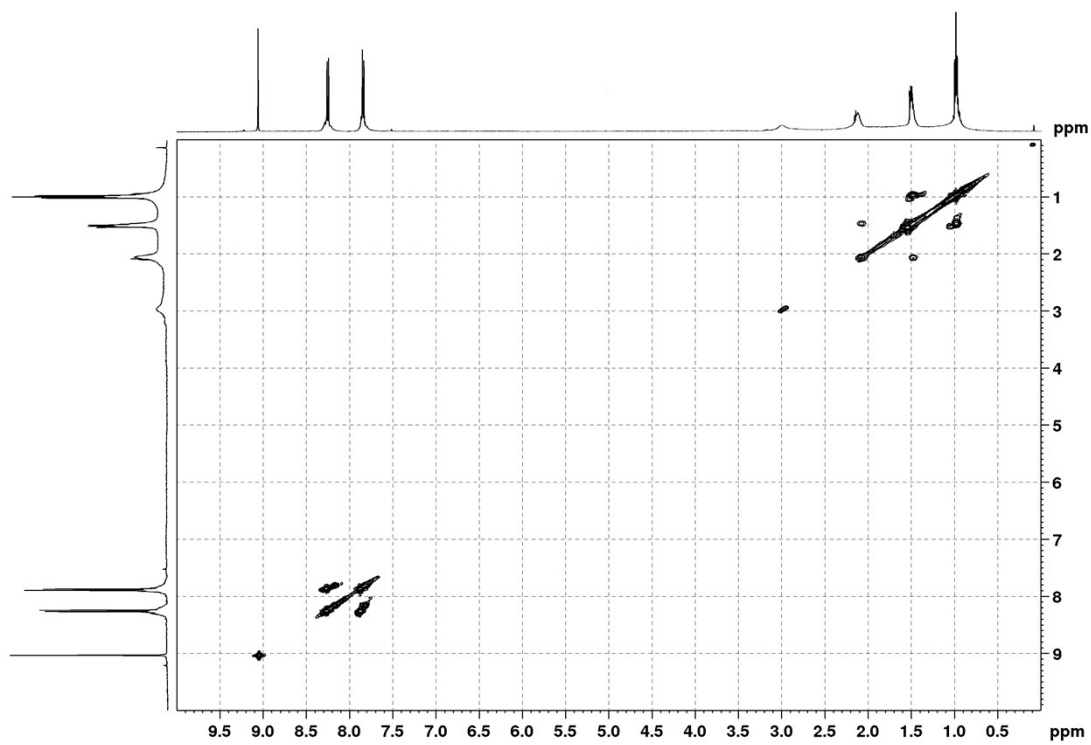

Figure S66. Copy of COSY NMR spectra of compound 12

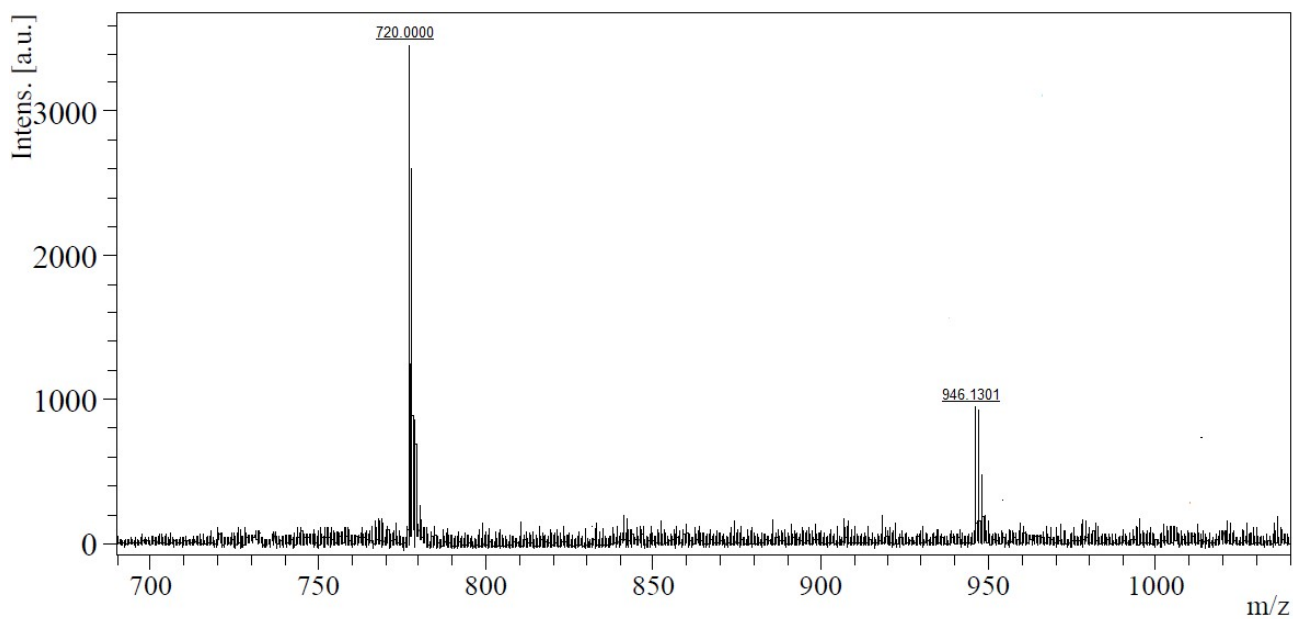

Figure S67. Copy of MALDI TOF spectra of compound 12

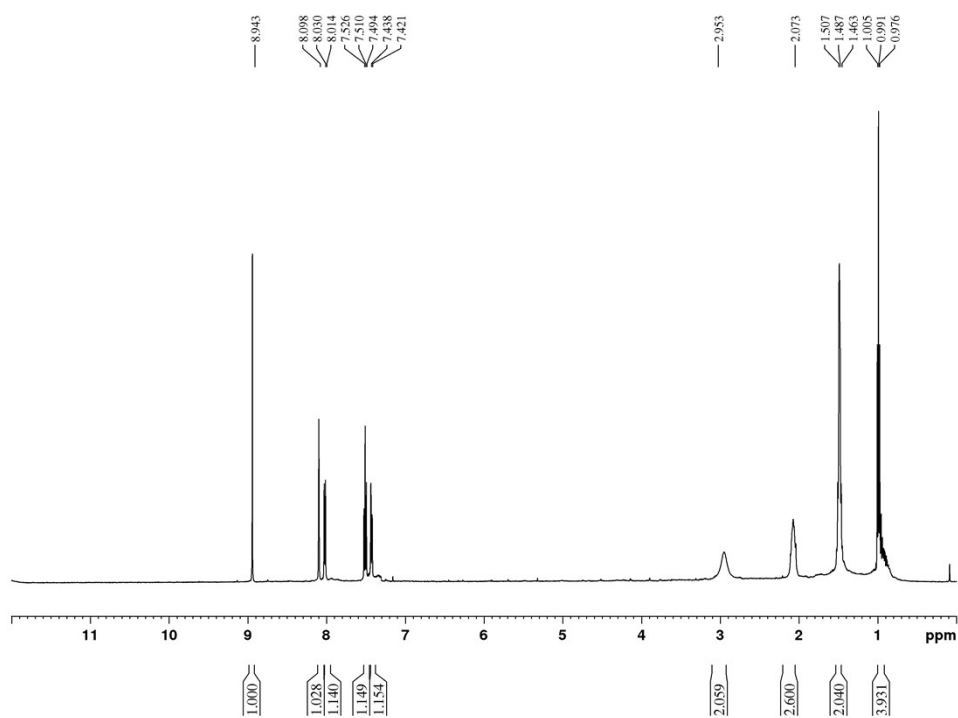

Figure S68. Copy of <sup>1</sup>H NMR spectra of compound 13

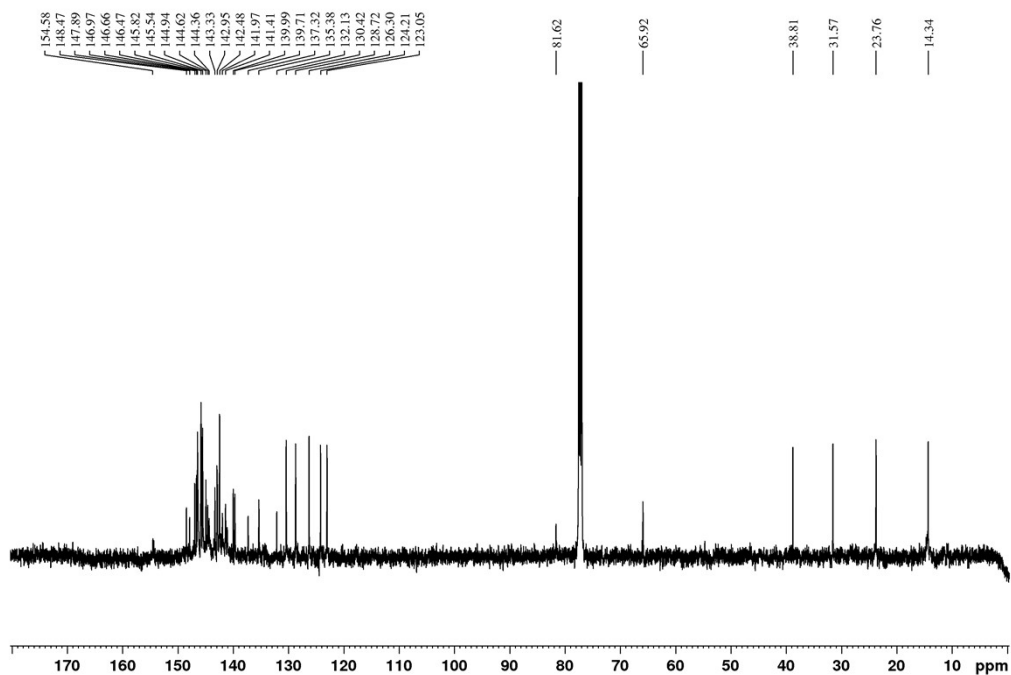

Figure S69. Copy of  $^{13}\text{C}$  NMR spectra of compound **13**

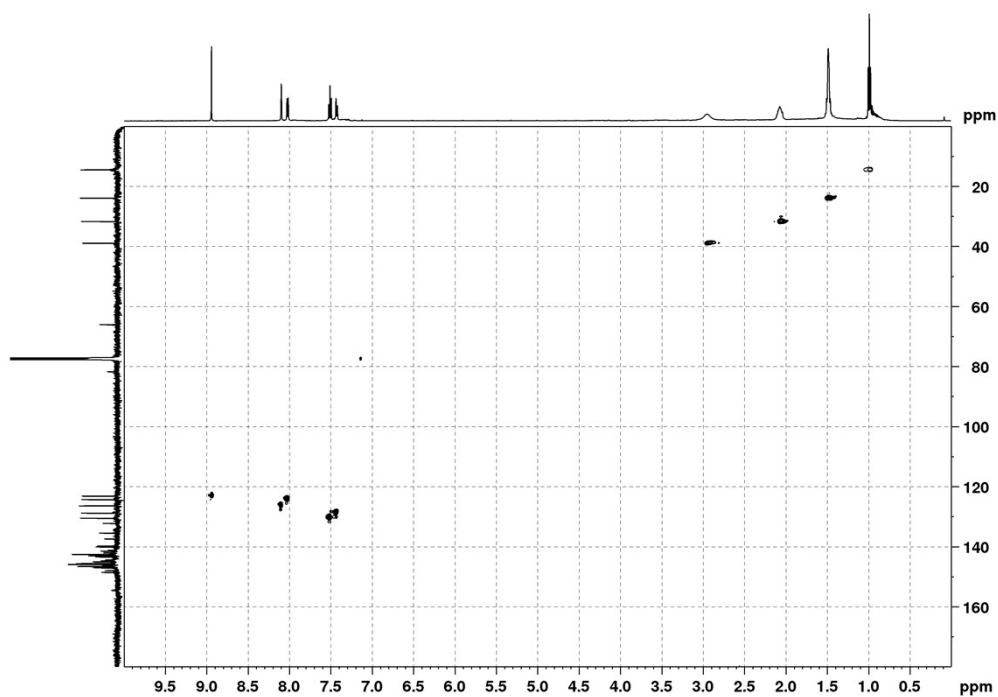

Figure S70. Copy of HSQC NMR spectra of compound **13**

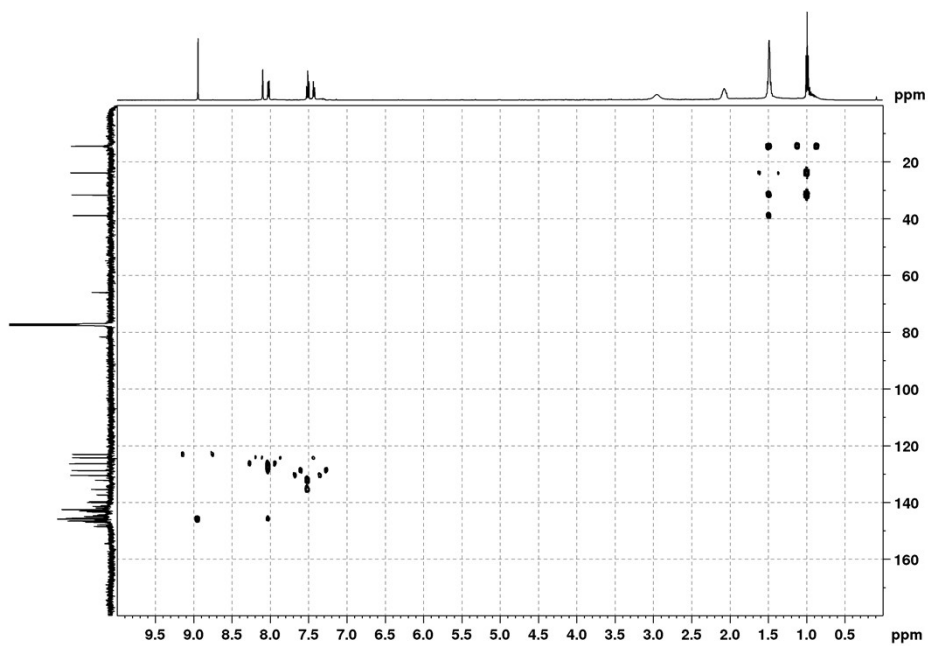

**Figure S71.** Copy of HMBC NMR spectra of compound **13**

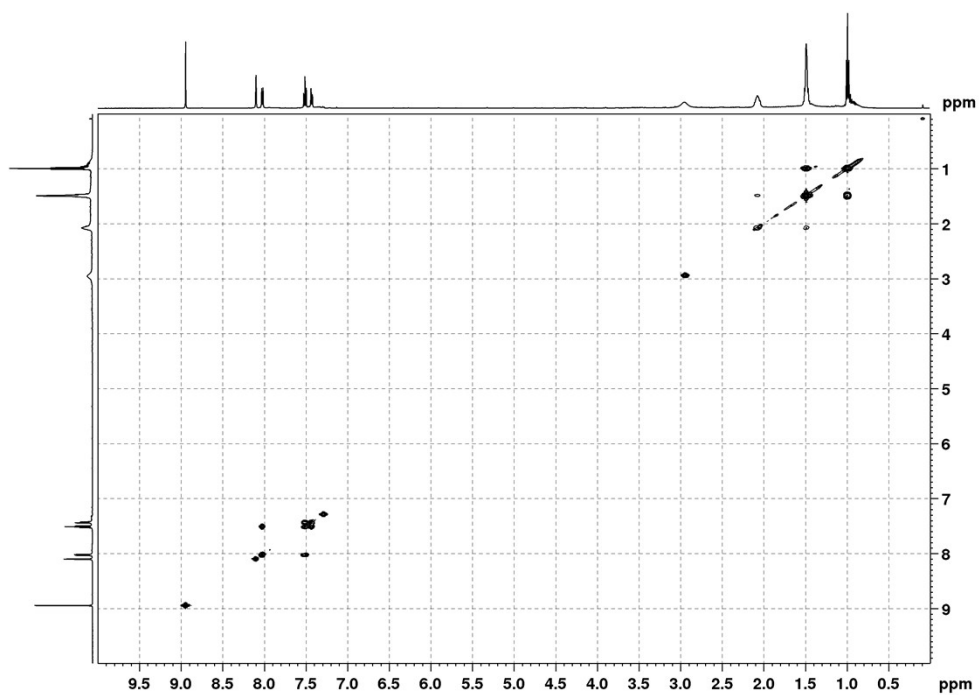

**Figure S72.** Copy of COSY NMR spectra of compound **13**

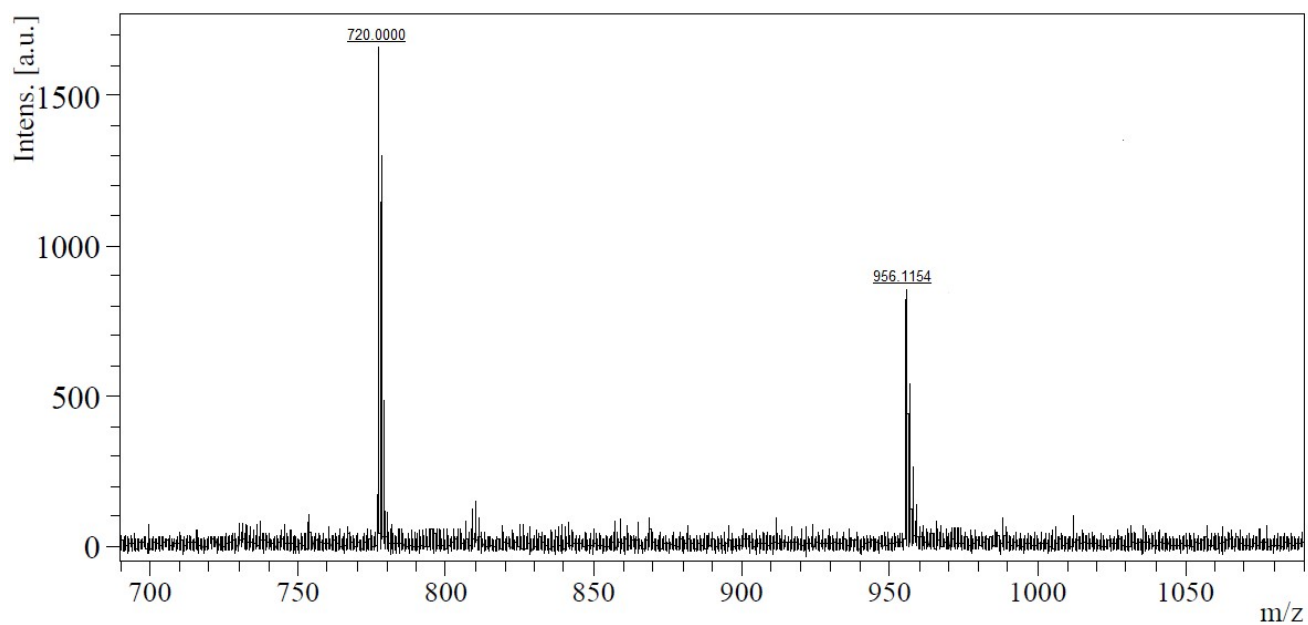

Figure S73. Copy of MALDI TOF spectra of compound 13

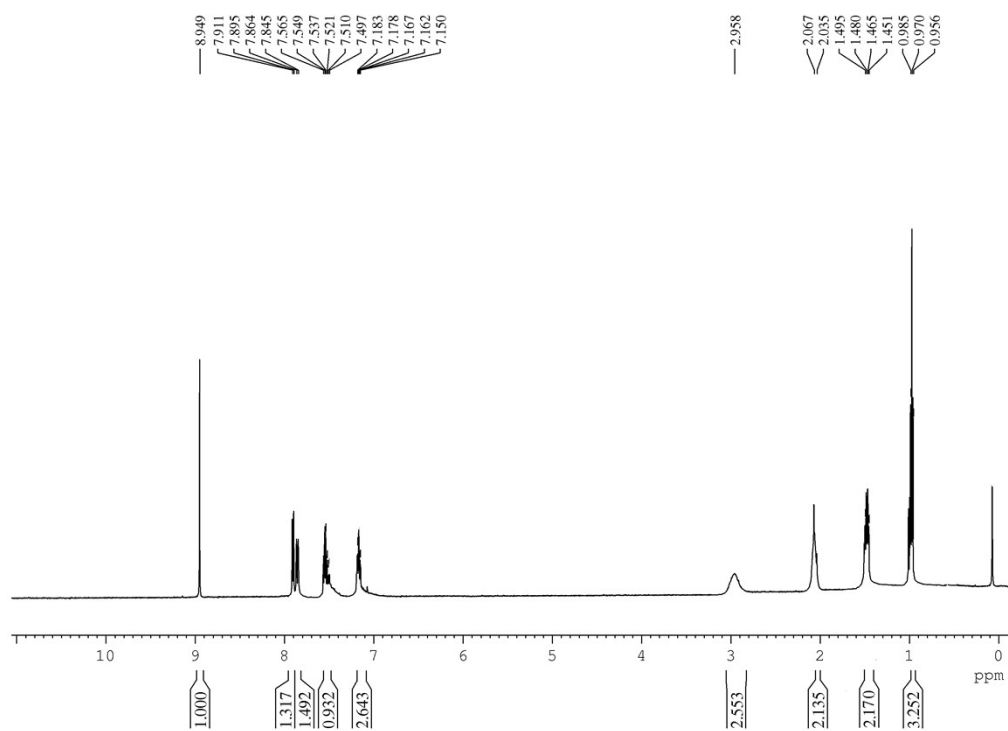

Figure S74. Copy of <sup>1</sup>H NMR spectra of compound 14



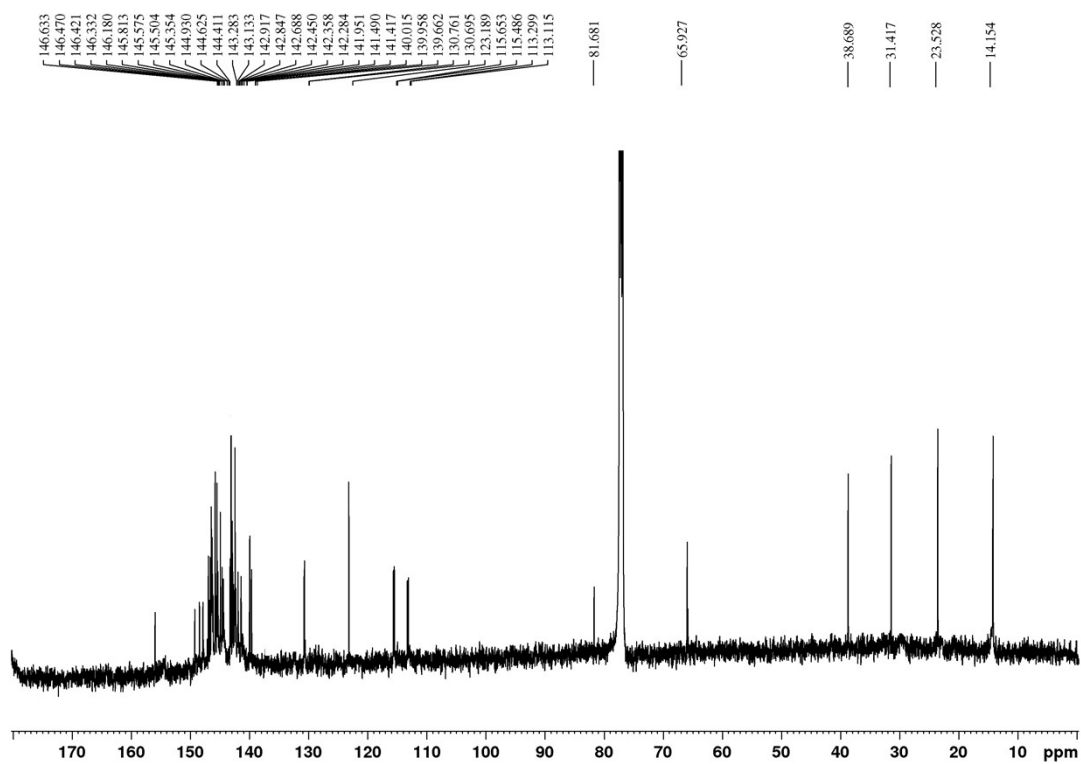

Figure S75. Copy of  $^{13}\text{C}$  NMR spectra of compound 14

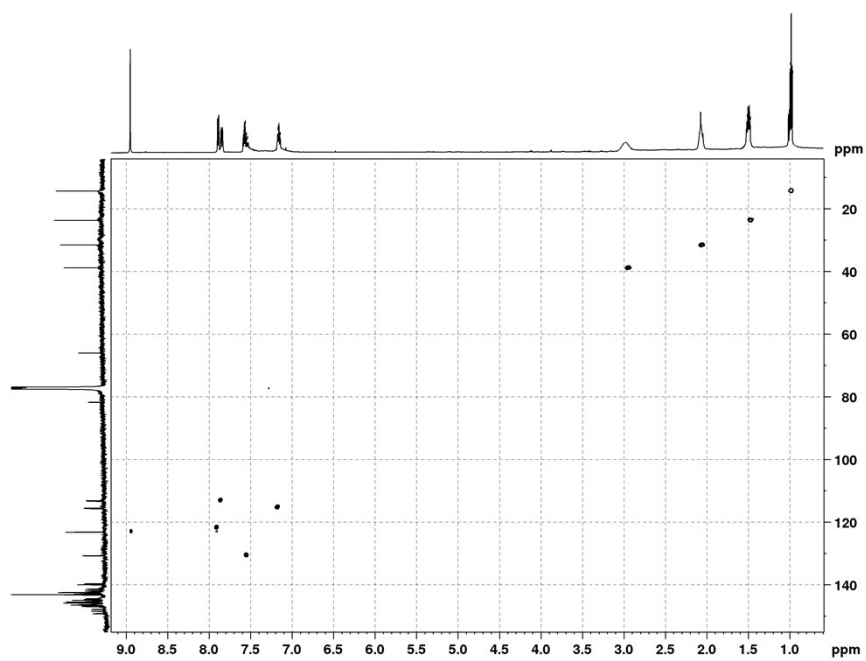

Figure S76. Copy of HSQC NMR spectra of compound 14

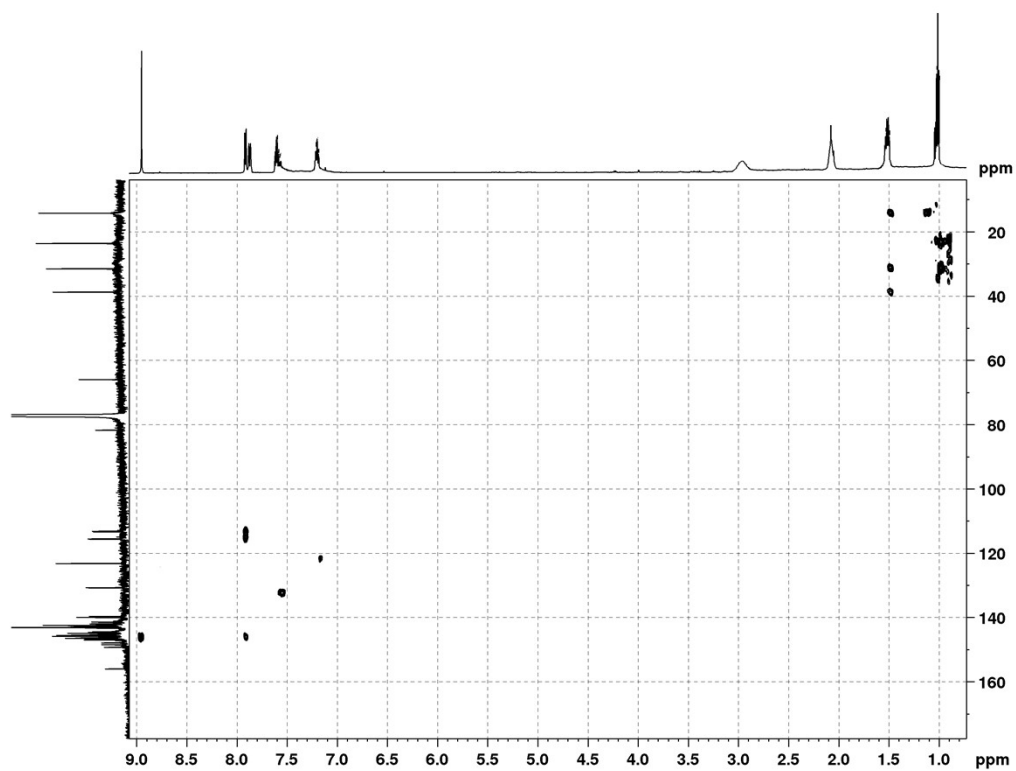

Figure S77. Copy of HMBC NMR spectra of compound 14

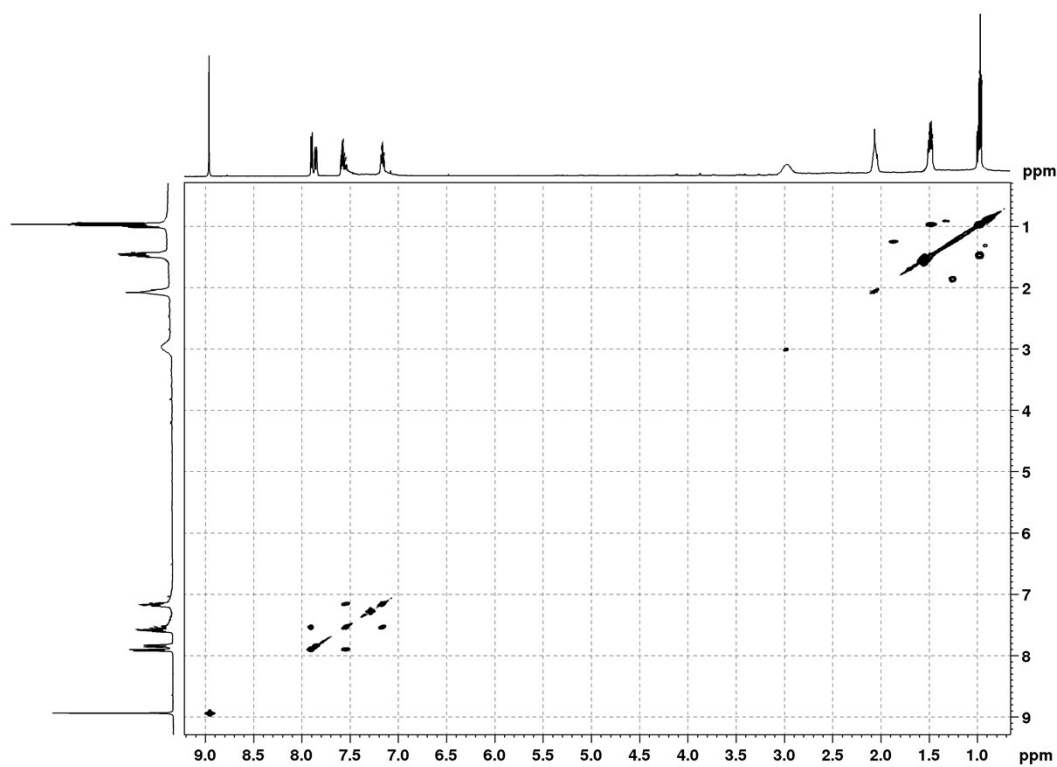

Figure S78. Copy of COSY NMR spectra of compound 14

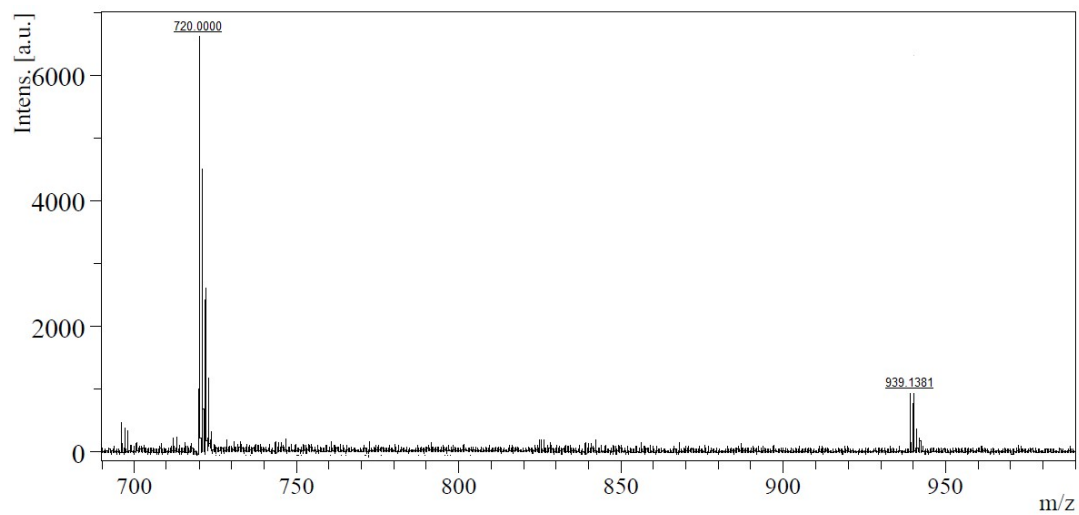

Figure S79. Copy of MALDI TOF spectra of compound 14

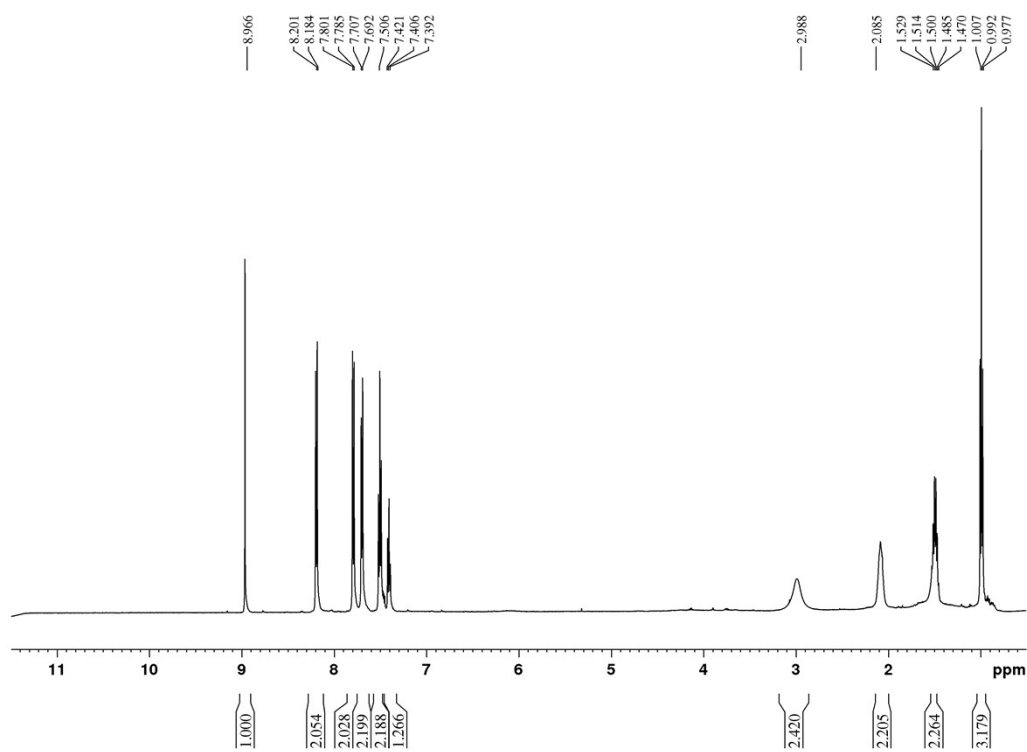

Figure S80. Copy of <sup>1</sup>H NMR spectra of compound 15

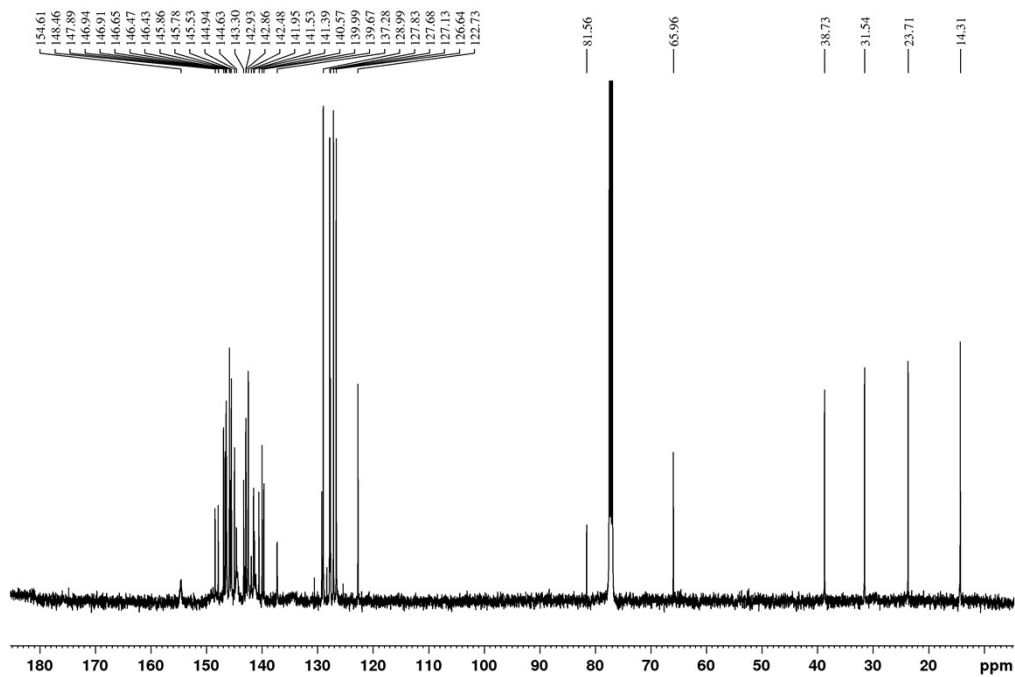

Figure S81. Copy of  $^{13}\text{C}$  NMR spectra of compound **15**

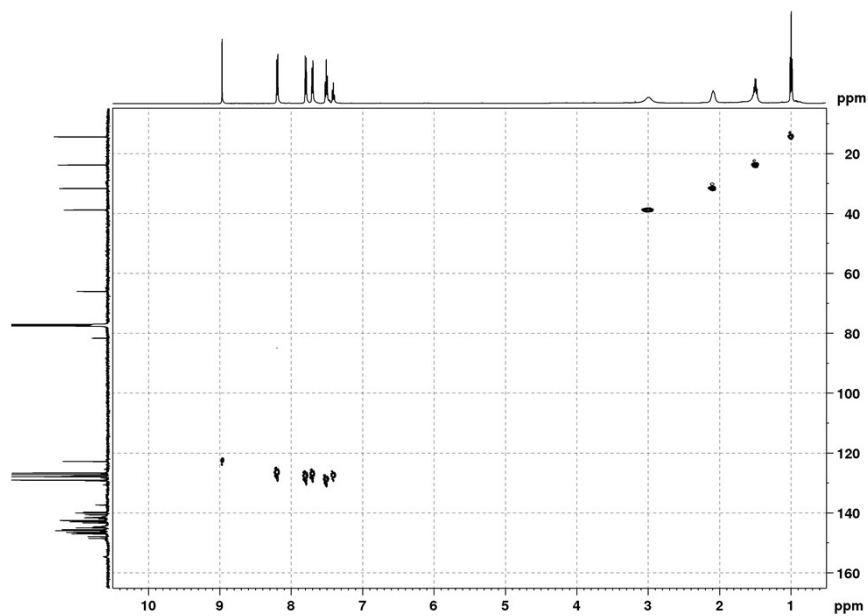

Figure S82. Copy of HSQC NMR spectra of compound **15**

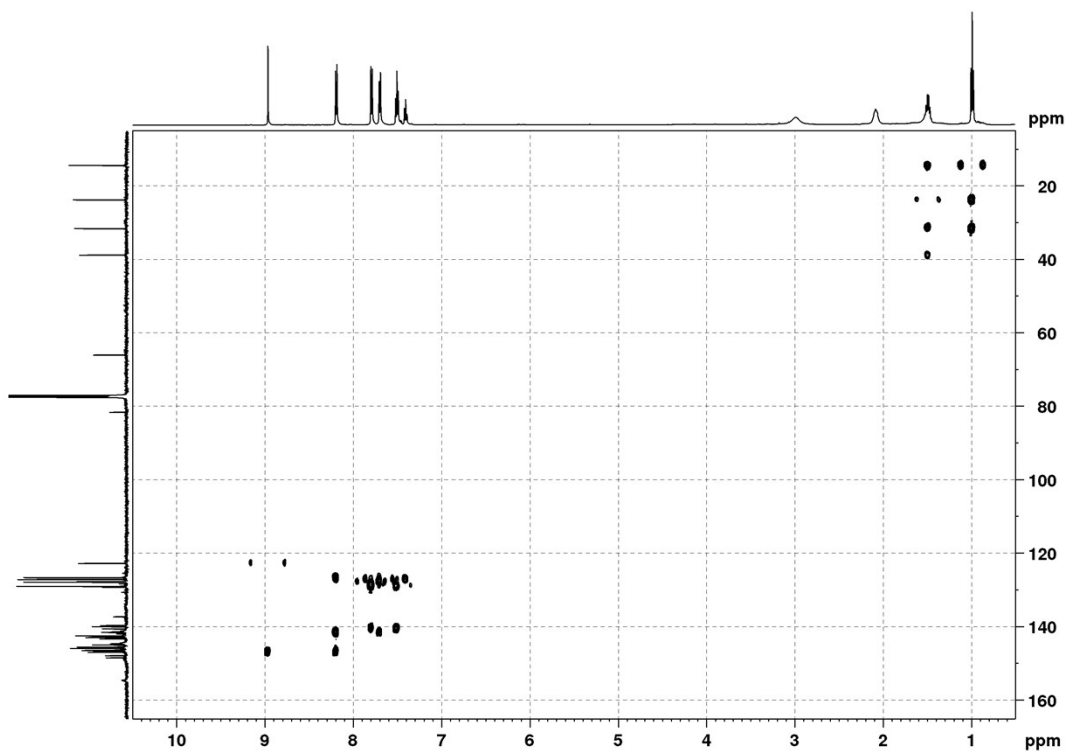

Figure S83. Copy of HMBC NMR spectra of compound 15

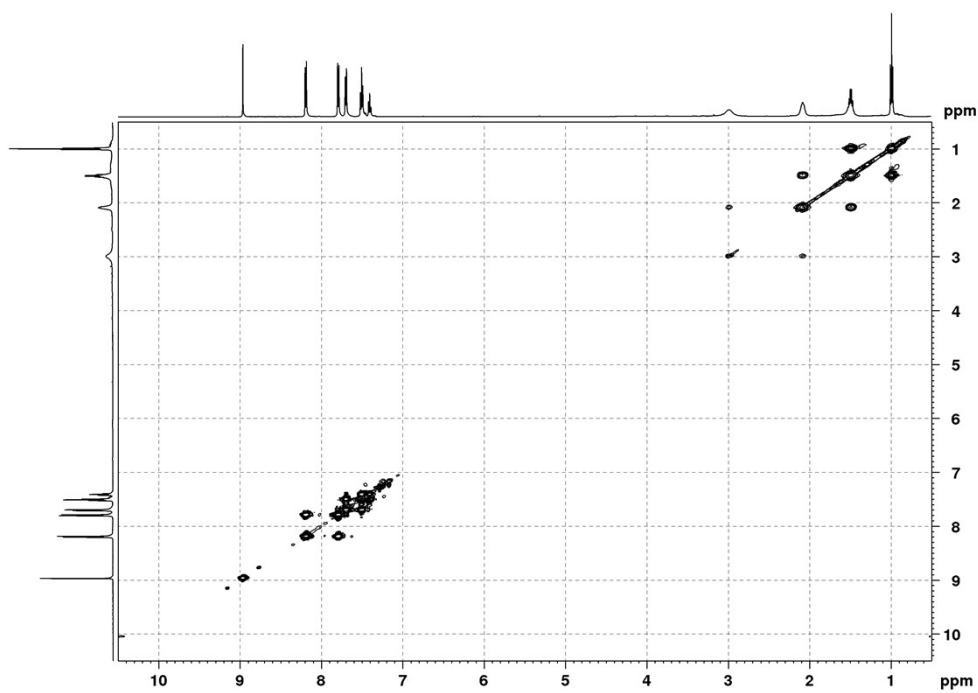

Figure S84. Copy of COSY NMR spectra of compound 15

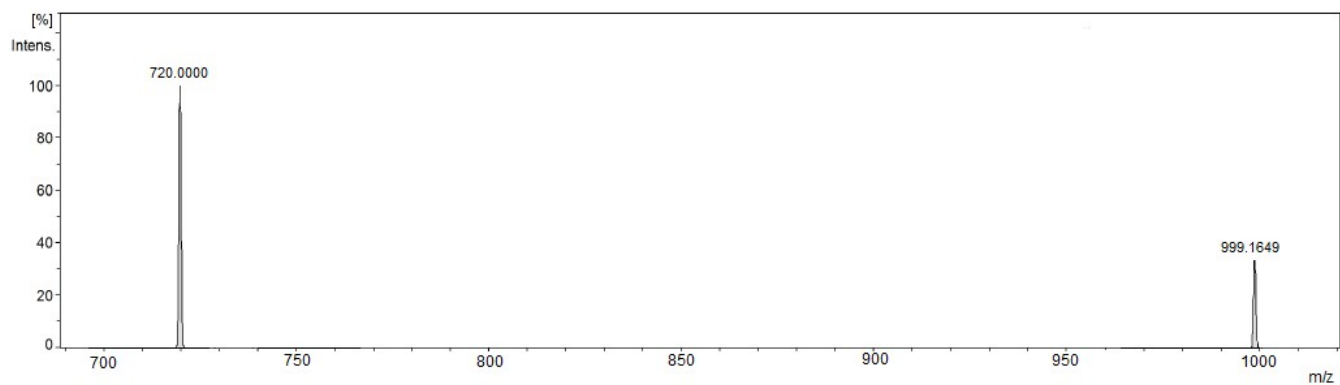

**Figure S85.** Copy of MALDI TOF spectra of compound **15**

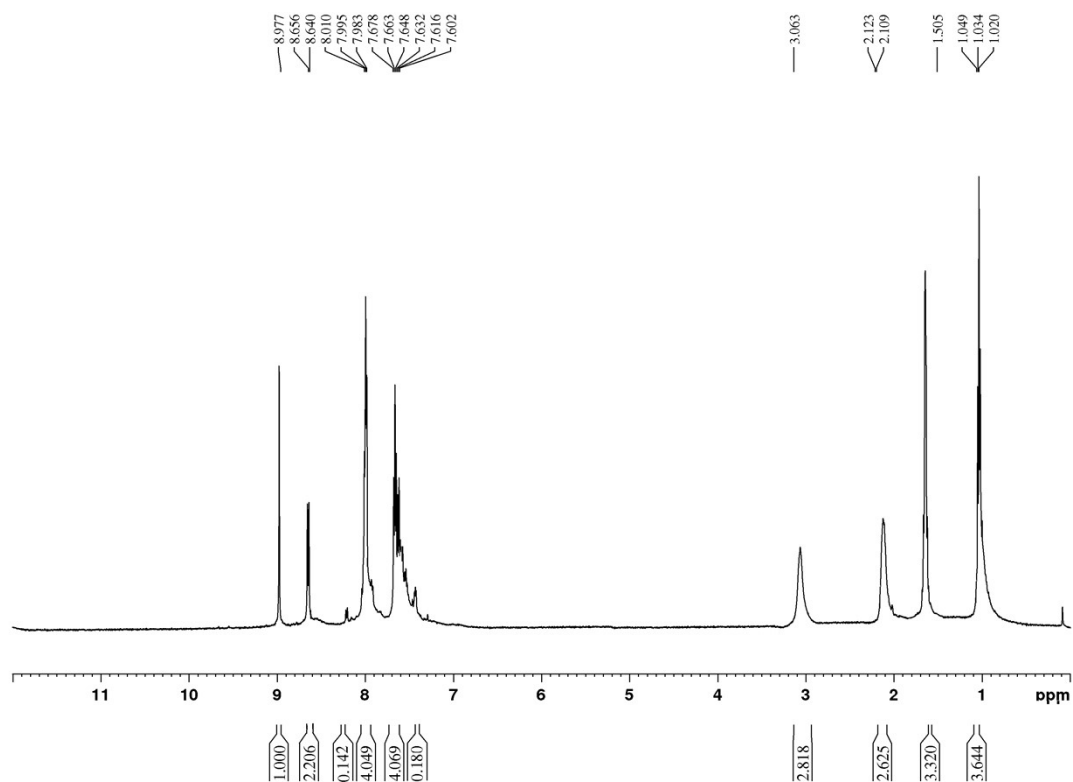

**Figure S86.** Copy of <sup>1</sup>H NMR spectra of compound **16**

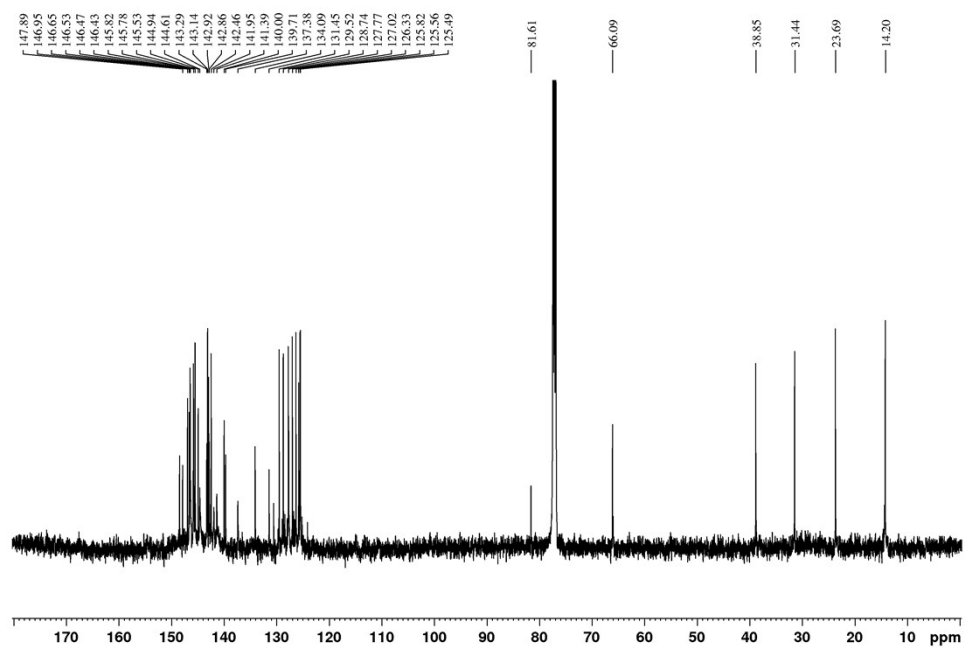

Figure S87. Copy of  $^{13}\text{C}$  NMR spectra of compound 16

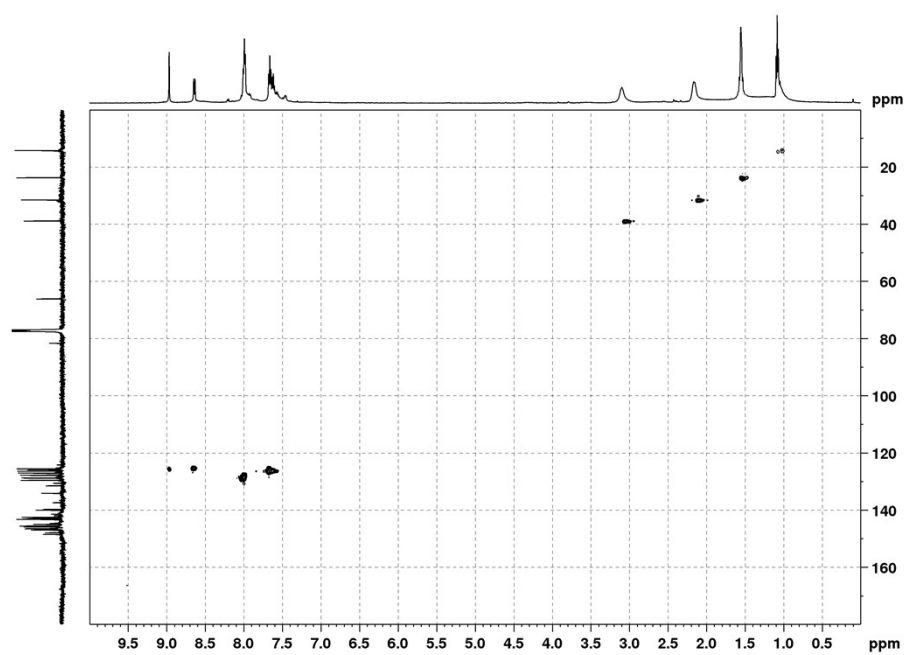

Figure S88. Copy of HSQC NMR spectra of compound 16

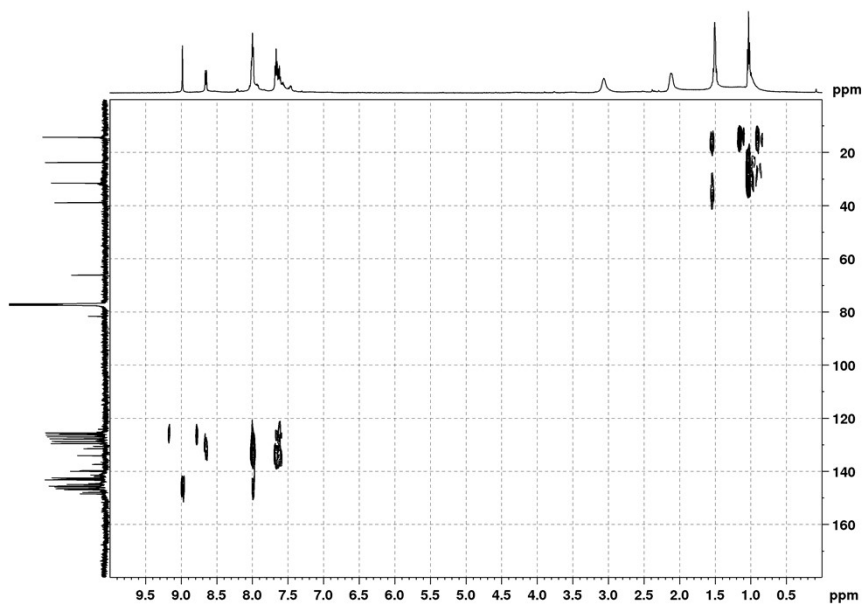

**Figure S89.** Copy of HMBC NMR spectra of compound **16**

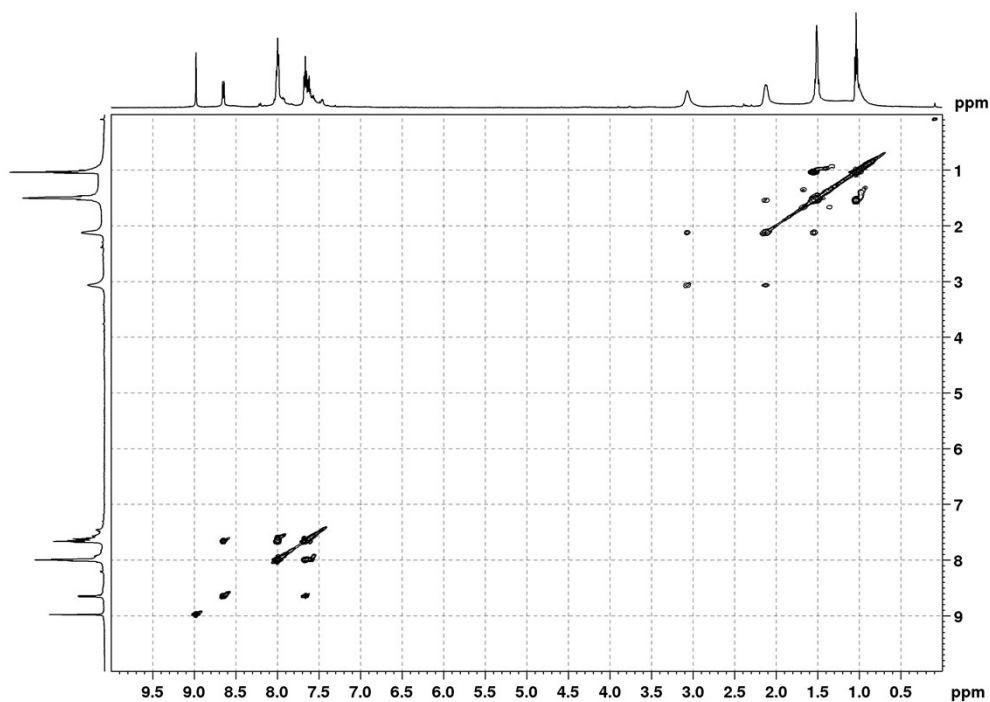

**Figure S90.** Copy of COSY NMR spectra of compound **16**



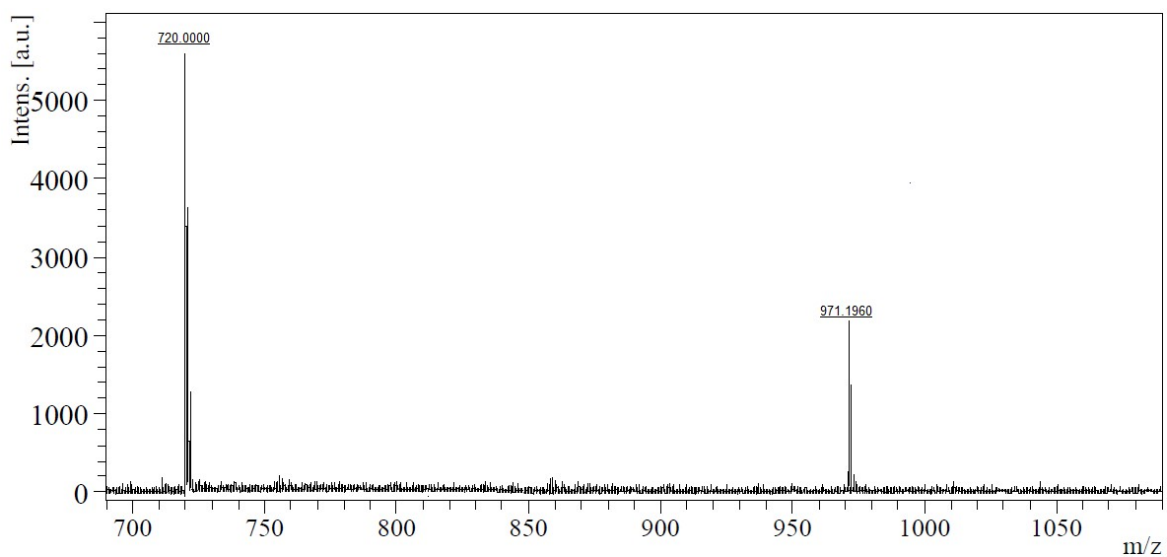

**Figure S91.** Copy of MALDI TOF spectra of compound **16**

## Cartesian coordinates

### Compound 5

|   |              |              |              |
|---|--------------|--------------|--------------|
| 6 | 1.821167000  | 1.449243000  | -0.105222000 |
| 6 | 2.117621000  | -0.124847000 | -0.392510000 |
| 6 | 1.621314000  | -1.083303000 | 0.706617000  |
| 6 | 1.175742000  | -0.674913000 | 1.948758000  |
| 6 | 0.891425000  | 0.750575000  | 2.215397000  |
| 6 | 1.057727000  | 1.685935000  | 1.210501000  |
| 6 | 0.052650000  | 2.698987000  | 1.027611000  |
| 6 | -0.101126000 | 2.929744000  | -0.396923000 |
| 6 | 0.809609000  | 2.059509000  | -1.093314000 |
| 6 | 0.403122000  | 1.475890000  | -2.278949000 |
| 6 | 0.689743000  | 0.051262000  | -2.540112000 |
| 6 | 1.373706000  | -0.707946000 | -1.613273000 |
| 6 | 0.919674000  | -2.039474000 | -1.315492000 |
| 6 | 1.072709000  | -2.271595000 | 0.109530000  |
| 6 | 0.140270000  | -3.064184000 | 0.798728000  |
| 6 | -0.310336000 | -2.648872000 | 2.107575000  |
| 6 | 0.196895000  | -1.464879000 | 2.667131000  |
| 6 | -0.693129000 | -0.554774000 | 3.365896000  |
| 6 | -0.265092000 | 0.805486000  | 3.085963000  |
| 6 | -1.224428000 | 1.820590000  | 2.936450000  |
| 6 | -1.059482000 | 2.792859000  | 1.881195000  |
| 6 | -2.370856000 | 3.098798000  | 1.331129000  |
| 6 | -2.519671000 | 3.320212000  | -0.043433000 |
| 6 | -1.364268000 | 3.247041000  | -0.923684000 |
| 6 | -1.779609000 | 2.647808000  | -2.169740000 |
| 6 | -0.908258000 | 1.761990000  | -2.824083000 |
| 6 | -1.431391000 | 0.544818000  | -3.420362000 |
| 6 | -0.445479000 | -0.506641000 | -3.243787000 |
| 6 | -0.864221000 | -1.823685000 | -2.993357000 |
| 6 | -0.163951000 | -2.609232000 | -2.004008000 |
| 6 | -1.140863000 | -3.413685000 | -1.286102000 |
| 6 | -0.991892000 | -3.637512000 | 0.087635000  |
| 6 | -2.147307000 | -3.569780000 | 0.966381000  |
| 6 | -1.723883000 | -2.958442000 | 2.217453000  |
| 6 | -2.581896000 | -2.076417000 | 2.890426000  |
| 6 | -2.055845000 | -0.856153000 | 3.484518000  |
| 6 | -3.048152000 | 0.194180000  | 3.312413000  |
| 6 | -2.638152000 | 1.508283000  | 3.042935000  |
| 6 | -3.349552000 | 2.300514000  | 2.050142000  |
| 6 | -4.441984000 | 1.750166000  | 1.365717000  |
| 6 | -4.597875000 | 1.982254000  | -0.062720000 |
| 6 | -3.654743000 | 2.755474000  | -0.754307000 |
| 6 | -3.194032000 | 2.336910000  | -2.070426000 |
| 6 | -3.696002000 | 1.159741000  | -2.644230000 |
| 6 | -2.798283000 | 0.250048000  | -3.340039000 |
| 6 | -3.230184000 | -1.111825000 | -3.062708000 |
| 6 | -2.279534000 | -2.129839000 | -2.894705000 |

|   |              |              |              |
|---|--------------|--------------|--------------|
| 6 | -2.452336000 | -3.115440000 | -1.837486000 |
| 6 | -3.567557000 | -3.047256000 | -0.990666000 |
| 6 | -3.412531000 | -3.279192000 | 0.437660000  |
| 6 | -4.300575000 | -2.367141000 | 1.139192000  |
| 6 | -3.891671000 | -1.778535000 | 2.344899000  |
| 6 | -4.179235000 | -0.373919000 | 2.604658000  |
| 6 | -4.864492000 | 0.388685000  | 1.647836000  |
| 6 | -5.281248000 | -0.221275000 | 0.395926000  |
| 6 | -5.116030000 | 0.763460000  | -0.660492000 |
| 6 | -4.672920000 | 0.361323000  | -1.928911000 |
| 6 | -4.384513000 | -1.043728000 | -2.187761000 |
| 6 | -4.551744000 | -1.993057000 | -1.169227000 |
| 6 | -5.005552000 | -1.573192000 | 0.146349000  |
| 6 | 3.158464000  | 2.269859000  | -0.117096000 |
| 1 | 3.635751000  | 2.110493000  | -1.096699000 |
| 1 | 3.828921000  | 1.832722000  | 0.641632000  |
| 6 | 3.031896000  | 3.774296000  | 0.144381000  |
| 1 | 2.381144000  | 4.240781000  | -0.615707000 |
| 1 | 2.546976000  | 3.957254000  | 1.119466000  |
| 6 | 4.400781000  | 4.469214000  | 0.126497000  |
| 1 | 5.055057000  | 4.004219000  | 0.885534000  |
| 1 | 4.889062000  | 4.286963000  | -0.847251000 |
| 6 | 4.307500000  | 5.976513000  | 0.381608000  |
| 1 | 3.857670000  | 6.189047000  | 1.364999000  |
| 1 | 3.686271000  | 6.472549000  | -0.381522000 |
| 1 | 5.301190000  | 6.449075000  | 0.360685000  |
| 6 | 4.498734000  | -0.804106000 | 0.302663000  |
| 6 | 5.686247000  | -0.837921000 | -0.420112000 |
| 1 | 4.245552000  | -1.050436000 | 1.327536000  |
| 7 | 3.563701000  | -0.381480000 | -0.594302000 |
| 7 | 4.131364000  | -0.159549000 | -1.814733000 |
| 7 | 5.402024000  | -0.434018000 | -1.705794000 |
| 6 | 7.041241000  | -1.217430000 | -0.007019000 |
| 6 | 7.327588000  | -1.601292000 | 1.317353000  |
| 6 | 8.088415000  | -1.199659000 | -0.949186000 |
| 6 | 8.625234000  | -1.959123000 | 1.688832000  |
| 6 | 9.384198000  | -1.557627000 | -0.573377000 |
| 6 | 9.659520000  | -1.938960000 | 0.745439000  |
| 1 | 6.531641000  | -1.621001000 | 2.066358000  |
| 1 | 7.862997000  | -0.901334000 | -1.974496000 |
| 1 | 8.830538000  | -2.255135000 | 2.720255000  |
| 1 | 10.185597000 | -1.539575000 | -1.315775000 |
| 1 | 10.674131000 | -2.219198000 | 1.037360000  |

Compound 6

|   |             |              |              |
|---|-------------|--------------|--------------|
| 6 | 1.491215000 | 1.548221000  | -0.060078000 |
| 6 | 1.855400000 | -0.023683000 | -0.274063000 |

|   |              |              |              |
|---|--------------|--------------|--------------|
| 6 | 1.350920000  | -0.957630000 | 0.841942000  |
| 6 | 0.8444464000 | -0.519864000 | 2.050047000  |
| 6 | 0.498979000  | 0.902836000  | 2.250459000  |
| 6 | 0.669410000  | 1.805314000  | 1.216551000  |
| 6 | -0.364764000 | 2.771368000  | 0.957192000  |
| 6 | -0.472262000 | 2.941907000  | -0.480062000 |
| 6 | 0.495964000  | 2.081267000  | -1.107497000 |
| 6 | 0.157428000  | 1.438026000  | -2.283638000 |
| 6 | 0.506631000  | 0.016577000  | -2.478406000 |
| 6 | 1.183452000  | -0.680914000 | -1.499025000 |
| 6 | 0.766020000  | -2.016210000 | -1.165340000 |
| 6 | 0.871279000  | -2.187796000 | 0.272166000  |
| 6 | -0.056419000 | -2.989015000 | 0.957239000  |
| 6 | -0.571343000 | -2.542684000 | 2.231928000  |
| 6 | -0.130831000 | -1.319269000 | 2.762451000  |
| 6 | -1.079509000 | -0.418282000 | 3.391984000  |
| 6 | -0.691674000 | 0.945839000  | 3.074518000  |
| 6 | -1.681390000 | 1.916946000  | 2.850650000  |
| 6 | -1.512005000 | 2.853828000  | 1.764556000  |
| 6 | -2.811415000 | 3.088552000  | 1.154922000  |
| 6 | -2.915340000 | 3.251723000  | -0.231988000 |
| 6 | -1.725257000 | 3.189964000  | -1.065431000 |
| 6 | -2.069742000 | 2.528574000  | -2.301659000 |
| 6 | -1.141882000 | 1.652235000  | -2.887251000 |
| 6 | -1.596124000 | 0.394317000  | -3.454471000 |
| 6 | -0.579481000 | -0.610970000 | -3.200868000 |
| 6 | -0.958494000 | -1.932677000 | -2.914891000 |
| 6 | -0.268332000 | -2.653128000 | -1.870359000 |
| 6 | -1.241838000 | -3.467084000 | -1.158211000 |
| 6 | -1.137765000 | -3.632821000 | 0.228043000  |
| 6 | -2.327533000 | -3.576412000 | 1.060436000  |
| 6 | -1.975679000 | -2.902332000 | 2.301483000  |
| 6 | -2.890797000 | -2.028468000 | 2.906437000  |
| 6 | -2.433663000 | -0.767332000 | 3.471373000  |
| 6 | -3.456848000 | 0.236708000  | 3.221883000  |
| 6 | -3.085755000 | 1.554494000  | 2.916737000  |
| 6 | -3.786932000 | 2.280747000  | 1.867742000  |
| 6 | -4.830468000 | 1.662692000  | 1.165309000  |
| 6 | -4.939663000 | 1.834578000  | -0.275507000 |
| 6 | -4.000178000 | 2.616871000  | -0.961493000 |
| 6 | -3.474730000 | 2.167548000  | -2.242942000 |
| 6 | -3.909768000 | 0.950518000  | -2.787561000 |
| 6 | -2.953211000 | 0.050414000  | -3.413591000 |
| 6 | -3.344852000 | -1.315589000 | -3.099143000 |
| 6 | -2.364405000 | -2.289283000 | -2.856853000 |
| 6 | -2.541109000 | -3.240059000 | -1.768839000 |
| 6 | -3.689954000 | -3.183172000 | -0.967056000 |
| 6 | -3.581378000 | -3.354714000 | 0.474171000  |
| 6 | -4.528887000 | -2.451322000 | 1.106016000  |
| 6 | -4.189051000 | -1.802406000 | 2.302133000  |

|   |              |              |              |
|---|--------------|--------------|--------------|
| 6 | -4.538169000 | -0.401110000 | 2.495907000  |
| 6 | -5.213601000 | 0.297946000  | 1.485066000  |
| 6 | -5.558755000 | -0.374421000 | 0.243336000  |
| 6 | -5.389449000 | 0.575403000  | -0.843878000 |
| 6 | -4.883201000 | 0.142801000  | -2.078097000 |
| 6 | -4.534134000 | -1.259061000 | -2.271344000 |
| 6 | -4.704896000 | -2.175015000 | -1.223159000 |
| 6 | -5.223561000 | -1.723005000 | 0.057340000  |
| 6 | 2.797439000  | 2.416454000  | -0.056133000 |
| 1 | 3.315406000  | 2.240029000  | -1.011828000 |
| 1 | 3.455523000  | 2.032239000  | 0.741060000  |
| 6 | 2.607894000  | 3.923607000  | 0.145166000  |
| 1 | 1.964822000  | 4.337568000  | -0.651038000 |
| 1 | 2.086084000  | 4.122891000  | 1.097778000  |
| 6 | 3.949816000  | 4.669897000  | 0.142174000  |
| 1 | 4.596881000  | 4.259880000  | 0.938218000  |
| 1 | 4.475283000  | 4.470424000  | -0.808538000 |
| 6 | 3.791239000  | 6.180870000  | 0.335471000  |
| 1 | 3.303408000  | 6.412776000  | 1.296046000  |
| 1 | 3.175697000  | 6.622849000  | -0.464594000 |
| 1 | 4.766541000  | 6.690569000  | 0.325381000  |
| 6 | 4.223422000  | -0.591542000 | 0.548646000  |
| 6 | 5.442483000  | -0.612649000 | -0.119136000 |
| 1 | 3.931218000  | -0.808031000 | 1.569824000  |
| 7 | 3.317760000  | -0.234235000 | -0.404557000 |
| 7 | 3.933463000  | -0.039625000 | -1.606476000 |
| 7 | 5.205651000  | -0.267373000 | -1.430636000 |
| 6 | 6.787527000  | -0.934246000 | 0.369998000  |
| 6 | 7.022407000  | -1.255319000 | 1.721293000  |
| 6 | 7.869565000  | -0.922929000 | -0.525606000 |
| 6 | 8.312527000  | -1.559752000 | 2.161853000  |
| 6 | 9.172603000  | -1.228141000 | -0.086892000 |
| 6 | 9.387484000  | -1.549120000 | 1.272029000  |
| 1 | 6.195069000  | -1.267384000 | 2.434938000  |
| 1 | 7.689510000  | -0.674397000 | -1.572151000 |
| 1 | 8.481992000  | -1.807984000 | 3.211985000  |
| 1 | 10.396714000 | -1.786511000 | 1.612364000  |
| 6 | 10.263548000 | -1.213883000 | -1.005887000 |
| 6 | 11.196277000 | -1.202975000 | -1.785653000 |
| 1 | 12.014351000 | -1.192825000 | -2.475602000 |

Compound 15

|   |              |              |              |
|---|--------------|--------------|--------------|
| 6 | 0.554711000  | 1.857709000  | -0.118583000 |
| 6 | 1.077611000  | 0.374037000  | -0.531227000 |
| 6 | 0.801636000  | -0.718713000 | 0.518573000  |
| 6 | 0.368720000  | -0.467424000 | 1.805762000  |
| 6 | -0.120113000 | 0.873820000  | 2.187318000  |

|   |              |              |              |
|---|--------------|--------------|--------------|
| 6 | -0.160494000 | 1.885400000  | 1.244808000  |
| 6 | -1.323385000 | 2.730368000  | 1.179902000  |
| 6 | -1.591311000 | 3.023593000  | -0.215850000 |
| 6 | -0.595718000 | 2.356886000  | -1.012818000 |
| 6 | -0.970293000 | 1.793078000  | -2.218215000 |
| 6 | -0.476848000 | 0.452862000  | -2.594141000 |
| 6 | 0.367898000  | -0.243164000 | -1.754892000 |
| 6 | 0.148690000  | -1.646583000 | -1.532912000 |
| 6 | 0.415403000  | -1.939463000 | -0.136467000 |
| 6 | -0.337537000 | -2.915144000 | 0.535837000  |
| 6 | -0.773006000 | -2.662695000 | 1.890304000  |
| 6 | -0.429396000 | -1.449797000 | 2.510148000  |
| 6 | -1.411682000 | -0.741410000 | 3.311484000  |
| 6 | -1.221074000 | 0.685161000  | 3.110089000  |
| 6 | -2.336158000 | 1.538495000  | 3.077405000  |
| 6 | -2.386619000 | 2.589180000  | 2.087480000  |
| 6 | -3.758200000 | 2.712305000  | 1.619721000  |
| 6 | -4.017481000 | 2.994608000  | 0.273038000  |
| 6 | -2.916589000 | 3.166078000  | -0.661991000 |
| 6 | -3.301210000 | 2.587029000  | -1.927334000 |
| 6 | -2.338731000 | 1.897283000  | -2.682561000 |
| 6 | -2.694910000 | 0.651265000  | -3.339821000 |
| 6 | -1.546601000 | -0.235841000 | -3.284249000 |
| 6 | -1.736366000 | -1.617065000 | -3.110409000 |
| 6 | -0.866667000 | -2.340163000 | -2.211526000 |
| 6 | -1.661896000 | -3.334628000 | -1.508136000 |
| 6 | -1.401999000 | -3.619099000 | -0.162368000 |
| 6 | -2.501997000 | -3.795961000 | 0.770938000  |
| 6 | -2.111358000 | -3.203459000 | 2.041711000  |
| 6 | -3.059249000 | -2.516243000 | 2.814211000  |
| 6 | -2.700916000 | -1.266640000 | 3.469022000  |
| 6 | -3.855368000 | -0.382319000 | 3.418293000  |
| 6 | -3.674540000 | 0.995678000  | 3.225950000  |
| 6 | -4.556361000 | 1.723500000  | 2.324476000  |
| 6 | -5.583429000 | 1.047428000  | 1.651898000  |
| 6 | -5.852884000 | 1.340054000  | 0.252304000  |
| 6 | -5.086332000 | 2.298634000  | -0.424100000 |
| 6 | -4.640974000 | 2.045533000  | -1.786561000 |
| 6 | -4.981078000 | 0.840918000  | -2.420028000 |
| 6 | -3.991297000 | 0.134013000  | -3.218954000 |
| 6 | -4.185345000 | -1.294504000 | -3.020052000 |
| 6 | -3.077581000 | -2.153514000 | -2.968694000 |
| 6 | -3.032460000 | -3.219004000 | -1.977686000 |
| 6 | -4.094619000 | -3.385316000 | -1.078170000 |
| 6 | -3.825024000 | -3.679920000 | 0.321136000  |
| 6 | -4.804687000 | -2.968823000 | 1.125311000  |
| 6 | -4.428254000 | -2.400588000 | 2.350764000  |
| 6 | -4.920232000 | -1.080125000 | 2.723604000  |
| 6 | -5.769533000 | -0.379114000 | 1.855644000  |
| 6 | -6.154076000 | -0.968329000 | 0.583316000  |

|   |              |              |              |
|---|--------------|--------------|--------------|
| 6 | -6.205005000 | 0.094489000  | -0.406973000 |
| 6 | -5.776274000 | -0.149152000 | -1.719522000 |
| 6 | -5.285826000 | -1.470009000 | -2.091945000 |
| 6 | -5.242682000 | -2.496210000 | -1.136654000 |
| 6 | -5.681619000 | -2.238647000 | 0.225171000  |
| 6 | 1.745971000  | 2.877299000  | -0.136964000 |
| 1 | 2.178745000  | 2.860995000  | -1.149567000 |
| 1 | 2.522973000  | 2.498603000  | 0.548136000  |
| 6 | 1.412032000  | 4.323233000  | 0.244959000  |
| 1 | 0.638360000  | 4.728184000  | -0.430628000 |
| 1 | 0.987193000  | 4.367483000  | 1.263164000  |
| 6 | 2.655022000  | 5.222592000  | 0.178953000  |
| 1 | 3.431630000  | 4.820772000  | 0.854166000  |
| 1 | 3.083364000  | 5.175458000  | -0.837809000 |
| 6 | 2.358050000  | 6.679364000  | 0.546977000  |
| 1 | 1.959290000  | 6.759435000  | 1.571225000  |
| 1 | 1.612179000  | 7.119145000  | -0.134603000 |
| 1 | 3.265438000  | 7.299740000  | 0.492809000  |
| 6 | 3.568819000  | -0.016560000 | -0.021194000 |
| 6 | 4.700792000  | 0.155694000  | -0.810901000 |
| 1 | 3.415712000  | -0.378990000 | 0.988734000  |
| 7 | 2.532290000  | 0.360313000  | -0.821578000 |
| 7 | 2.986143000  | 0.749357000  | -2.048022000 |
| 7 | 4.284607000  | 0.627551000  | -2.036592000 |
| 6 | 6.112031000  | -0.103477000 | -0.517761000 |
| 6 | 6.537858000  | -0.546847000 | 0.749071000  |
| 6 | 7.083881000  | 0.081170000  | -1.520521000 |
| 6 | 7.884448000  | -0.801094000 | 1.001803000  |
| 6 | 8.428574000  | -0.175741000 | -1.263754000 |
| 6 | 8.861271000  | -0.624291000 | 0.000926000  |
| 1 | 5.809036000  | -0.706757000 | 1.548023000  |
| 1 | 6.762081000  | 0.434526000  | -2.501767000 |
| 1 | 8.184681000  | -1.172795000 | 1.984417000  |
| 1 | 9.165811000  | -0.001798000 | -2.051261000 |
| 6 | 10.291988000 | -0.904423000 | 0.268812000  |
| 6 | 10.873964000 | -0.584759000 | 1.512250000  |
| 6 | 11.108904000 | -1.500327000 | -0.713508000 |
| 6 | 12.222271000 | -0.850531000 | 1.764036000  |
| 6 | 12.456898000 | -1.766906000 | -0.461058000 |
| 6 | 13.020200000 | -1.443242000 | 0.778651000  |
| 1 | 10.266731000 | -0.095666000 | 2.277954000  |
| 1 | 10.671923000 | -1.782446000 | -1.674530000 |
| 1 | 12.654495000 | -0.584996000 | 2.731839000  |
| 1 | 13.068666000 | -2.238757000 | -1.233761000 |
| 1 | 14.074262000 | -1.651655000 | 0.975488000  |

## Compound 16

|   |              |              |              |
|---|--------------|--------------|--------------|
| 6 | 1.122096000  | 1.671634000  | -0.080077000 |
| 6 | 1.503647000  | 0.196786000  | -0.654374000 |
| 6 | 1.177916000  | -0.968355000 | 0.299475000  |
| 6 | 0.819539000  | -0.809587000 | 1.623876000  |
| 6 | 0.459583000  | 0.523298000  | 2.151362000  |
| 6 | 0.467783000  | 1.622895000  | 1.312573000  |
| 6 | -0.620228000 | 2.561840000  | 1.384429000  |
| 6 | -0.919510000 | 3.008830000  | 0.036767000  |
| 6 | -0.016949000 | 2.345533000  | -0.866463000 |
| 6 | -0.484921000 | 1.933148000  | -2.100021000 |
| 6 | -0.121590000 | 0.601012000  | -2.622573000 |
| 6 | 0.697117000  | -0.238966000 | -1.896323000 |
| 6 | 0.367766000  | -1.635322000 | -1.796859000 |
| 6 | 0.664860000  | -2.084692000 | -0.448774000 |
| 6 | -0.142602000 | -3.056429000 | 0.164504000  |
| 6 | -0.500750000 | -2.903132000 | 1.556126000  |
| 6 | -0.031572000 | -1.787879000 | 2.269488000  |
| 6 | -0.917416000 | -1.084612000 | 3.179347000  |
| 6 | -0.614111000 | 0.334670000  | 3.105244000  |
| 6 | -1.653195000 | 1.274395000  | 3.206762000  |
| 6 | -1.654346000 | 2.417720000  | 2.324575000  |
| 6 | -3.028657000 | 2.697357000  | 1.938614000  |
| 6 | -3.317287000 | 3.128693000  | 0.637939000  |
| 6 | -2.244179000 | 3.301246000  | -0.328797000 |
| 6 | -2.726596000 | 2.881815000  | -1.623464000 |
| 6 | -1.857035000 | 2.193359000  | -2.485544000 |
| 6 | -2.343420000 | 1.049713000  | -3.237821000 |
| 6 | -1.273390000 | 0.071744000  | -3.321066000 |
| 6 | -1.572275000 | -1.299492000 | -3.269271000 |
| 6 | -0.730575000 | -2.175012000 | -2.487387000 |
| 6 | -1.578721000 | -3.167322000 | -1.844256000 |
| 6 | -1.289943000 | -3.601112000 | -0.544854000 |
| 6 | -2.362816000 | -3.778512000 | 0.419722000  |
| 6 | -1.872744000 | -3.347391000 | 1.720671000  |
| 6 | -2.727301000 | -2.664472000 | 2.599179000  |
| 6 | -2.238388000 | -1.517269000 | 3.349630000  |
| 6 | -3.314393000 | -0.541776000 | 3.437713000  |
| 6 | -3.025537000 | 0.828969000  | 3.367266000  |
| 6 | -3.878861000 | 1.710589000  | 2.583824000  |
| 6 | -4.986258000 | 1.188189000  | 1.900562000  |
| 6 | -5.287014000 | 1.637806000  | 0.549616000  |
| 6 | -4.468100000 | 2.592287000  | -0.069684000 |
| 6 | -4.100361000 | 2.437978000  | -1.469705000 |
| 6 | -4.566259000 | 1.332330000  | -2.196431000 |
| 6 | -3.672608000 | 0.629748000  | -3.104207000 |
| 6 | -3.979729000 | -0.791109000 | -3.032624000 |
| 6 | -2.947353000 | -1.737634000 | -3.115317000 |
| 6 | -2.952750000 | -2.895146000 | -2.232862000 |
| 6 | -3.988202000 | -3.062891000 | -1.302908000 |



|   |              |              |              |
|---|--------------|--------------|--------------|
| 6 | -3.687856000 | -3.511956000 | 0.048291000  |
| 6 | -4.571105000 | -2.806839000 | 0.962081000  |
| 6 | -4.099111000 | -2.392848000 | 2.215739000  |
| 6 | -4.461838000 | -1.080073000 | 2.733335000  |
| 6 | -5.283285000 | -0.231895000 | 1.976869000  |
| 6 | -5.767622000 | -0.661135000 | 0.674791000  |
| 6 | -5.769727000 | 0.494720000  | -0.206909000 |
| 6 | -5.415498000 | 0.346422000  | -1.555709000 |
| 6 | -5.051881000 | -0.967148000 | -2.072502000 |
| 6 | -5.057580000 | -2.082133000 | -1.221944000 |
| 6 | -5.418066000 | -1.924096000 | 0.177290000  |
| 6 | 2.389145000  | 2.595796000  | -0.062253000 |
| 1 | 2.783728000  | 2.635390000  | -1.089780000 |
| 1 | 3.157802000  | 2.105306000  | 0.557785000  |
| 6 | 2.180345000  | 4.024676000  | 0.451572000  |
| 1 | 1.412944000  | 4.539959000  | -0.152069000 |
| 1 | 1.800522000  | 4.011498000  | 1.488364000  |
| 6 | 3.481763000  | 4.838728000  | 0.405263000  |
| 1 | 4.254242000  | 4.326362000  | 1.006162000  |
| 1 | 3.864080000  | 4.854449000  | -0.630658000 |
| 6 | 3.303539000  | 6.273298000  | 0.911302000  |
| 1 | 2.953564000  | 6.287853000  | 1.956185000  |
| 1 | 2.563053000  | 6.820557000  | 0.305921000  |
| 1 | 4.249383000  | 6.834155000  | 0.868278000  |
| 6 | 3.981170000  | -0.339136000 | -0.239768000 |
| 6 | 5.104823000  | -0.147736000 | -1.036805000 |
| 1 | 3.835583000  | -0.751106000 | 0.752278000  |
| 7 | 2.941905000  | 0.103386000  | -1.001088000 |
| 7 | 3.384924000  | 0.550082000  | -2.211649000 |
| 7 | 4.680585000  | 0.395476000  | -2.229428000 |
| 1 | 6.241638000  | -1.077957000 | 1.270383000  |
| 6 | 6.955712000  | -0.896783000 | 0.461358000  |
| 6 | 6.519397000  | -0.424050000 | -0.771123000 |
| 6 | 7.477992000  | -0.191077000 | -1.802873000 |
| 6 | 8.817323000  | -0.429469000 | -1.584756000 |
| 6 | 9.287602000  | -0.912045000 | -0.331019000 |
| 6 | 8.328302000  | -1.150951000 | 0.715051000  |
| 6 | 8.790832000  | -1.630734000 | 1.973120000  |
| 6 | 10.135184000 | -1.864122000 | 2.190954000  |
| 6 | 11.079421000 | -1.628636000 | 1.159478000  |
| 6 | 10.662537000 | -1.163145000 | -0.073882000 |
| 1 | 7.120481000  | 0.181001000  | -2.764289000 |
| 1 | 9.542237000  | -0.247316000 | -2.383065000 |
| 1 | 11.388140000 | -0.980291000 | -0.871350000 |
| 1 | 12.139523000 | -1.816951000 | 1.344198000  |
| 1 | 10.476158000 | -2.231941000 | 3.161524000  |
| 1 | 8.061738000  | -1.812205000 | 2.767967000  |
